# Supplementary material for: Using of n-grams from morphological tags for fake news classification
Source: PeerJ Comput Sci. 2021 Jul 19;7:e624. doi: 10.7717/peerj-cs.624 (PMC8323729; doi:10.7717/peerj-cs.624)
Supplement: Supplemental Information 1 — We evaluated using evaluation measures (prec, rec, f1-sc, prec_fake, rec_fake, prec_real, rec_real), as well as from time effectivity point of view (time). [file peerj-cs-07-624-s001.xlsx]

## Sheet: spolu
Column1	TfIdf(1,1)_deep	TfIdf(1,1)_prec	TfIdf(1,1)_prec_fake	TfIdf(1,1)_prec_real	TfIdf(1,1)_rec	TfIdf(1,1)_rec_fake	TfIdf(1,1)_rec_real	TfIdf(1,1)_f1-sc	TfIdf(1,1)_time	TfIdf(2,2)_deep	TfIdf(2,2)_prec	TfIdf(2,2)_prec_fake	TfIdf(2,2)_prec_real	TfIdf(2,2)_rec	TfIdf(2,2)_rec_fake	TfIdf(2,2)_rec_real	TfIdf(2,2)_f1-sc	TfIdf(2,2)_time	TfIdf(3,3)_deep	TfIdf(3,3)_prec	TfIdf(3,3)_prec_fake	TfIdf(3,3)_prec_real	TfIdf(3,3)_rec	TfIdf(3,3)_rec_fake	TfIdf(3,3)_rec_real	TfIdf(3,3)_f1-sc	TfIdf(3,3)_time	TfIdf(1,3)_deep	TfIdf(1,3)_prec	TfIdf(1,3)_prec_fake	TfIdf(1,3)_prec_real	TfIdf(1,3)_rec	TfIdf(1,3)_rec_fake	TfIdf(1,3)_rec_real	TfIdf(1,3)_f1-sc	TfIdf(1,3)_time	TfIdf(1,4)_deep	TfIdf(1,4)_prec	TfIdf(1,4)_prec_fake	TfIdf(1,4)_prec_real	TfIdf(1,4)_rec	TfIdf(1,4)_rec_fake	TfIdf(1,4)_rec_real	TfIdf(1,4)_f1-sc	TfIdf(1,4)_time	PosfIdf(1,1)_deep	PosfIdf(1,1)_prec	PosfIdf(1,1)_prec_fake	PosfIdf(1,1)_prec_real
0	1.0	0.75	0.7272727272727273	0.7704918032786885	0.7494026284348865	0.7407407407407407	0.7580645161290323	0.7490862982024316	1.7062087059020996	1.0	0.7758620689655172	0.7413793103448276	0.8103448275862069	0.7771804062126643	0.7962962962962963	0.7580645161290323	0.7755952380952381	6.7376508712768555	1.0	0.75	0.6811594202898551	0.851063829787234	0.7577658303464755	0.8703703703703703	0.6451612903225806	0.7490862982024316	10.81450605392456	1.0	0.8017241379310345	0.803921568627451	0.8	0.798984468339307	0.7592592592592593	0.8387096774193549	0.7999250093738284	12.911688327789307	1.0	0.5258620689655172	0.49122807017543857	0.559322033898305	0.5253882915173238	0.5185185185185185	0.532258064516129	0.524979524979525	11.631218433380127	1.0	0.6551724137931034	0.6060606060606061	0.72
1	1.0	0.7913043478260869	0.75	0.8305084745762712	0.7927350427350428	0.8076923076923077	0.7777777777777778	0.790528233151184	1.6509976387023926	1.0	0.7913043478260869	0.7258064516129032	0.8679245283018868	0.7977716727716728	0.8653846153846154	0.7301587301587301	0.7912885662431942	7.091504812240601	1.0	0.7478260869565218	0.6666666666666666	0.8695652173913043	0.7597680097680097	0.8846153846153846	0.6349206349206349	0.7471377663204185	10.410762786865234	1.0	0.7565217391304347	0.7	0.8181818181818182	0.760989010989011	0.8076923076923077	0.7142857142857143	0.7563559322033899	11.926637887954712	1.0	0.5739130434782609	0.6153846153846154	0.5686274509803921	0.5372405372405372	0.15384615384615385	0.9206349206349206	0.4745920745920746	12.103972434997559	1.0	0.6782608695652174	0.6153846153846154	0.76
2	1.0	0.782608695652174	0.74	0.8153846153846154	0.7790661719233147	0.7551020408163265	0.803030303030303	0.7783175264091294	1.647287368774414	1.0	0.8	0.7407407407407407	0.8524590163934426	0.8021026592455164	0.8163265306122449	0.7878787878787878	0.7977983334607447	6.528692722320557	1.0	0.8173913043478261	0.7258064516129032	0.9245283018867925	0.830395794681509	0.9183673469387755	0.7424242424242424	0.8171701112877584	10.441477060317993	1.0	0.7913043478260869	0.8048780487804879	0.7837837837837838	0.7761286332714904	0.673469387755102	0.8787878787878788	0.780952380952381	12.981924533843994	1.0	0.5217391304347826	0.47	0.8666666666666667	0.5780766852195424	0.9591836734693877	0.19696969696969696	0.47593006877123206	12.03148889541626	1.0	0.6608695652173913	0.5833333333333334	0.7454545454545455
3	1.0	0.7652173913043478	0.8148148148148148	0.7213114754098361	0.7680631451123254	0.7213114754098361	0.8148148148148148	0.7652173913043478	1.4818329811096191	1.0	0.7913043478260869	0.8245614035087719	0.7586206896551724	0.7926533090467516	0.7704918032786885	0.8148148148148148	0.7911622276029056	6.412454843521118	1.0	0.7565217391304347	0.7538461538461538	0.76	0.7534911961141469	0.8032786885245902	0.7037037037037037	0.7542735042735043	9.751432418823242	1.0	0.7391304347826086	0.7818181818181819	0.7	0.7413479052823315	0.7049180327868853	0.7777777777777778	0.7391107078039927	11.880446434020996	1.0	0.6347826086956522	0.6792452830188679	0.5967741935483871	0.6376745598057074	0.5901639344262295	0.6851851851851852	0.6347549909255898	11.643215894699097	1.0	0.7391304347826086	0.7313432835820896	0.75
4	1.0	0.7913043478260869	0.84	0.7538461538461538	0.7918935269207501	0.7241379310344828	0.8596491228070176	0.7905282331511839	1.5853545665740967	1.0	0.782608695652174	0.8367346938775511	0.7424242424242424	0.7832728372655777	0.7068965517241379	0.8596491228070176	0.7815515538332953	6.274419069290161	1.0	0.6956521739130435	0.7017543859649122	0.6896551724137931	0.6957047791893527	0.6896551724137931	0.7017543859649122	0.6956521739130435	10.352376461029053	1.0	0.7478260869565218	0.8372093023255814	0.6944444444444444	0.7489413188142771	0.6206896551724138	0.8771929824561403	0.7440325427891626	11.885573863983154	1.0	0.5652173913043478	0.5416666666666666	0.6842105263157895	0.5623109497882638	0.896551724137931	0.22807017543859648	0.5087149692412851	11.569018602371216	1.0	0.7652173913043478	0.7540983606557377	0.7777777777777778
5	1.0	0.7565217391304347	0.7704918032786885	0.7407407407407407	0.7556162720097146	0.7704918032786885	0.7407407407407407	0.7556162720097146	1.5166690349578857	1.0	0.7739130434782608	0.7777777777777778	0.7692307692307693	0.7720097146326654	0.8032786885245902	0.7407407407407407	0.7725197808886184	6.114867210388184	1.0	0.7304347826086957	0.7205882352941176	0.7446808510638298	0.7257134183363692	0.8032786885245902	0.6481481481481481	0.7263796147056567	10.60249924659729	1.0	0.7739130434782608	0.7966101694915254	0.75	0.7741347905282332	0.7704918032786885	0.7777777777777778	0.7734848484848486	11.572039127349854	1.0	0.5304347826086957	0.6521739130434783	0.5	0.5488767455980571	0.2459016393442623	0.8518518518518519	0.49363992172211346	11.956332921981812	1.0	0.6434782608695652	0.6666666666666666	0.6181818181818182
6	1.0	0.7478260869565218	0.7424242424242424	0.7551020408163265	0.7442319368548878	0.8032786885245902	0.6851851851851852	0.7450500726244171	1.898134469985962	1.0	0.782608695652174	0.8333333333333334	0.7377049180327869	0.7855191256830601	0.7377049180327869	0.8333333333333334	0.782608695652174	6.787556886672974	1.0	0.7130434782608696	0.71875	0.7058823529411765	0.7103825136612021	0.7540983606557377	0.6666666666666666	0.7108571428571429	10.60898494720459	1.0	0.7652173913043478	0.7741935483870968	0.7547169811320755	0.76381299332119	0.7868852459016393	0.7407407407407407	0.764075678139959	12.391113042831421	1.0	0.6086956521739131	0.5769230769230769	0.9090909090909091	0.5843958712811171	0.9836065573770492	0.18518518518518517	0.5174825174825174	12.042839527130127	1.0	0.7043478260869566	0.6956521739130435	0.717391304347826
7	1.0	0.7565217391304347	0.7272727272727273	0.7833333333333333	0.7563907486305539	0.7547169811320755	0.7580645161290323	0.7556162720097146	1.6660611629486084	1.0	0.7130434782608696	0.6851851851851852	0.7377049180327869	0.7119598295800365	0.6981132075471698	0.7258064516129032	0.7116480510599499	7.093487024307251	1.0	0.7391304347826086	0.6575342465753424	0.8809523809523809	0.7512172854534389	0.9056603773584906	0.5967741935483871	0.7367216117216118	10.4303560256958	1.0	0.7130434782608696	0.6785714285714286	0.7457627118644068	0.7133292757151553	0.7169811320754716	0.7096774193548387	0.7122602168473728	12.190649032592773	1.0	0.6086956521739131	0.5645161290322581	0.660377358490566	0.6124467437614121	0.660377358490566	0.5645161290322581	0.6086956521739131	12.058964014053345	1.0	0.7217391304347827	0.6779661016949152	0.7678571428571429
8	1.0	0.7043478260869566	0.7049180327868853	0.7037037037037037	0.7036924939467313	0.7288135593220338	0.6785714285714286	0.7037878787878787	1.5078973770141602	1.0	0.7739130434782608	0.7894736842105263	0.7586206896551724	0.7742130750605327	0.7627118644067796	0.7857142857142857	0.7738959467634603	7.426681756973267	1.0	0.808695652173913	0.7681159420289855	0.8695652173913043	0.8062953995157385	0.8983050847457628	0.7142857142857143	0.806219362745098	10.559934139251709	1.0	0.7304347826086957	0.7333333333333333	0.7272727272727273	0.7300242130750605	0.7457627118644068	0.7142857142857143	0.7301082595200243	11.691073417663574	1.0	0.6086956521739131	0.609375	0.6078431372549019	0.6072941888619855	0.6610169491525424	0.5535714285714286	0.6067927968999316	11.792036771774292	1.0	0.7478260869565218	0.7419354838709677	0.7547169811320755
9	1.0	0.7739130434782608	0.8214285714285714	0.7288135593220338	0.7766281192939745	0.7419354838709677	0.8113207547169812	0.7737590799031477	1.643153429031372	1.0	0.782608695652174	0.8490566037735849	0.7258064516129032	0.7874315276932441	0.7258064516129032	0.8490566037735849	0.782608695652174	6.547162294387817	1.0	0.7913043478260869	0.7878787878787878	0.7959183673469388	0.7872793670115642	0.8387096774193549	0.7358490566037735	0.7886029411764706	10.398446798324585	1.0	0.6782608695652174	0.7192982456140351	0.6379310344827587	0.6797017650639074	0.6612903225806451	0.6981132075471698	0.6778711484593838	11.475776672363281	1.0	0.5391304347826087	0.7647058823529411	0.5	0.5671028606208156	0.20967741935483872	0.9245283018867925	0.4890602732835946	11.884952545166016	1.0	0.7217391304347827	0.7586206896551724	0.6842105263157895
10	2.0	0.7586206896551724	0.7166666666666667	0.8035714285714286	0.7610513739545998	0.7962962962962963	0.7258064516129032	0.7585489146595301	1.7491328716278076	2.0	0.7931034482758621	0.7678571428571429	0.8166666666666667	0.7933094384707288	0.7962962962962963	0.7903225806451613	0.7925484351713861	6.574547529220581	2.0	0.75	0.6984126984126984	0.8113207547169812	0.7541816009557945	0.8148148148148148	0.6935483870967742	0.749981419546637	10.60550570487976	2.0	0.8017241379310345	0.803921568627451	0.8	0.798984468339307	0.7592592592592593	0.8387096774193549	0.7999250093738284	13.298764944076538	2.0	0.6206896551724138	0.5925925925925926	0.6451612903225806	0.6188769414575865	0.5925925925925926	0.6451612903225806	0.6188769414575865	12.641303539276123	2.0	0.6896551724137931	0.65	0.7321428571428571
11	2.0	0.7739130434782608	0.7241379310344828	0.8245614035087719	0.7768620268620269	0.8076923076923077	0.746031746031746	0.7734848484848484	1.717348337173462	2.0	0.7652173913043478	0.7272727272727273	0.8	0.7655677655677655	0.7692307692307693	0.7619047619047619	0.7640756781399589	6.605490207672119	2.0	0.7391304347826086	0.6571428571428571	0.8666666666666667	0.7518315018315018	0.8846153846153846	0.6190476190476191	0.73816029143898	10.768980503082275	2.0	0.808695652173913	0.7884615384615384	0.8253968253968254	0.806929181929182	0.7884615384615384	0.8253968253968254	0.806929181929182	12.06259298324585	2.0	0.6434782608695652	0.72	0.6222222222222222	0.6175213675213675	0.34615384615384615	0.8888888888888888	0.5997793056616586	12.708051204681396	2.0	0.6347826086956522	0.6086956521739131	0.6521739130434783
12	2.0	0.7739130434782608	0.7169811320754716	0.8225806451612904	0.7741187384044527	0.7755102040816326	0.7727272727272727	0.7709865196078431	1.7036798000335693	2.0	0.7652173913043478	0.6896551724137931	0.8421052631578947	0.7717996289424861	0.8163265306122449	0.7272727272727273	0.764075678139959	6.41947865486145	2.0	0.8260869565217391	0.7301587301587301	0.9423076923076923	0.840599876314162	0.9387755102040817	0.7424242424242424	0.8259685230024213	11.26822304725647	2.0	0.7478260869565218	0.7	0.7846153846153846	0.7435064935064934	0.7142857142857143	0.7727272727272727	0.7428483306345902	12.476503849029541	2.0	0.6347826086956522	0.5573770491803278	0.7222222222222222	0.6423933209647495	0.6938775510204082	0.5909090909090909	0.634090909090909	12.633394718170166	2.0	0.6608695652173913	0.5675675675675675	0.8292682926829268
13	2.0	0.782608695652174	0.8333333333333334	0.7377049180327869	0.7855191256830601	0.7377049180327869	0.8333333333333334	0.782608695652174	1.6052343845367432	2.0	0.8	0.8392857142857143	0.7627118644067796	0.8019125683060109	0.7704918032786885	0.8333333333333334	0.799939490204977	6.7671897411346436	2.0	0.7565217391304347	0.7619047619047619	0.75	0.7545537340619308	0.7868852459016393	0.7222222222222222	0.7550213024954351	10.373108863830566	2.0	0.7478260869565218	0.8076923076923077	0.6984126984126984	0.7516697024893746	0.6885245901639344	0.8148148148148148	0.7477497919975795	12.772825002670288	2.0	0.6956521739130435	0.7321428571428571	0.6610169491525424	0.6971766848816029	0.6721311475409836	0.7222222222222222	0.6955600937901822	12.102294445037842	2.0	0.7739130434782608	0.7777777777777778	0.7692307692307693
14	2.0	0.7913043478260869	0.8269230769230769	0.7619047619047619	0.7917422867513612	0.7413793103448276	0.8421052631578947	0.7909090909090909	1.5986380577087402	2.0	0.7913043478260869	0.8541666666666666	0.746268656716418	0.7920447670901392	0.7068965517241379	0.8771929824561403	0.7900182592818015	6.51447319984436	2.0	0.7043478260869566	0.7068965517241379	0.7017543859649122	0.7043254688445251	0.7068965517241379	0.7017543859649122	0.7043254688445251	9.510471820831299	2.0	0.7391304347826086	0.78	0.7076923076923077	0.7397156684815487	0.6724137931034483	0.8070175438596491	0.73816029143898	11.990680456161499	2.0	0.6434782608695652	0.5977011494252874	0.7857142857142857	0.6412583182093163	0.896551724137931	0.38596491228070173	0.6174442190669371	12.170037031173706	2.0	0.7652173913043478	0.746031746031746	0.7884615384615384
15	2.0	0.7913043478260869	0.8135593220338984	0.7678571428571429	0.7915907710989678	0.7868852459016393	0.7962962962962963	0.790909090909091	1.5573756694793701	2.0	0.7565217391304347	0.7323943661971831	0.7954545454545454	0.7503035822707953	0.8524590163934426	0.6481481481481481	0.7510822510822511	6.349663496017456	2.0	0.7565217391304347	0.7538461538461538	0.76	0.7534911961141469	0.8032786885245902	0.7037037037037037	0.7542735042735043	10.059587478637695	2.0	0.808695652173913	0.8421052631578947	0.7758620689655172	0.8101092896174864	0.7868852459016393	0.8333333333333334	0.8085653753026634	11.389996528625488	2.0	0.5826086956521739	0.696969696969697	0.5365853658536586	0.5959319975713417	0.3770491803278688	0.8148148148148148	0.5682102628285357	12.459408521652222	2.0	0.6608695652173913	0.775	0.6
16	2.0	0.7739130434782608	0.7692307692307693	0.78	0.7709471766848817	0.819672131147541	0.7222222222222222	0.771825396825397	1.9319360256195068	2.0	0.7565217391304347	0.7894736842105263	0.7241379310344828	0.7577413479052824	0.7377049180327869	0.7777777777777778	0.7563559322033899	6.692244529724121	2.0	0.7130434782608696	0.7	0.7333333333333333	0.7071948998178507	0.8032786885245902	0.6111111111111112	0.7073791348600509	10.119656562805176	2.0	0.7652173913043478	0.7833333333333333	0.7454545454545455	0.7648755312689739	0.7704918032786885	0.7592592592592593	0.7645765410569414	12.368324756622314	2.0	0.6260869565217392	0.8461538461538461	0.5617977528089888	0.643290831815422	0.36065573770491804	0.9259259259259259	0.6025239128687404	12.732540845870972	2.0	0.6434782608695652	0.6666666666666666	0.6181818181818182
17	2.0	0.7652173913043478	0.76	0.7692307692307693	0.7617163724893488	0.7169811320754716	0.8064516129032258	0.7626328262365262	1.731416940689087	2.0	0.7130434782608696	0.6666666666666666	0.7636363636363637	0.7160681679853926	0.7547169811320755	0.6774193548387096	0.7129566598593148	6.633037567138672	2.0	0.7217391304347827	0.6438356164383562	0.8571428571428571	0.7337188070602556	0.8867924528301887	0.5806451612903226	0.7191697191697192	10.689850568771362	2.0	0.7304347826086957	0.7037037037037037	0.7540983606557377	0.7294583079732198	0.7169811320754716	0.7419354838709677	0.7291239267532863	12.308829069137573	2.0	0.6608695652173913	0.6060606060606061	0.7346938775510204	0.6676810712111991	0.7547169811320755	0.5806451612903226	0.6604587781058369	13.027335405349731	2.0	0.7043478260869566	0.7209302325581395	0.6944444444444444
18	2.0	0.7130434782608696	0.7321428571428571	0.6949152542372882	0.7135290556900726	0.6949152542372882	0.7321428571428571	0.7130434782608696	1.5292928218841553	2.0	0.7391304347826086	0.7543859649122807	0.7241379310344828	0.7394067796610169	0.7288135593220338	0.75	0.7391107078039928	6.622504949569702	2.0	0.7913043478260869	0.7464788732394366	0.8636363636363636	0.7884382566585957	0.8983050847457628	0.6785714285714286	0.7876923076923077	11.071439981460571	2.0	0.7391304347826086	0.7457627118644068	0.7321428571428571	0.7389527845036319	0.7457627118644068	0.7321428571428571	0.7389527845036319	11.966604709625244	2.0	0.6782608695652174	0.6571428571428571	0.7111111111111111	0.6755447941888619	0.7796610169491526	0.5714285714285714	0.6734208304551386	12.633179903030396	2.0	0.6869565217391305	0.6949152542372882	0.6785714285714286
19	2.0	0.7478260869565218	0.8113207547169812	0.6935483870967742	0.7524345709068777	0.6935483870967742	0.8113207547169812	0.7478260869565218	1.5971319675445557	2.0	0.7652173913043478	0.8301886792452831	0.7096774193548387	0.7699330493000609	0.7096774193548387	0.8301886792452831	0.7652173913043478	6.488691568374634	2.0	0.8260869565217391	0.8088235294117647	0.851063829787234	0.8209068776628119	0.8870967741935484	0.7547169811320755	0.8230769230769232	10.863432884216309	2.0	0.6695652173913044	0.7068965517241379	0.631578947368421	0.6702678027997565	0.6612903225806451	0.6792452830188679	0.668939393939394	10.90405797958374	2.0	0.6173913043478261	0.8	0.5529411764705883	0.6369446135118686	0.3870967741935484	0.8867924528301887	0.6014492753623188	12.50323748588562	2.0	0.7217391304347827	0.7419354838709677	0.6981132075471698
20	3.0	0.7672413793103449	0.7213114754098361	0.8181818181818182	0.770310633213859	0.8148148148148148	0.7258064516129032	0.7672240802675585	1.734492301940918	3.0	0.7931034482758621	0.75	0.8392857142857143	0.7956989247311828	0.8333333333333334	0.7580645161290323	0.7930419268510258	6.606268644332886	3.0	0.7413793103448276	0.6875	0.8076923076923077	0.7461170848267622	0.8148148148148148	0.6774193548387096	0.7413024085637823	10.373029470443726	3.0	0.8362068965517241	0.8070175438596491	0.864406779661017	0.8372162485065711	0.8518518518518519	0.8225806451612904	0.8359020177201995	12.84462594985962	3.0	0.6896551724137931	0.6666666666666666	0.7096774193548387	0.6881720430107527	0.6666666666666666	0.7096774193548387	0.6881720430107527	13.42332911491394	3.0	0.6982758620689655	0.6610169491525424	0.7368421052631579
21	3.0	0.8	0.7843137254901961	0.8125	0.7973137973137974	0.7692307692307693	0.8253968253968254	0.7977983334607446	1.649334192276001	3.0	0.782608695652174	0.7368421052631579	0.8275862068965517	0.7847985347985348	0.8076923076923077	0.7619047619047619	0.7820153157934644	6.973729372024536	3.0	0.7391304347826086	0.6571428571428571	0.8666666666666667	0.7518315018315018	0.8846153846153846	0.6190476190476191	0.73816029143898	11.464747190475464	3.0	0.7652173913043478	0.7450980392156863	0.78125	0.7622100122100122	0.7307692307692307	0.7936507936507936	0.7626328262365263	12.190640926361084	3.0	0.6695652173913044	0.6029411764705882	0.7659574468085106	0.679945054945055	0.7884615384615384	0.5714285714285714	0.668939393939394	12.937828540802002	3.0	0.6173913043478261	0.5869565217391305	0.6376811594202898
22	3.0	0.808695652173913	0.7872340425531915	0.8235294117647058	0.8017934446505874	0.7551020408163265	0.8484848484848485	0.8033271144278606	1.6042633056640625	3.0	0.7913043478260869	0.7192982456140351	0.8620689655172413	0.7971552257266543	0.8367346938775511	0.7575757575757576	0.7900182592818015	6.630617618560791	3.0	0.8173913043478261	0.71875	0.9411764705882353	0.8330241187384044	0.9387755102040817	0.7272727272727273	0.8173360562741093	10.983326196670532	3.0	0.7913043478260869	0.7777777777777778	0.8	0.7813852813852814	0.7142857142857143	0.8484848484848485	0.7841051314142679	13.875970125198364	3.0	0.7478260869565218	0.6785714285714286	0.8135593220338984	0.75139146567718	0.7755102040816326	0.7272727272727273	0.7459047619047618	12.66481614112854	3.0	0.7478260869565218	0.6666666666666666	0.8363636363636363
23	3.0	0.7913043478260869	0.8490566037735849	0.7419354838709677	0.7947783849423193	0.7377049180327869	0.8518518518518519	0.7912885662431942	1.4634466171264648	3.0	0.8	0.8392857142857143	0.7627118644067796	0.8019125683060109	0.7704918032786885	0.8333333333333334	0.799939490204977	6.539393901824951	3.0	0.7478260869565218	0.7424242424242424	0.7551020408163265	0.7442319368548878	0.8032786885245902	0.6851851851851852	0.7450500726244171	10.436383962631226	3.0	0.7043478260869566	0.7368421052631579	0.6724137931034483	0.7053734061930783	0.6885245901639344	0.7222222222222222	0.7041464891041161	12.720224618911743	3.0	0.7304347826086957	0.7678571428571429	0.6949152542372882	0.7320886460230722	0.7049180327868853	0.7592592592592593	0.7303532259284472	12.770896673202515	3.0	0.7739130434782608	0.7966101694915254	0.75
24	3.0	0.808695652173913	0.8333333333333334	0.7868852459016393	0.808983666061706	0.7758620689655172	0.8421052631578947	0.8085653753026634	1.5948691368103027	3.0	0.7652173913043478	0.7924528301886793	0.7419354838709677	0.7655777374470659	0.7241379310344828	0.8070175438596491	0.7649330002271177	6.649407625198364	3.0	0.6956521739130435	0.6949152542372882	0.6964285714285714	0.6955535390199636	0.7068965517241379	0.6842105263157895	0.6955600937901822	10.761946439743042	3.0	0.7565217391304347	0.7777777777777778	0.7377049180327869	0.7568058076225046	0.7241379310344828	0.7894736842105263	0.7563559322033899	12.108286619186401	3.0	0.591304347826087	0.6	0.5833333333333334	0.5915003024803388	0.5689655172413793	0.6140350877192983	0.5911806973753877	12.671155214309692	3.0	0.7478260869565218	0.7457627118644068	0.75
25	3.0	0.7739130434782608	0.7868852459016393	0.7592592592592593	0.7730722525804493	0.7868852459016393	0.7592592592592593	0.7730722525804492	1.5134692192077637	3.0	0.7478260869565218	0.7424242424242424	0.7551020408163265	0.7442319368548878	0.8032786885245902	0.6851851851851852	0.7450500726244171	6.241179943084717	3.0	0.7304347826086957	0.7142857142857143	0.7555555555555555	0.7246508803885854	0.819672131147541	0.6296296296296297	0.7251137327473205	10.447469711303711	3.0	0.7913043478260869	0.8363636363636363	0.75	0.7937158469945356	0.7540983606557377	0.8333333333333334	0.7912885662431941	11.50393557548523	3.0	0.6521739130434783	0.6567164179104478	0.6458333333333334	0.6476927747419551	0.7213114754098361	0.5740740740740741	0.647671568627451	12.72239375114441	3.0	0.6347826086956522	0.6610169491525424	0.6071428571428571
26	3.0	0.7739130434782608	0.7966101694915254	0.75	0.7741347905282332	0.7704918032786885	0.7777777777777778	0.7734848484848486	1.9044122695922852	3.0	0.8	0.8392857142857143	0.7627118644067796	0.8019125683060109	0.7704918032786885	0.8333333333333334	0.799939490204977	6.777214527130127	3.0	0.7043478260869566	0.7213114754098361	0.6851851851851852	0.7032483302975107	0.7213114754098361	0.6851851851851852	0.7032483302975108	10.376910924911499	3.0	0.7739130434782608	0.7868852459016393	0.7592592592592593	0.7730722525804493	0.7868852459016393	0.7592592592592593	0.7730722525804492	12.561075448989868	3.0	0.7043478260869566	0.8648648648648649	0.6282051282051282	0.7159987856709169	0.5245901639344263	0.9074074074074074	0.6977427334570191	12.455092430114746	3.0	0.7043478260869566	0.6901408450704225	0.7272727272727273
27	3.0	0.7739130434782608	0.7454545454545455	0.8	0.7738892270237371	0.7735849056603774	0.7741935483870968	0.7730722525804493	1.6480348110198975	3.0	0.7130434782608696	0.6785714285714286	0.7457627118644068	0.7133292757151553	0.7169811320754716	0.7096774193548387	0.7122602168473728	6.456977605819702	3.0	0.7391304347826086	0.6619718309859155	0.8636363636363636	0.7498478393183201	0.8867924528301887	0.6129032258064516	0.737522824102252	10.647298812866211	3.0	0.7130434782608696	0.6724137931034483	0.7543859649122807	0.7146987218502738	0.7358490566037735	0.6935483870967742	0.7126958891664774	12.596935272216797	3.0	0.6260869565217392	0.5757575757575758	0.6938775510204082	0.6326841144248325	0.7169811320754716	0.5483870967741935	0.6256340373987432	13.298995971679688	3.0	0.6434782608695652	0.6	0.6909090909090909
28	3.0	0.7217391304347827	0.7288135593220338	0.7142857142857143	0.7215496368038741	0.7288135593220338	0.7142857142857143	0.7215496368038741	1.517028570175171	3.0	0.7130434782608696	0.7321428571428571	0.6949152542372882	0.7135290556900726	0.6949152542372882	0.7321428571428571	0.7130434782608696	6.690268516540527	3.0	0.8	0.75	0.8837209302325582	0.7969128329297821	0.9152542372881356	0.6785714285714286	0.796052124296399	10.582945346832275	3.0	0.7217391304347827	0.7213114754098361	0.7222222222222222	0.7210956416464891	0.7457627118644068	0.6964285714285714	0.7212121212121212	11.672509670257568	3.0	0.6782608695652174	0.6617647058823529	0.7021276595744681	0.6759987893462469	0.7627118644067796	0.5892857142857143	0.6747190581759803	13.161297082901001	3.0	0.6869565217391305	0.676923076923077	0.7
29	3.0	0.7304347826086957	0.803921568627451	0.671875	0.7363055386488131	0.6612903225806451	0.8113207547169812	0.7303532259284471	1.5631237030029297	3.0	0.7652173913043478	0.8070175438596491	0.7241379310344828	0.7671941570298235	0.7419354838709677	0.7924528301886793	0.7649330002271177	6.671448230743408	3.0	0.8173913043478261	0.7971014492753623	0.8478260869565217	0.811472915398661	0.8870967741935484	0.7358490566037735	0.8137867221836688	10.898292541503906	3.0	0.7130434782608696	0.7543859649122807	0.6724137931034483	0.7146987218502738	0.6935483870967742	0.7358490566037735	0.7126958891664774	11.601676940917969	3.0	0.7304347826086957	0.7313432835820896	0.7291666666666666	0.7253499695678636	0.7903225806451613	0.660377358490566	0.7263796147056567	13.604243993759155	3.0	0.6869565217391305	0.7407407407407407	0.639344262295082
30	4.0	0.7327586206896551	0.7090909090909091	0.7540983606557377	0.7320788530465949	0.7222222222222222	0.7419354838709677	0.7317819049750129	1.6926836967468262	4.0	0.7758620689655172	0.75	0.8	0.7759856630824373	0.7777777777777778	0.7741935483870968	0.7752608047690015	6.577057838439941	4.0	0.7327586206896551	0.676923076923077	0.803921568627451	0.73805256869773	0.8148148148148148	0.6612903225806451	0.7325797575667434	10.607078075408936	4.0	0.8362068965517241	0.8723404255319149	0.8115942028985508	0.831242532855436	0.7592592592592593	0.9032258064516129	0.8334215100899403	12.887511730194092	4.0	0.7241379310344828	0.7037037037037037	0.7419354838709677	0.7228195937873357	0.7037037037037037	0.7419354838709677	0.7228195937873357	13.994715929031372	4.0	0.7068965517241379	0.6351351351351351	0.8333333333333334
31	4.0	0.8	0.7543859649122807	0.8448275862068966	0.8023504273504274	0.8269230769230769	0.7777777777777778	0.7994540905299872	1.5656299591064453	4.0	0.7913043478260869	0.7413793103448276	0.8421052631578947	0.7944139194139194	0.8269230769230769	0.7619047619047619	0.7909090909090909	6.599720478057861	4.0	0.7304347826086957	0.647887323943662	0.8636363636363636	0.7438949938949939	0.8846153846153846	0.6031746031746031	0.7291239267532862	10.474198341369629	4.0	0.7652173913043478	0.7358490566037735	0.7903225806451613	0.7638888888888888	0.75	0.7777777777777778	0.7634285714285713	12.15645718574524	4.0	0.7565217391304347	0.6875	0.8431372549019608	0.7643467643467643	0.8461538461538461	0.6825396825396826	0.7565033272837265	15.322490692138672	4.0	0.591304347826087	0.5490196078431373	0.625
32	4.0	0.8260869565217391	0.7843137254901961	0.859375	0.8248299319727892	0.8163265306122449	0.8333333333333334	0.823076923076923	1.386291742324829	4.0	0.7739130434782608	0.7017543859649122	0.8448275862068966	0.7793753865182437	0.8163265306122449	0.7424242424242424	0.7725197808886184	6.729797124862671	4.0	0.8173913043478261	0.71875	0.9411764705882353	0.8330241187384044	0.9387755102040817	0.7272727272727273	0.8173360562741093	10.901155471801758	4.0	0.7739130434782608	0.7674418604651163	0.7777777777777778	0.7609771181199753	0.673469387755102	0.8484848484848485	0.7644927536231882	13.083426475524902	4.0	0.782608695652174	0.7222222222222222	0.8360655737704918	0.7843228200371057	0.7959183673469388	0.7727272727272727	0.7802155798486354	13.616185665130615	4.0	0.7217391304347827	0.6440677966101694	0.8035714285714286
33	4.0	0.7739130434782608	0.8431372549019608	0.71875	0.7783849423193685	0.7049180327868853	0.8518518518518519	0.7737590799031477	1.448892593383789	4.0	0.8	0.8518518518518519	0.7540983606557377	0.8029751062537948	0.7540983606557377	0.8518518518518519	0.7999999999999999	6.603130102157593	4.0	0.7391304347826086	0.7384615384615385	0.74	0.7360352155434122	0.7868852459016393	0.6851851851851852	0.7367216117216117	10.500163316726685	4.0	0.7130434782608696	0.7413793103448276	0.6842105263157895	0.7135701275045537	0.7049180327868853	0.7222222222222222	0.7126958891664774	11.384215593338013	4.0	0.7043478260869566	0.7288135593220338	0.6785714285714286	0.7043108682452945	0.7049180327868853	0.7037037037037037	0.7037878787878787	13.36852741241455	4.0	0.7652173913043478	0.7361111111111112	0.813953488372093
34	4.0	0.7739130434782608	0.8076923076923077	0.746031746031746	0.7743496672716274	0.7241379310344828	0.8245614035087719	0.7734848484848484	1.578094482421875	4.0	0.7478260869565218	0.8222222222222222	0.7	0.7487900786448881	0.6379310344827587	0.8596491228070176	0.7450500726244171	6.771034240722656	4.0	0.6956521739130435	0.6949152542372882	0.6964285714285714	0.6955535390199636	0.7068965517241379	0.6842105263157895	0.6955600937901822	10.57009506225586	4.0	0.7043478260869566	0.7307692307692307	0.6825396825396826	0.704779189352692	0.6551724137931034	0.7543859649122807	0.7037878787878789	12.387985467910767	4.0	0.6173913043478261	0.625	0.6101694915254238	0.617513611615245	0.603448275862069	0.631578947368421	0.617362371445856	13.089250326156616	4.0	0.7652173913043478	0.746031746031746	0.7884615384615384
35	4.0	0.8260869565217391	0.8360655737704918	0.8148148148148148	0.8254401942926533	0.8360655737704918	0.8148148148148148	0.8254401942926533	1.520338535308838	4.0	0.7478260869565218	0.7285714285714285	0.7777777777777778	0.74210686095932	0.8360655737704918	0.6481481481481481	0.7428483306345901	6.750853538513184	4.0	0.7565217391304347	0.7391304347826086	0.782608695652174	0.7513661202185793	0.8360655737704918	0.6666666666666666	0.7523076923076923	10.146783828735352	4.0	0.7652173913043478	0.7931034482758621	0.7368421052631579	0.7659380692167577	0.7540983606557377	0.7777777777777778	0.7649330002271177	11.446414947509766	4.0	0.6260869565217392	0.7142857142857143	0.5753424657534246	0.6347905282331512	0.4918032786885246	0.7777777777777778	0.6219707973396529	12.78541874885559	4.0	0.6434782608695652	0.6666666666666666	0.6181818181818182
36	4.0	0.7391304347826086	0.7627118644067796	0.7142857142857143	0.7392228293867638	0.7377049180327869	0.7407407407407407	0.7386363636363638	1.9281220436096191	4.0	0.7913043478260869	0.8490566037735849	0.7419354838709677	0.7947783849423193	0.7377049180327869	0.8518518518518519	0.7912885662431942	6.07012414932251	4.0	0.6782608695652174	0.6818181818181818	0.673469387755102	0.6744080145719491	0.7377049180327869	0.6111111111111112	0.6747190581759803	9.873717069625854	4.0	0.8173913043478261	0.8448275862068966	0.7894736842105263	0.8183060109289617	0.8032786885245902	0.8333333333333334	0.8171701112877584	12.287888765335083	4.0	0.8434782608695652	0.8524590163934426	0.8333333333333334	0.842896174863388	0.8524590163934426	0.8333333333333334	0.842896174863388	13.656636476516724	4.0	0.6956521739130435	0.7166666666666667	0.6727272727272727
37	4.0	0.7565217391304347	0.7192982456140351	0.7931034482758621	0.7577601947656726	0.7735849056603774	0.7419354838709677	0.7560606060606061	1.6788463592529297	4.0	0.6869565217391305	0.6440677966101694	0.7321428571428571	0.6891357273280584	0.7169811320754716	0.6612903225806451	0.6867433414043582	6.47072696685791	4.0	0.7478260869565218	0.6714285714285714	0.8666666666666667	0.7579123554473524	0.8867924528301887	0.6290322580645161	0.7465998024466226	10.947410821914673	4.0	0.7304347826086957	0.7037037037037037	0.7540983606557377	0.7294583079732198	0.7169811320754716	0.7419354838709677	0.7291239267532863	12.88709282875061	4.0	0.6782608695652174	0.6212121212121212	0.7551020408163265	0.6851795496043822	0.7735849056603774	0.5967741935483871	0.6778711484593838	13.208768606185913	4.0	0.6782608695652174	0.6428571428571429	0.711864406779661
38	4.0	0.7304347826086957	0.7258064516129032	0.7358490566037735	0.7295702179176755	0.7627118644067796	0.6964285714285714	0.7296989915838956	1.4944958686828613	4.0	0.7652173913043478	0.7758620689655172	0.7543859649122807	0.7652845036319613	0.7627118644067796	0.7678571428571429	0.7651463580667122	6.099748373031616	4.0	0.7652173913043478	0.7162162162162162	0.8536585365853658	0.7616525423728814	0.8983050847457628	0.625	0.7593209828695451	10.460326194763184	4.0	0.7304347826086957	0.7258064516129032	0.7358490566037735	0.7295702179176755	0.7627118644067796	0.6964285714285714	0.7296989915838956	11.727264165878296	4.0	0.6260869565217392	0.6111111111111112	0.6511627906976745	0.6228813559322034	0.7457627118644068	0.5	0.6187061454237026	13.769701719284058	4.0	0.6956521739130435	0.6935483870967742	0.6981132075471698
39	4.0	0.7652173913043478	0.8181818181818182	0.7166666666666667	0.7685636031649422	0.7258064516129032	0.8113207547169812	0.765146358066712	1.5704729557037354	4.0	0.782608695652174	0.8363636363636363	0.7333333333333333	0.7860620815581254	0.7419354838709677	0.8301886792452831	0.7825429241358445	5.467074871063232	4.0	0.8	0.7910447761194029	0.8125	0.7953438831405965	0.8548387096774194	0.7358490566037735	0.7969913270396807	10.683430433273315	4.0	0.7391304347826086	0.7580645161290323	0.7169811320754716	0.737522824102252	0.7580645161290323	0.7169811320754716	0.737522824102252	11.45452094078064	4.0	0.7304347826086957	0.7066666666666667	0.775	0.7198721850273889	0.8548387096774194	0.5849056603773585	0.7201946472019465	13.974342346191406	4.0	0.7217391304347827	0.7678571428571429	0.6779661016949152
40	5.0	0.7844827586206896	0.7457627118644068	0.8245614035087719	0.7864396654719235	0.8148148148148148	0.7580645161290323	0.7843385141667286	1.6818249225616455	5.0	0.7672413793103449	0.7454545454545455	0.7868852459016393	0.766726403823178	0.7592592592592593	0.7741935483870968	0.7663906914298502	6.912891626358032	5.0	0.7758620689655172	0.7121212121212122	0.86	0.7819593787335724	0.8703703703703703	0.6935483870967742	0.775595238095238	9.410710573196411	5.0	0.7672413793103449	0.7368421052631579	0.7966101694915254	0.7679211469534051	0.7777777777777778	0.7580645161290323	0.766808130444494	13.094627380371094	5.0	0.7327586206896551	0.7017543859649122	0.7627118644067796	0.733273596176822	0.7407407407407407	0.7258064516129032	0.7322611868066413	13.826305866241455	5.0	0.6896551724137931	0.6285714285714286	0.782608695652174
41	5.0	0.7565217391304347	0.7	0.8181818181818182	0.760989010989011	0.8076923076923077	0.7142857142857143	0.7563559322033899	1.6698813438415527	5.0	0.782608695652174	0.7142857142857143	0.8653846153846154	0.7898351648351649	0.8653846153846154	0.7142857142857143	0.7826086956521738	6.613758563995361	5.0	0.7478260869565218	0.6666666666666666	0.8695652173913043	0.7597680097680097	0.8846153846153846	0.6349206349206349	0.7471377663204185	9.59083342552185	5.0	0.7739130434782608	0.7407407407407407	0.8032786885245902	0.7735042735042735	0.7692307692307693	0.7777777777777778	0.7725197808886184	12.305867433547974	5.0	0.7652173913043478	0.7049180327868853	0.8333333333333334	0.7706043956043955	0.8269230769230769	0.7142857142857143	0.7651463580667119	14.446935653686523	5.0	0.6434782608695652	0.5964912280701754	0.6896551724137931
42	5.0	0.7913043478260869	0.7450980392156863	0.828125	0.7892702535559678	0.7755102040816326	0.803030303030303	0.7876923076923077	1.6009280681610107	5.0	0.808695652173913	0.7454545454545455	0.8666666666666667	0.8123067408781695	0.8367346938775511	0.7878787878787878	0.806929181929182	6.492481470108032	5.0	0.7913043478260869	0.6923076923076923	0.92	0.8076685219542363	0.9183673469387755	0.696969696969697	0.7912885662431941	11.234261989593506	5.0	0.7652173913043478	0.7115384615384616	0.8095238095238095	0.7639146567717996	0.7551020408163265	0.7727272727272727	0.7616854708726687	13.063127040863037	5.0	0.7652173913043478	0.7115384615384616	0.8095238095238095	0.7639146567717996	0.7551020408163265	0.7727272727272727	0.7616854708726687	14.23229193687439	5.0	0.7478260869565218	0.6785714285714286	0.8135593220338984
43	5.0	0.7913043478260869	0.8363636363636363	0.75	0.7937158469945356	0.7540983606557377	0.8333333333333334	0.7912885662431941	1.5532004833221436	5.0	0.7739130434782608	0.8181818181818182	0.7333333333333333	0.7762598664238008	0.7377049180327869	0.8148148148148148	0.7738959467634603	5.975944757461548	5.0	0.7478260869565218	0.75	0.7450980392156863	0.7452944748026715	0.7868852459016393	0.7037037037037037	0.745904761904762	10.065444231033325	5.0	0.7391304347826086	0.7627118644067796	0.7142857142857143	0.7392228293867638	0.7377049180327869	0.7407407407407407	0.7386363636363638	12.4517982006073	5.0	0.7391304347826086	0.7627118644067796	0.7142857142857143	0.7392228293867638	0.7377049180327869	0.7407407407407407	0.7386363636363638	14.095187664031982	5.0	0.7652173913043478	0.7833333333333333	0.7454545454545455
44	5.0	0.7913043478260869	0.8269230769230769	0.7619047619047619	0.7917422867513612	0.7413793103448276	0.8421052631578947	0.7909090909090909	1.580152988433838	5.0	0.7565217391304347	0.8260869565217391	0.7101449275362319	0.7574107683000605	0.6551724137931034	0.8596491228070176	0.7542735042735043	5.602229595184326	5.0	0.7130434782608696	0.7049180327868853	0.7222222222222222	0.7127949183303086	0.7413793103448276	0.6842105263157895	0.7126958891664774	10.510786056518555	5.0	0.808695652173913	0.8214285714285714	0.7966101694915254	0.808832425892317	0.7931034482758621	0.8245614035087719	0.808681185722928	12.022194623947144	5.0	0.6782608695652174	0.6721311475409836	0.6851851851851852	0.6780096793708409	0.7068965517241379	0.6491228070175439	0.6778711484593837	13.760974168777466	5.0	0.7565217391304347	0.75	0.7636363636363637
45	5.0	0.8	0.796875	0.803921568627451	0.7976624165148756	0.8360655737704918	0.7592592592592593	0.7984761904761905	1.518540382385254	5.0	0.7652173913043478	0.75	0.7872340425531915	0.7606253794778386	0.8360655737704918	0.6851851851851852	0.7616854708726687	5.812278509140015	5.0	0.7478260869565218	0.7424242424242424	0.7551020408163265	0.7442319368548878	0.8032786885245902	0.6851851851851852	0.7450500726244171	10.580957889556885	5.0	0.7739130434782608	0.8070175438596491	0.7413793103448276	0.775197328476017	0.7540983606557377	0.7962962962962963	0.7737590799031477	11.520352840423584	5.0	0.6347826086956522	0.7435897435897436	0.5789473684210527	0.6451123254401943	0.47540983606557374	0.8148148148148148	0.6284615384615384	13.66871690750122	5.0	0.6782608695652174	0.7222222222222222	0.639344262295082
46	5.0	0.8260869565217391	0.8153846153846154	0.84	0.8233151183970856	0.8688524590163934	0.7777777777777778	0.8244810744810744	1.8991279602050781	5.0	0.782608695652174	0.8103448275862069	0.7543859649122807	0.7833940497874924	0.7704918032786885	0.7962962962962963	0.7823453705806647	6.7877678871154785	5.0	0.7130434782608696	0.7121212121212122	0.7142857142857143	0.7093199757134183	0.7704918032786885	0.6481481481481481	0.7098845654001987	10.83875584602356	5.0	0.782608695652174	0.8	0.7636363636363637	0.7823315118397085	0.7868852459016393	0.7777777777777778	0.7820153157934643	12.436269044876099	5.0	0.8434782608695652	0.864406779661017	0.8214285714285714	0.8439587128111719	0.8360655737704918	0.8518518518518519	0.8431818181818183	13.703274250030518	5.0	0.7043478260869566	0.7014925373134329	0.7083333333333334
47	5.0	0.7391304347826086	0.7169811320754716	0.7580645161290323	0.737522824102252	0.7169811320754716	0.7580645161290323	0.737522824102252	1.693204402923584	5.0	0.7217391304347827	0.6909090909090909	0.75	0.7213937918441875	0.7169811320754716	0.7258064516129032	0.7207043108682454	6.601335287094116	5.0	0.7478260869565218	0.6714285714285714	0.8666666666666667	0.7579123554473524	0.8867924528301887	0.6290322580645161	0.7465998024466226	10.77143931388855	5.0	0.7391304347826086	0.7254901960784313	0.75	0.7361533779671332	0.6981132075471698	0.7741935483870968	0.7367216117216117	13.02161979675293	5.0	0.6782608695652174	0.6290322580645161	0.7358490566037735	0.6824406573341448	0.7358490566037735	0.6290322580645161	0.6782608695652174	14.414349555969238	5.0	0.7043478260869566	0.6727272727272727	0.7333333333333333
48	5.0	0.7391304347826086	0.7543859649122807	0.7241379310344828	0.7394067796610169	0.7288135593220338	0.75	0.7391107078039928	1.5254461765289307	5.0	0.7652173913043478	0.7857142857142857	0.7457627118644068	0.7657384987893463	0.7457627118644068	0.7857142857142857	0.7652173913043477	6.596916913986206	5.0	0.8	0.75	0.8837209302325582	0.7969128329297821	0.9152542372881356	0.6785714285714286	0.796052124296399	11.2167329788208	5.0	0.7217391304347827	0.7288135593220338	0.7142857142857143	0.7215496368038741	0.7288135593220338	0.7142857142857143	0.7215496368038741	11.746872425079346	5.0	0.6782608695652174	0.6666666666666666	0.6938775510204082	0.6764527845036319	0.7457627118644068	0.6071428571428571	0.6758095238095237	14.501849889755249	5.0	0.7217391304347827	0.7076923076923077	0.74
49	5.0	0.7739130434782608	0.8333333333333334	0.7213114754098361	0.7779975654290932	0.7258064516129032	0.8301886792452831	0.7738959467634603	1.5423460006713867	5.0	0.7739130434782608	0.8214285714285714	0.7288135593220338	0.7766281192939745	0.7419354838709677	0.8113207547169812	0.7737590799031477	7.056002855300903	5.0	0.8173913043478261	0.7971014492753623	0.8478260869565217	0.811472915398661	0.8870967741935484	0.7358490566037735	0.8137867221836688	10.517693996429443	5.0	0.7478260869565218	0.7796610169491526	0.7142857142857143	0.7483262325015216	0.7419354838709677	0.7547169811320755	0.7471377663204186	11.903267621994019	5.0	0.7043478260869566	0.71875	0.6862745098039216	0.7011564211807668	0.7419354838709677	0.660377358490566	0.7016178266178267	14.304205179214478	5.0	0.7304347826086957	0.746031746031746	0.7115384615384616
50	6.0	0.7586206896551724	0.7321428571428571	0.7833333333333333	0.7586618876941458	0.7592592592592593	0.7580645161290323	0.7579731743666169	1.668036699295044	6.0	0.7758620689655172	0.7413793103448276	0.8103448275862069	0.7771804062126643	0.7962962962962963	0.7580645161290323	0.7755952380952381	6.6284098625183105	6.0	0.7068965517241379	0.6470588235294118	0.7916666666666666	0.7138590203106332	0.8148148148148148	0.6129032258064516	0.7061102831594634	10.921834945678711	6.0	0.8017241379310345	0.8163265306122449	0.7910447761194029	0.79778972520908	0.7407407407407407	0.8548387096774194	0.7992022277414015	14.212700843811035	6.0	0.7241379310344828	0.6964285714285714	0.75	0.7240143369175627	0.7222222222222222	0.7258064516129032	0.723397913561848	14.36428689956665	6.0	0.6896551724137931	0.6363636363636364	0.76
51	6.0	0.782608695652174	0.7368421052631579	0.8275862068965517	0.7847985347985348	0.8076923076923077	0.7619047619047619	0.7820153157934644	1.658130168914795	6.0	0.8	0.7377049180327869	0.8703703703703703	0.8057081807081807	0.8653846153846154	0.746031746031746	0.799939490204977	6.258615970611572	6.0	0.7652173913043478	0.6865671641791045	0.875	0.7756410256410255	0.8846153846153846	0.6666666666666666	0.7649330002271179	10.809588193893433	6.0	0.7739130434782608	0.7321428571428571	0.8135593220338984	0.7751831501831501	0.7884615384615384	0.7619047619047619	0.7730722525804492	12.14884328842163	6.0	0.782608695652174	0.7368421052631579	0.8275862068965517	0.7847985347985348	0.8076923076923077	0.7619047619047619	0.7820153157934644	14.424161672592163	6.0	0.591304347826087	0.5471698113207547	0.6290322580645161
52	6.0	0.8260869565217391	0.8085106382978723	0.8382352941176471	0.8195732838589982	0.7755102040816326	0.8636363636363636	0.8212064676616915	1.609140157699585	6.0	0.7652173913043478	0.6896551724137931	0.8421052631578947	0.7717996289424861	0.8163265306122449	0.7272727272727273	0.764075678139959	5.553576469421387	6.0	0.8	0.696969696969697	0.9387755102040817	0.8178726035868893	0.9387755102040817	0.696969696969697	0.8000000000000002	10.983579397201538	6.0	0.7913043478260869	0.7659574468085106	0.8088235294117647	0.7840136054421769	0.7346938775510204	0.8333333333333334	0.7854477611940298	13.140423059463501	6.0	0.782608695652174	0.75	0.8059701492537313	0.7764378478664193	0.7346938775510204	0.8181818181818182	0.7771490582125418	14.103296279907227	6.0	0.7565217391304347	0.6909090909090909	0.8166666666666667
53	6.0	0.8	0.8653846153846154	0.746031746031746	0.8040376442015786	0.7377049180327869	0.8703703703703703	0.799939490204977	1.5006484985351562	6.0	0.782608695652174	0.8333333333333334	0.7377049180327869	0.7855191256830601	0.7377049180327869	0.8333333333333334	0.782608695652174	5.499344110488892	6.0	0.7391304347826086	0.7384615384615385	0.74	0.7360352155434122	0.7868852459016393	0.6851851851851852	0.7367216117216117	10.002992391586304	6.0	0.7391304347826086	0.803921568627451	0.6875	0.7434729811778992	0.6721311475409836	0.8148148148148148	0.7389527845036319	12.339251518249512	6.0	0.7304347826086957	0.7586206896551724	0.7017543859649122	0.7310261080752884	0.7213114754098361	0.7407407407407407	0.7301082595200241	13.05424451828003	6.0	0.782608695652174	0.7903225806451613	0.7735849056603774
54	6.0	0.782608695652174	0.8113207547169812	0.7580645161290323	0.7829703569267998	0.7413793103448276	0.8245614035087719	0.7823453705806647	1.5889742374420166	6.0	0.7565217391304347	0.7884615384615384	0.7301587301587301	0.7569570477918934	0.7068965517241379	0.8070175438596491	0.7560606060606061	5.783563137054443	6.0	0.6695652173913044	0.6923076923076923	0.6507936507936508	0.6699939503932244	0.6206896551724138	0.7192982456140351	0.668939393939394	10.421997547149658	6.0	0.7652173913043478	0.8297872340425532	0.7205882352941176	0.766031457955233	0.6724137931034483	0.8596491228070176	0.7634285714285713	11.721149206161499	6.0	0.7739130434782608	0.75	0.803921568627451	0.7734422262552934	0.8275862068965517	0.7192982456140351	0.7730722525804493	14.535726308822632	6.0	0.7304347826086957	0.7288135593220338	0.7321428571428571
55	6.0	0.782608695652174	0.8103448275862069	0.7543859649122807	0.7833940497874924	0.7704918032786885	0.7962962962962963	0.7823453705806647	1.527038335800171	6.0	0.7652173913043478	0.75	0.7872340425531915	0.7606253794778386	0.8360655737704918	0.6851851851851852	0.7616854708726687	5.415971994400024	6.0	0.7391304347826086	0.7313432835820896	0.75	0.7349726775956285	0.8032786885245902	0.6666666666666666	0.7357536764705883	10.773271083831787	6.0	0.7913043478260869	0.8245614035087719	0.7586206896551724	0.7926533090467516	0.7704918032786885	0.8148148148148148	0.7911622276029056	11.333980083465576	6.0	0.7130434782608696	0.7413793103448276	0.6842105263157895	0.7135701275045537	0.7049180327868853	0.7222222222222222	0.7126958891664774	14.332911968231201	6.0	0.6695652173913044	0.676923076923077	0.66
56	6.0	0.7913043478260869	0.7936507936507936	0.7884615384615384	0.7894656952034002	0.819672131147541	0.7592592592592593	0.7900182592818016	1.897019386291504	6.0	0.7652173913043478	0.8035714285714286	0.7288135593220338	0.7670006071645417	0.7377049180327869	0.7962962962962963	0.7651463580667122	5.709429979324341	6.0	0.7043478260869566	0.7014925373134329	0.7083333333333334	0.700060716454159	0.7704918032786885	0.6296296296296297	0.7005208333333334	10.257975816726685	6.0	0.7913043478260869	0.8135593220338984	0.7678571428571429	0.7915907710989678	0.7868852459016393	0.7962962962962963	0.790909090909091	12.77278995513916	6.0	0.8521739130434782	0.8928571428571429	0.8135593220338984	0.8542805100182149	0.819672131147541	0.8888888888888888	0.8521291884123743	14.741508722305298	6.0	0.6956521739130435	0.7166666666666667	0.6727272727272727
57	6.0	0.7739130434782608	0.7647058823529411	0.78125	0.7711503347534996	0.7358490566037735	0.8064516129032258	0.7718253968253967	1.7422678470611572	6.0	0.7130434782608696	0.6724137931034483	0.7543859649122807	0.7146987218502738	0.7358490566037735	0.6935483870967742	0.7126958891664774	6.477020978927612	6.0	0.7478260869565218	0.6714285714285714	0.8666666666666667	0.7579123554473524	0.8867924528301887	0.6290322580645161	0.7465998024466226	11.062209606170654	6.0	0.7130434782608696	0.6785714285714286	0.7457627118644068	0.7133292757151553	0.7169811320754716	0.7096774193548387	0.7122602168473728	12.664855480194092	6.0	0.7217391304347827	0.6666666666666666	0.7884615384615384	0.7268715763846623	0.7924528301886793	0.6612903225806451	0.7217180883242589	13.878574132919312	6.0	0.6956521739130435	0.6666666666666666	0.7213114754098361
58	6.0	0.7478260869565218	0.75	0.7454545454545455	0.7474273607748183	0.7627118644067796	0.7321428571428571	0.747520629873571	1.5679595470428467	6.0	0.7304347826086957	0.7413793103448276	0.7192982456140351	0.7304782082324455	0.7288135593220338	0.7321428571428571	0.7303532259284471	6.75847601890564	6.0	0.808695652173913	0.7681159420289855	0.8695652173913043	0.8062953995157385	0.8983050847457628	0.7142857142857143	0.806219362745098	10.483365058898926	6.0	0.7043478260869566	0.7049180327868853	0.7037037037037037	0.7036924939467313	0.7288135593220338	0.6785714285714286	0.7037878787878787	11.749280214309692	6.0	0.7130434782608696	0.6911764705882353	0.7446808510638298	0.7108050847457628	0.7966101694915254	0.625	0.7098845654001987	14.288713216781616	6.0	0.7304347826086957	0.7592592592592593	0.7049180327868853
59	6.0	0.7913043478260869	0.8518518518518519	0.7377049180327869	0.7954960438222763	0.7419354838709677	0.8490566037735849	0.7912885662431942	1.5863277912139893	6.0	0.7565217391304347	0.8035714285714286	0.711864406779661	0.7591296409007913	0.7258064516129032	0.7924528301886793	0.7563559322033899	5.715052843093872	6.0	0.782608695652174	0.7681159420289855	0.8043478260869565	0.7764759586122946	0.8548387096774194	0.6981132075471698	0.7783175264091294	10.354870319366455	6.0	0.6956521739130435	0.7213114754098361	0.6666666666666666	0.6944613511868534	0.7096774193548387	0.6792452830188679	0.6941721753666135	11.900387287139893	6.0	0.6347826086956522	0.7	0.5846153846153846	0.6407486305538649	0.5645161290322581	0.7169811320754716	0.6345338983050848	15.706283330917358	6.0	0.7391304347826086	0.7758620689655172	0.7017543859649122
60	7.0	0.7844827586206896	0.7377049180327869	0.8363636363636363	0.7876344086021505	0.8333333333333334	0.7419354838709677	0.7844667409884801	1.7650103569030762	7.0	0.8103448275862069	0.7758620689655172	0.8448275862068966	0.8118279569892473	0.8333333333333334	0.7903225806451613	0.8101190476190476	6.960175037384033	7.0	0.7672413793103449	0.6956521739130435	0.8723404255319149	0.7750896057347669	0.8888888888888888	0.6612903225806451	0.7663906914298502	10.282063484191895	7.0	0.8017241379310345	0.803921568627451	0.8	0.798984468339307	0.7592592592592593	0.8387096774193549	0.7999250093738284	12.739656925201416	7.0	0.7327586206896551	0.6949152542372882	0.7719298245614035	0.734468339307049	0.7592592592592593	0.7096774193548387	0.7325797575667434	15.681289434432983	7.0	0.75	0.6811594202898551	0.851063829787234
61	7.0	0.7652173913043478	0.7272727272727273	0.8	0.7655677655677655	0.7692307692307693	0.7619047619047619	0.7640756781399589	1.6709520816802979	7.0	0.782608695652174	0.7288135593220338	0.8392857142857143	0.7864774114774115	0.8269230769230769	0.746031746031746	0.7823453705806647	6.672559499740601	7.0	0.7304347826086957	0.647887323943662	0.8636363636363636	0.7438949938949939	0.8846153846153846	0.6031746031746031	0.7291239267532862	10.926535606384277	7.0	0.7478260869565218	0.7090909090909091	0.7833333333333333	0.748015873015873	0.75	0.746031746031746	0.7465998024466227	13.028655290603638	7.0	0.7478260869565218	0.6949152542372882	0.8035714285714286	0.7513736263736264	0.7884615384615384	0.7142857142857143	0.747520629873571	15.37110185623169	7.0	0.6434782608695652	0.5964912280701754	0.6896551724137931
62	7.0	0.8434782608695652	0.8444444444444444	0.8428571428571429	0.8347247990105133	0.7755102040816326	0.8939393939393939	0.8380788485607009	1.5929043292999268	7.0	0.7652173913043478	0.6833333333333333	0.8545454545454545	0.7744279529993816	0.8367346938775511	0.7121212121212122	0.7645765410569414	6.691340923309326	7.0	0.8260869565217391	0.7377049180327869	0.9259259259259259	0.8379715522572666	0.9183673469387755	0.7575757575757576	0.8257575757575758	11.93691349029541	7.0	0.8173913043478261	0.8181818181818182	0.8169014084507042	0.8067408781694496	0.7346938775510204	0.8787878787878788	0.8104544384271251	13.007651567459106	7.0	0.7739130434782608	0.7169811320754716	0.8225806451612904	0.7741187384044527	0.7755102040816326	0.7727272727272727	0.7709865196078431	15.557001829147339	7.0	0.7304347826086957	0.6551724137931034	0.8070175438596491
63	7.0	0.808695652173913	0.8979591836734694	0.7424242424242424	0.8143594414086217	0.7213114754098361	0.9074074074074074	0.8083333333333333	1.4573657512664795	7.0	0.782608695652174	0.8214285714285714	0.7457627118644068	0.7844565877352763	0.7540983606557377	0.8148148148148148	0.7825429241358446	6.568983554840088	7.0	0.7391304347826086	0.7246376811594203	0.7608695652173914	0.7339101396478446	0.819672131147541	0.6481481481481481	0.7346153846153847	10.309656858444214	7.0	0.7478260869565218	0.7962962962962963	0.7049180327868853	0.7506071645415908	0.7049180327868853	0.7962962962962963	0.7478260869565216	12.718988418579102	7.0	0.7304347826086957	0.7884615384615384	0.6825396825396826	0.73421372191864	0.6721311475409836	0.7962962962962963	0.7303532259284471	14.954505681991577	7.0	0.7913043478260869	0.7681159420289855	0.8260869565217391
64	7.0	0.808695652173913	0.8461538461538461	0.7777777777777778	0.809134906231095	0.7586206896551724	0.8596491228070176	0.8083333333333333	1.5503556728363037	7.0	0.7478260869565218	0.7959183673469388	0.7121212121212122	0.7484875983061101	0.6724137931034483	0.8245614035087719	0.7465998024466226	6.404305696487427	7.0	0.6782608695652174	0.7058823529411765	0.65625	0.6787658802177858	0.6206896551724138	0.7368421052631579	0.6773826673743271	10.328725337982178	7.0	0.7478260869565218	0.7843137254901961	0.71875	0.7483363581367211	0.6896551724137931	0.8070175438596491	0.7471377663204186	11.743304014205933	7.0	0.7478260869565218	0.7543859649122807	0.7413793103448276	0.7478826376285541	0.7413793103448276	0.7543859649122807	0.7478260869565219	15.386496782302856	7.0	0.7304347826086957	0.7142857142857143	0.75
65	7.0	0.782608695652174	0.8	0.7636363636363637	0.7823315118397085	0.7868852459016393	0.7777777777777778	0.7820153157934643	1.4992892742156982	7.0	0.7739130434782608	0.7692307692307693	0.78	0.7709471766848817	0.819672131147541	0.7222222222222222	0.771825396825397	5.956977844238281	7.0	0.7565217391304347	0.7391304347826086	0.782608695652174	0.7513661202185793	0.8360655737704918	0.6666666666666666	0.7523076923076923	10.185505151748657	7.0	0.7565217391304347	0.7894736842105263	0.7241379310344828	0.7577413479052824	0.7377049180327869	0.7777777777777778	0.7563559322033899	11.892733097076416	7.0	0.7217391304347827	0.7301587301587301	0.7115384615384616	0.7196417729204614	0.7540983606557377	0.6851851851851852	0.7200243457090687	14.623106479644775	7.0	0.6695652173913044	0.7017543859649122	0.6379310344827587
66	7.0	0.7565217391304347	0.7538461538461538	0.76	0.7534911961141469	0.8032786885245902	0.7037037037037037	0.7542735042735043	1.8836188316345215	7.0	0.8	0.8518518518518519	0.7540983606557377	0.8029751062537948	0.7540983606557377	0.8518518518518519	0.7999999999999999	5.924565076828003	7.0	0.6869565217391305	0.6984126984126984	0.6730769230769231	0.6847298117789922	0.7213114754098361	0.6481481481481481	0.6850273889227024	10.114897012710571	7.0	0.782608695652174	0.78125	0.7843137254901961	0.7802064359441409	0.819672131147541	0.7407407407407407	0.7809523809523808	12.49162769317627	7.0	0.8173913043478261	0.8125	0.8235294117647058	0.8151183970856102	0.8524590163934426	0.7777777777777778	0.8159999999999998	15.578730821609497	7.0	0.6869565217391305	0.6984126984126984	0.6730769230769231
67	7.0	0.7652173913043478	0.75	0.7777777777777778	0.7630858186244673	0.7358490566037735	0.7903225806451613	0.7634285714285713	1.6521341800689697	7.0	0.7217391304347827	0.6779661016949152	0.7678571428571429	0.7241326841144249	0.7547169811320755	0.6935483870967742	0.7215496368038741	5.549060821533203	7.0	0.7217391304347827	0.647887323943662	0.8409090909090909	0.732349360925137	0.8679245283018868	0.5967741935483871	0.7200243457090687	10.689778566360474	7.0	0.7217391304347827	0.6779661016949152	0.7678571428571429	0.7241326841144249	0.7547169811320755	0.6935483870967742	0.7215496368038741	12.197955846786499	7.0	0.7391304347826086	0.6949152542372882	0.7857142857142857	0.7416311625076081	0.7735849056603774	0.7096774193548387	0.7389527845036321	15.29498839378357	7.0	0.7043478260869566	0.6792452830188679	0.7258064516129032
68	7.0	0.7391304347826086	0.7636363636363637	0.7166666666666667	0.739860774818402	0.711864406779661	0.7678571428571429	0.7391107078039928	1.536302089691162	7.0	0.7652173913043478	0.7857142857142857	0.7457627118644068	0.7657384987893463	0.7457627118644068	0.7857142857142857	0.7652173913043477	5.801424980163574	7.0	0.8	0.75	0.8837209302325582	0.7969128329297821	0.9152542372881356	0.6785714285714286	0.796052124296399	10.775589942932129	7.0	0.7043478260869566	0.711864406779661	0.6964285714285714	0.7041464891041163	0.711864406779661	0.6964285714285714	0.7041464891041163	11.988573551177979	7.0	0.7043478260869566	0.6923076923076923	0.72	0.7027845036319613	0.7627118644067796	0.6428571428571429	0.7025258673158856	15.270008325576782	7.0	0.6956521739130435	0.7	0.6909090909090909
69	7.0	0.782608695652174	0.8490566037735849	0.7258064516129032	0.7874315276932441	0.7258064516129032	0.8490566037735849	0.782608695652174	1.6519198417663574	7.0	0.7565217391304347	0.7833333333333333	0.7272727272727273	0.7563907486305539	0.7580645161290323	0.7547169811320755	0.7556162720097146	5.517048120498657	7.0	0.7739130434782608	0.7647058823529411	0.7872340425531915	0.7684114424832623	0.8387096774193549	0.6981132075471698	0.77	10.96366262435913	7.0	0.7043478260869566	0.7258064516129032	0.6792452830188679	0.7025258673158856	0.7258064516129032	0.6792452830188679	0.7025258673158856	10.480987310409546	7.0	0.6869565217391305	0.7241379310344828	0.6491228070175439	0.6877662811929397	0.6774193548387096	0.6981132075471698	0.6863636363636364	15.621474027633667	7.0	0.7478260869565218	0.7704918032786885	0.7222222222222222
70	8.0	0.7586206896551724	0.7407407407407407	0.7741935483870968	0.7574671445639187	0.7407407407407407	0.7741935483870968	0.7574671445639187	1.6814403533935547	8.0	0.8017241379310345	0.7818181818181819	0.819672131147541	0.801373954599761	0.7962962962962963	0.8064516129032258	0.8009994778846872	7.070164203643799	8.0	0.7241379310344828	0.6527777777777778	0.8409090909090909	0.7335722819593787	0.8703703703703703	0.5967741935483871	0.722072476789458	10.288323163986206	8.0	0.8103448275862069	0.8333333333333334	0.7941176470588235	0.8058542413381122	0.7407407407407407	0.8709677419354839	0.8075414781297134	11.504573822021484	8.0	0.7586206896551724	0.7166666666666667	0.8035714285714286	0.7610513739545998	0.7962962962962963	0.7258064516129032	0.7585489146595301	15.997517585754395	8.0	0.7413793103448276	0.6818181818181818	0.82
71	8.0	0.7478260869565218	0.7090909090909091	0.7833333333333333	0.748015873015873	0.75	0.746031746031746	0.7465998024466227	1.646059513092041	8.0	0.8	0.7457627118644068	0.8571428571428571	0.8040293040293041	0.8461538461538461	0.7619047619047619	0.7997577409342116	6.405296087265015	8.0	0.7217391304347827	0.6428571428571429	0.8444444444444444	0.7342796092796093	0.8653846153846154	0.6031746031746031	0.7207043108682454	10.571165800094604	8.0	0.7652173913043478	0.7358490566037735	0.7903225806451613	0.7638888888888888	0.75	0.7777777777777778	0.7634285714285713	12.332431554794312	8.0	0.7217391304347827	0.7	0.7384615384615385	0.7174908424908425	0.6730769230769231	0.7619047619047619	0.7181372549019608	16.631239652633667	8.0	0.6695652173913044	0.64	0.6923076923076923
72	8.0	0.7739130434782608	0.7169811320754716	0.8225806451612904	0.7741187384044527	0.7755102040816326	0.7727272727272727	0.7709865196078431	1.6066575050354004	8.0	0.782608695652174	0.7068965517241379	0.8596491228070176	0.7895794681508967	0.8367346938775511	0.7424242424242424	0.7815515538332953	5.746421575546265	8.0	0.808695652173913	0.7076923076923077	0.94	0.8254483611626469	0.9387755102040817	0.7121212121212122	0.8086811857229281	11.161426782608032	8.0	0.7913043478260869	0.7777777777777778	0.8	0.7813852813852814	0.7142857142857143	0.8484848484848485	0.7841051314142679	13.107794523239136	8.0	0.8260869565217391	0.7843137254901961	0.859375	0.8248299319727892	0.8163265306122449	0.8333333333333334	0.823076923076923	15.712796688079834	8.0	0.7478260869565218	0.6851851851851852	0.8032786885245902
73	8.0	0.8521739130434782	0.8928571428571429	0.8135593220338984	0.8542805100182149	0.819672131147541	0.8888888888888888	0.8521291884123743	1.4717535972595215	8.0	0.782608695652174	0.8461538461538461	0.7301587301587301	0.786581663630844	0.7213114754098361	0.8518518518518519	0.7825429241358445	5.4393744468688965	8.0	0.7217391304347827	0.7301587301587301	0.7115384615384616	0.7196417729204614	0.7540983606557377	0.6851851851851852	0.7200243457090687	9.997965574264526	8.0	0.6956521739130435	0.7708333333333334	0.6417910447761194	0.7014268366727383	0.6065573770491803	0.7962962962962963	0.6948214421108498	12.48835802078247	8.0	0.6956521739130435	0.7407407407407407	0.6557377049180327	0.6982392228293868	0.6557377049180327	0.7407407407407407	0.6956521739130433	14.978527784347534	8.0	0.7652173913043478	0.7741935483870968	0.7547169811320755
74	8.0	0.808695652173913	0.8333333333333334	0.7868852459016393	0.808983666061706	0.7758620689655172	0.8421052631578947	0.8085653753026634	1.5469725131988525	8.0	0.7565217391304347	0.8	0.7230769230769231	0.7571082879612825	0.6896551724137931	0.8245614035087719	0.7556162720097146	5.392036437988281	8.0	0.7304347826086957	0.7368421052631579	0.7241379310344828	0.7304900181488203	0.7241379310344828	0.7368421052631579	0.7304347826086957	10.65201997756958	8.0	0.7304347826086957	0.7647058823529411	0.703125	0.7309437386569873	0.6724137931034483	0.7894736842105263	0.7296989915838956	11.961694717407227	8.0	0.7304347826086957	0.7288135593220338	0.7321428571428571	0.7303387779794314	0.7413793103448276	0.7192982456140351	0.7303532259284471	15.206660747528076	8.0	0.7217391304347827	0.703125	0.7450980392156863
75	8.0	0.7652173913043478	0.7833333333333333	0.7454545454545455	0.7648755312689739	0.7704918032786885	0.7592592592592593	0.7645765410569414	1.5172851085662842	8.0	0.7913043478260869	0.8032786885245902	0.7777777777777778	0.790528233151184	0.8032786885245902	0.7777777777777778	0.790528233151184	5.293050527572632	8.0	0.7565217391304347	0.7323943661971831	0.7954545454545454	0.7503035822707953	0.8524590163934426	0.6481481481481481	0.7510822510822511	10.47706651687622	8.0	0.7913043478260869	0.8363636363636363	0.75	0.7937158469945356	0.7540983606557377	0.8333333333333334	0.7912885662431941	11.244905233383179	8.0	0.7391304347826086	0.7627118644067796	0.7142857142857143	0.7392228293867638	0.7377049180327869	0.7407407407407407	0.7386363636363638	15.081453561782837	8.0	0.6782608695652174	0.6935483870967742	0.660377358490566
76	8.0	0.7478260869565218	0.75	0.7450980392156863	0.7452944748026715	0.7868852459016393	0.7037037037037037	0.745904761904762	1.9118566513061523	8.0	0.7913043478260869	0.8363636363636363	0.75	0.7937158469945356	0.7540983606557377	0.8333333333333334	0.7912885662431941	5.897693157196045	8.0	0.6695652173913044	0.6825396825396826	0.6538461538461539	0.6672738312082575	0.7049180327868853	0.6296296296296297	0.6675289105295192	10.153501987457275	8.0	0.7739130434782608	0.7777777777777778	0.7692307692307693	0.7720097146326654	0.8032786885245902	0.7407407407407407	0.7725197808886184	12.508301258087158	8.0	0.782608695652174	0.7903225806451613	0.7735849056603774	0.7812689738919247	0.8032786885245902	0.7592592592592593	0.7815515538332953	15.84344220161438	8.0	0.7043478260869566	0.7014925373134329	0.7083333333333334
77	8.0	0.7565217391304347	0.7272727272727273	0.7833333333333333	0.7563907486305539	0.7547169811320755	0.7580645161290323	0.7556162720097146	1.6481962203979492	8.0	0.7304347826086957	0.6896551724137931	0.7719298245614035	0.7321972002434571	0.7547169811320755	0.7096774193548387	0.7301082595200242	5.710128307342529	8.0	0.7478260869565218	0.6666666666666666	0.8837209302325582	0.7592818015824712	0.9056603773584906	0.6129032258064516	0.7459047619047618	10.590590476989746	8.0	0.7391304347826086	0.7169811320754716	0.7580645161290323	0.737522824102252	0.7169811320754716	0.7580645161290323	0.737522824102252	12.788974046707153	8.0	0.7565217391304347	0.7272727272727273	0.7833333333333333	0.7563907486305539	0.7547169811320755	0.7580645161290323	0.7556162720097146	15.371638298034668	8.0	0.7043478260869566	0.6727272727272727	0.7333333333333333
78	8.0	0.7130434782608696	0.703125	0.7254901960784313	0.7117130750605327	0.7627118644067796	0.6607142857142857	0.7116480510599499	1.4995362758636475	8.0	0.7565217391304347	0.7719298245614035	0.7413793103448276	0.7568099273607749	0.7457627118644068	0.7678571428571429	0.7565033272837265	5.6165337562561035	8.0	0.7739130434782608	0.726027397260274	0.8571428571428571	0.7705811138014529	0.8983050847457628	0.6428571428571429	0.7688620902906618	10.899299144744873	8.0	0.7217391304347827	0.7368421052631579	0.7068965517241379	0.722003631961259	0.711864406779661	0.7321428571428571	0.7217180883242589	11.829897403717041	8.0	0.7304347826086957	0.7121212121212122	0.7551020408163265	0.7286622276029056	0.7966101694915254	0.6607142857142857	0.7283809523809524	15.934101581573486	8.0	0.7565217391304347	0.7627118644067796	0.75
79	8.0	0.7565217391304347	0.8541666666666666	0.6865671641791045	0.764607425441266	0.6612903225806451	0.8679245283018868	0.7560606060606061	1.528393268585205	8.0	0.7565217391304347	0.8035714285714286	0.711864406779661	0.7591296409007913	0.7258064516129032	0.7924528301886793	0.7563559322033899	5.680266857147217	8.0	0.808695652173913	0.8125	0.803921568627451	0.8061472915398662	0.8387096774193549	0.7735849056603774	0.806929181929182	10.31227993965149	8.0	0.7043478260869566	0.7333333333333333	0.6727272727272727	0.7038953134510042	0.7096774193548387	0.6981132075471698	0.7032483302975107	11.700752019882202	8.0	0.6869565217391305	0.7321428571428571	0.6440677966101694	0.6891357273280584	0.6612903225806451	0.7169811320754716	0.6867433414043582	16.41688632965088	8.0	0.7478260869565218	0.7323943661971831	0.7727272727272727
80	9.0	0.7327586206896551	0.6949152542372882	0.7719298245614035	0.734468339307049	0.7592592592592593	0.7096774193548387	0.7325797575667434	1.6929991245269775	9.0	0.7586206896551724	0.7166666666666667	0.8035714285714286	0.7610513739545998	0.7962962962962963	0.7258064516129032	0.7585489146595301	6.4779157638549805	9.0	0.7672413793103449	0.7076923076923077	0.8431372549019608	0.772700119474313	0.8518518518518519	0.6935483870967742	0.767085595300067	10.833414316177368	9.0	0.8103448275862069	0.82	0.803030303030303	0.8070489844683393	0.7592592592592593	0.8548387096774194	0.8082932692307692	13.117454528808594	9.0	0.7413793103448276	0.6935483870967742	0.7962962962962963	0.7449223416965353	0.7962962962962963	0.6935483870967742	0.7413793103448276	16.449191331863403	9.0	0.6896551724137931	0.65	0.7321428571428571
81	9.0	0.782608695652174	0.7454545454545455	0.8166666666666667	0.7831196581196581	0.7884615384615384	0.7777777777777778	0.7815515538332953	1.6609501838684082	9.0	0.7739130434782608	0.7166666666666667	0.8363636363636363	0.7785409035409034	0.8269230769230769	0.7301587301587301	0.7737590799031477	6.096238374710083	9.0	0.7739130434782608	0.6911764705882353	0.8936170212765957	0.7852564102564102	0.9038461538461539	0.6666666666666666	0.7734848484848484	9.764829158782959	9.0	0.7565217391304347	0.7142857142857143	0.7966101694915254	0.7576312576312576	0.7692307692307693	0.746031746031746	0.7556162720097146	11.955200672149658	9.0	0.7217391304347827	0.6785714285714286	0.7627118644067796	0.7225274725274725	0.7307692307692307	0.7142857142857143	0.7207043108682454	16.588392972946167	9.0	0.7043478260869566	0.6875	0.7164179104477612
82	9.0	0.8260869565217391	0.8085106382978723	0.8382352941176471	0.8195732838589982	0.7755102040816326	0.8636363636363636	0.8212064676616915	1.6756319999694824	9.0	0.782608695652174	0.7068965517241379	0.8596491228070176	0.7895794681508967	0.8367346938775511	0.7424242424242424	0.7815515538332953	5.803510665893555	9.0	0.808695652173913	0.7076923076923077	0.94	0.8254483611626469	0.9387755102040817	0.7121212121212122	0.8086811857229281	10.44605040550232	9.0	0.7739130434782608	0.7555555555555555	0.7857142857142857	0.7636054421768708	0.6938775510204082	0.8333333333333334	0.7661138923654569	11.651828289031982	9.0	0.808695652173913	0.7547169811320755	0.8548387096774194	0.809678416821274	0.8163265306122449	0.803030303030303	0.8062193627450981	15.89052677154541	9.0	0.7217391304347827	0.6545454545454545	0.7833333333333333
83	9.0	0.808695652173913	0.8421052631578947	0.7758620689655172	0.8101092896174864	0.7868852459016393	0.8333333333333334	0.8085653753026634	1.475919246673584	9.0	0.8173913043478261	0.8571428571428571	0.7796610169491526	0.8193685488767456	0.7868852459016393	0.8518518518518519	0.8173360562741094	5.45796012878418	9.0	0.7391304347826086	0.7384615384615385	0.74	0.7360352155434122	0.7868852459016393	0.6851851851851852	0.7367216117216117	10.24677586555481	9.0	0.7565217391304347	0.8	0.7166666666666667	0.7588038858530661	0.7213114754098361	0.7962962962962963	0.7565033272837265	12.126550674438477	9.0	0.7130434782608696	0.7916666666666666	0.6567164179104478	0.7188828172434729	0.6229508196721312	0.8148148148148148	0.7122602168473728	15.69759464263916	9.0	0.7913043478260869	0.7605633802816901	0.8409090909090909
84	9.0	0.782608695652174	0.8235294117647058	0.75	0.7831215970961887	0.7241379310344828	0.8421052631578947	0.7820153157934642	1.5773262977600098	9.0	0.7652173913043478	0.803921568627451	0.734375	0.7657289776164549	0.7068965517241379	0.8245614035087719	0.7645765410569414	6.231033802032471	9.0	0.7304347826086957	0.7288135593220338	0.7321428571428571	0.7303387779794314	0.7413793103448276	0.7192982456140351	0.7303532259284471	10.345092296600342	9.0	0.7391304347826086	0.7692307692307693	0.7142857142857143	0.7395644283121597	0.6896551724137931	0.7894736842105263	0.7386363636363638	11.809504270553589	9.0	0.7130434782608696	0.711864406779661	0.7142857142857143	0.7129461584996974	0.7241379310344828	0.7017543859649122	0.7129566598593147	15.667498588562012	9.0	0.7217391304347827	0.7166666666666667	0.7272727272727273
85	9.0	0.7913043478260869	0.8032786885245902	0.7777777777777778	0.790528233151184	0.8032786885245902	0.7777777777777778	0.790528233151184	1.5292048454284668	9.0	0.808695652173913	0.819672131147541	0.7962962962962963	0.8079842137219186	0.819672131147541	0.7962962962962963	0.8079842137219186	6.461816310882568	9.0	0.7478260869565218	0.7424242424242424	0.7551020408163265	0.7442319368548878	0.8032786885245902	0.6851851851851852	0.7450500726244171	10.509554147720337	9.0	0.8	0.8166666666666667	0.7818181818181819	0.7997874924104432	0.8032786885245902	0.7962962962962963	0.7994540905299872	11.818432331085205	9.0	0.7565217391304347	0.7894736842105263	0.7241379310344828	0.7577413479052824	0.7377049180327869	0.7777777777777778	0.7563559322033899	15.322353839874268	9.0	0.6782608695652174	0.6935483870967742	0.660377358490566
86	9.0	0.782608695652174	0.7903225806451613	0.7735849056603774	0.7812689738919247	0.8032786885245902	0.7592592592592593	0.7815515538332953	1.879720687866211	9.0	0.7565217391304347	0.7894736842105263	0.7241379310344828	0.7577413479052824	0.7377049180327869	0.7777777777777778	0.7563559322033899	6.877241373062134	9.0	0.7130434782608696	0.7258064516129032	0.6981132075471698	0.7114450516089861	0.7377049180327869	0.6851851851851852	0.7116480510599499	10.247774600982666	9.0	0.7739130434782608	0.7966101694915254	0.75	0.7741347905282332	0.7704918032786885	0.7777777777777778	0.7734848484848486	12.662410259246826	9.0	0.7652173913043478	0.7575757575757576	0.7755102040816326	0.7616879174256224	0.819672131147541	0.7037037037037037	0.7626328262365263	16.401044607162476	9.0	0.7130434782608696	0.7258064516129032	0.6981132075471698
87	9.0	0.7304347826086957	0.7115384615384616	0.746031746031746	0.728088861838101	0.6981132075471698	0.7580645161290323	0.7283809523809524	1.655472993850708	9.0	0.7217391304347827	0.6842105263157895	0.7586206896551724	0.7227632379793061	0.7358490566037735	0.7096774193548387	0.7212121212121212	7.06775426864624	9.0	0.7304347826086957	0.6617647058823529	0.8297872340425532	0.7390444309190505	0.8490566037735849	0.6290322580645161	0.7296989915838956	10.62392807006836	9.0	0.7304347826086957	0.6964285714285714	0.7627118644067796	0.7308277541083383	0.7358490566037735	0.7258064516129032	0.7296989915838956	13.589820623397827	9.0	0.7217391304347827	0.6779661016949152	0.7678571428571429	0.7241326841144249	0.7547169811320755	0.6935483870967742	0.7215496368038741	15.944977283477783	9.0	0.7130434782608696	0.6785714285714286	0.7457627118644068
88	9.0	0.7217391304347827	0.7288135593220338	0.7142857142857143	0.7215496368038741	0.7288135593220338	0.7142857142857143	0.7215496368038741	1.5565025806427002	9.0	0.7304347826086957	0.7413793103448276	0.7192982456140351	0.7304782082324455	0.7288135593220338	0.7321428571428571	0.7303532259284471	6.4413511753082275	9.0	0.7652173913043478	0.7222222222222222	0.8372093023255814	0.7621065375302664	0.8813559322033898	0.6428571428571429	0.7605829285218598	12.01004934310913	9.0	0.7217391304347827	0.7368421052631579	0.7068965517241379	0.722003631961259	0.711864406779661	0.7321428571428571	0.7217180883242589	10.734184980392456	9.0	0.7217391304347827	0.7014925373134329	0.75	0.7197336561743342	0.7966101694915254	0.6428571428571429	0.7191697191697193	16.184799194335938	9.0	0.7565217391304347	0.7818181818181819	0.7333333333333333
89	9.0	0.7478260869565218	0.8235294117647058	0.6875	0.7538040170419964	0.6774193548387096	0.8301886792452831	0.7477497919975795	1.5568437576293945	9.0	0.782608695652174	0.8363636363636363	0.7333333333333333	0.7860620815581254	0.7419354838709677	0.8301886792452831	0.7825429241358445	6.436378479003906	9.0	0.7913043478260869	0.7794117647058824	0.8085106382978723	0.7859099208764455	0.8548387096774194	0.7169811320754716	0.7876923076923077	10.133403778076172	9.0	0.6695652173913044	0.7142857142857143	0.6271186440677966	0.6716372489348752	0.6451612903225806	0.6981132075471698	0.6693401937046004	11.475521802902222	9.0	0.7130434782608696	0.7377049180327869	0.6851851851851852	0.7119598295800365	0.7258064516129032	0.6981132075471698	0.7116480510599499	16.679088592529297	9.0	0.7478260869565218	0.7704918032786885	0.7222222222222222
90	10.0	0.7672413793103449	0.7288135593220338	0.8070175438596491	0.769115890083632	0.7962962962962963	0.7419354838709677	0.7670855953000669	1.6555564403533936	10.0	0.7586206896551724	0.7241379310344828	0.7931034482758621	0.7598566308243728	0.7777777777777778	0.7419354838709677	0.7583333333333333	6.937038421630859	10.0	0.75	0.6811594202898551	0.851063829787234	0.7577658303464755	0.8703703703703703	0.6451612903225806	0.7490862982024316	10.994080781936646	10.0	0.7844827586206896	0.7959183673469388	0.7761194029850746	0.7804659498207885	0.7222222222222222	0.8387096774193549	0.7817415518928275	13.371376037597656	10.0	0.7672413793103449	0.7213114754098361	0.8181818181818182	0.770310633213859	0.8148148148148148	0.7258064516129032	0.7672240802675585	16.85438299179077	10.0	0.7241379310344828	0.6666666666666666	0.8
91	10.0	0.7391304347826086	0.6896551724137931	0.7894736842105263	0.7417582417582418	0.7692307692307693	0.7142857142857143	0.7386363636363638	1.6381690502166748	10.0	0.8173913043478261	0.7719298245614035	0.8620689655172413	0.8199023199023199	0.8461538461538461	0.7936507936507936	0.81689286526651	6.80419659614563	10.0	0.7391304347826086	0.6571428571428571	0.8666666666666667	0.7518315018315018	0.8846153846153846	0.6190476190476191	0.73816029143898	10.892911672592163	10.0	0.782608695652174	0.7647058823529411	0.796875	0.7797619047619048	0.75	0.8095238095238095	0.7802155798486354	12.61696743965149	10.0	0.7652173913043478	0.711864406779661	0.8214285714285714	0.7689255189255189	0.8076923076923077	0.7301587301587301	0.764933000227118	16.660616874694824	10.0	0.6608695652173913	0.6181818181818182	0.7
92	10.0	0.8434782608695652	0.8297872340425532	0.8529411764705882	0.8373531230674087	0.7959183673469388	0.8787878787878788	0.8390858208955223	1.5838181972503662	10.0	0.7652173913043478	0.6833333333333333	0.8545454545454545	0.7744279529993816	0.8367346938775511	0.7121212121212122	0.7645765410569414	6.752363443374634	10.0	0.808695652173913	0.7142857142857143	0.9230769230769231	0.8228200371057515	0.9183673469387755	0.7272727272727273	0.8085653753026635	11.004276990890503	10.0	0.8	0.7954545454545454	0.8028169014084507	0.788961038961039	0.7142857142857143	0.8636363636363636	0.7924024801820893	12.821275472640991	10.0	0.8	0.7708333333333334	0.8208955223880597	0.7942176870748299	0.7551020408163265	0.8333333333333334	0.7949771335555385	16.083003759384155	10.0	0.7217391304347827	0.6545454545454545	0.7833333333333333
93	10.0	0.7913043478260869	0.8936170212765957	0.7205882352941176	0.7979659987856709	0.6885245901639344	0.9074074074074074	0.7905282331511838	1.4645600318908691	10.0	0.808695652173913	0.8421052631578947	0.7758620689655172	0.8101092896174864	0.7868852459016393	0.8333333333333334	0.8085653753026634	7.258062362670898	10.0	0.7565217391304347	0.7704918032786885	0.7407407407407407	0.7556162720097146	0.7704918032786885	0.7407407407407407	0.7556162720097146	9.811272621154785	10.0	0.7565217391304347	0.8113207547169812	0.7096774193548387	0.75986642380085	0.7049180327868853	0.8148148148148148	0.7565033272837265	12.222278833389282	10.0	0.7478260869565218	0.82	0.6923076923076923	0.7527322404371585	0.6721311475409836	0.8333333333333334	0.747520629873571	15.671232223510742	10.0	0.8	0.7878787878787878	0.8163265306122449
94	10.0	0.782608695652174	0.8113207547169812	0.7580645161290323	0.7829703569267998	0.7413793103448276	0.8245614035087719	0.7823453705806647	1.6175620555877686	10.0	0.782608695652174	0.8113207547169812	0.7580645161290323	0.7829703569267998	0.7413793103448276	0.8245614035087719	0.7823453705806647	7.169952392578125	10.0	0.7217391304347827	0.7407407407407407	0.7049180327868853	0.722020568663037	0.6896551724137931	0.7543859649122807	0.7215496368038741	9.920722723007202	10.0	0.7739130434782608	0.8333333333333334	0.7313432835820896	0.7746521476104054	0.6896551724137931	0.8596491228070176	0.7725197808886184	11.725695610046387	10.0	0.7565217391304347	0.7419354838709677	0.7735849056603774	0.7562008469449486	0.7931034482758621	0.7192982456140351	0.7560606060606061	15.247076272964478	10.0	0.7391304347826086	0.71875	0.7647058823529411
95	10.0	0.7304347826086957	0.7419354838709677	0.7169811320754716	0.7289010321797207	0.7540983606557377	0.7037037037037037	0.7291239267532863	1.5327835083007812	10.0	0.7913043478260869	0.7936507936507936	0.7884615384615384	0.7894656952034002	0.819672131147541	0.7592592592592593	0.7900182592818016	6.711553573608398	10.0	0.7304347826086957	0.7272727272727273	0.7346938775510204	0.7267759562841529	0.7868852459016393	0.6666666666666666	0.727467319012308	10.523685693740845	10.0	0.8173913043478261	0.8571428571428571	0.7796610169491526	0.8193685488767456	0.7868852459016393	0.8518518518518519	0.8173360562741094	11.2839195728302	10.0	0.7913043478260869	0.8363636363636363	0.75	0.7937158469945356	0.7540983606557377	0.8333333333333334	0.7912885662431941	16.22457265853882	10.0	0.6608695652173913	0.6833333333333333	0.6363636363636364
96	10.0	0.7652173913043478	0.765625	0.7647058823529411	0.7627504553734061	0.8032786885245902	0.7222222222222222	0.7634285714285713	1.8615434169769287	10.0	0.8347826086956521	0.9038461538461539	0.7777777777777778	0.838949605343048	0.7704918032786885	0.9074074074074074	0.8347326223432419	6.784055233001709	10.0	0.6869565217391305	0.6923076923076923	0.68	0.6836672738312083	0.7377049180327869	0.6296296296296297	0.6840659340659341	10.347697734832764	10.0	0.7391304347826086	0.7540983606557377	0.7222222222222222	0.73816029143898	0.7540983606557377	0.7222222222222222	0.73816029143898	12.165574312210083	10.0	0.782608695652174	0.7903225806451613	0.7735849056603774	0.7812689738919247	0.8032786885245902	0.7592592592592593	0.7815515538332953	16.175225973129272	10.0	0.7130434782608696	0.7121212121212122	0.7142857142857143
97	10.0	0.7565217391304347	0.7272727272727273	0.7833333333333333	0.7563907486305539	0.7547169811320755	0.7580645161290323	0.7556162720097146	1.6567699909210205	10.0	0.6956521739130435	0.65	0.7454545454545455	0.6985696895922093	0.7358490566037735	0.6612903225806451	0.6955600937901824	6.816731929779053	10.0	0.7739130434782608	0.6956521739130435	0.8913043478260869	0.7834753499695679	0.9056603773584906	0.6612903225806451	0.7730722525804493	10.620563745498657	10.0	0.7391304347826086	0.7090909090909091	0.7666666666666667	0.7388922702373706	0.7358490566037735	0.7419354838709677	0.7381602914389799	12.67344331741333	10.0	0.7304347826086957	0.6833333333333333	0.7818181818181819	0.7335666463785758	0.7735849056603774	0.6935483870967742	0.7303532259284472	16.02119517326355	10.0	0.6782608695652174	0.66	0.6923076923076923
98	10.0	0.7043478260869566	0.7049180327868853	0.7037037037037037	0.7036924939467313	0.7288135593220338	0.6785714285714286	0.7037878787878787	1.4905660152435303	10.0	0.7652173913043478	0.7758620689655172	0.7543859649122807	0.7652845036319613	0.7627118644067796	0.7678571428571429	0.7651463580667122	6.384762525558472	10.0	0.7739130434782608	0.726027397260274	0.8571428571428571	0.7705811138014529	0.8983050847457628	0.6428571428571429	0.7688620902906618	9.185733318328857	10.0	0.6956521739130435	0.7068965517241379	0.6842105263157895	0.6956719128329298	0.6949152542372882	0.6964285714285714	0.6955600937901822	11.53145432472229	10.0	0.7043478260869566	0.6865671641791045	0.7291666666666666	0.7023305084745763	0.7796610169491526	0.625	0.7016178266178266	16.36529278755188	10.0	0.7391304347826086	0.7457627118644068	0.7321428571428571
99	10.0	0.7391304347826086	0.82	0.676923076923077	0.7457395009129641	0.6612903225806451	0.8301886792452831	0.738952784503632	1.5633437633514404	10.0	0.7739130434782608	0.8214285714285714	0.7288135593220338	0.7766281192939745	0.7419354838709677	0.8113207547169812	0.7737590799031477	6.609203577041626	10.0	0.8	0.782608695652174	0.8260869565217391	0.7939744370054778	0.8709677419354839	0.7169811320754716	0.7960521242963992	10.20967149734497	10.0	0.6869565217391305	0.7241379310344828	0.6491228070175439	0.6877662811929397	0.6774193548387096	0.6981132075471698	0.6863636363636364	11.389214038848877	10.0	0.7217391304347827	0.75	0.6909090909090909	0.7213937918441875	0.7258064516129032	0.7169811320754716	0.7207043108682454	16.298920154571533	10.0	0.7478260869565218	0.7894736842105263	0.7068965517241379
100	11.0	0.7327586206896551	0.6949152542372882	0.7719298245614035	0.734468339307049	0.7592592592592593	0.7096774193548387	0.7325797575667434	1.673647165298462	11.0	0.7758620689655172	0.7413793103448276	0.8103448275862069	0.7771804062126643	0.7962962962962963	0.7580645161290323	0.7755952380952381	6.361026287078857	11.0	0.7672413793103449	0.7076923076923077	0.8431372549019608	0.772700119474313	0.8518518518518519	0.6935483870967742	0.767085595300067	10.479111671447754	11.0	0.8362068965517241	0.8181818181818182	0.8524590163934426	0.8360215053763441	0.8333333333333334	0.8387096774193549	0.8356082643395242	12.651675939559937	11.0	0.7758620689655172	0.7413793103448276	0.8103448275862069	0.7771804062126643	0.7962962962962963	0.7580645161290323	0.7755952380952381	16.830926418304443	11.0	0.7413793103448276	0.6875	0.8076923076923077
101	11.0	0.7739130434782608	0.7321428571428571	0.8135593220338984	0.7751831501831501	0.7884615384615384	0.7619047619047619	0.7730722525804492	1.6302239894866943	11.0	0.8	0.7543859649122807	0.8448275862068966	0.8023504273504274	0.8269230769230769	0.7777777777777778	0.7994540905299872	6.371316909790039	11.0	0.7391304347826086	0.6571428571428571	0.8666666666666667	0.7518315018315018	0.8846153846153846	0.6190476190476191	0.73816029143898	11.065094470977783	11.0	0.782608695652174	0.7547169811320755	0.8064516129032258	0.7814407814407814	0.7692307692307693	0.7936507936507936	0.7809523809523808	12.738077163696289	11.0	0.7652173913043478	0.711864406779661	0.8214285714285714	0.7689255189255189	0.8076923076923077	0.7301587301587301	0.764933000227118	16.70010209083557	11.0	0.6695652173913044	0.6346153846153846	0.6984126984126984
102	11.0	0.7739130434782608	0.7169811320754716	0.8225806451612904	0.7741187384044527	0.7755102040816326	0.7727272727272727	0.7709865196078431	1.588399887084961	11.0	0.7913043478260869	0.7192982456140351	0.8620689655172413	0.7971552257266543	0.8367346938775511	0.7575757575757576	0.7900182592818015	5.677285671234131	11.0	0.808695652173913	0.7142857142857143	0.9230769230769231	0.8228200371057515	0.9183673469387755	0.7272727272727273	0.8085653753026635	11.541348695755005	11.0	0.8	0.8095238095238095	0.7945205479452054	0.7863327149041435	0.6938775510204082	0.8787878787878788	0.7908925606767332	12.760464429855347	11.0	0.7565217391304347	0.7142857142857143	0.7878787878787878	0.751082251082251	0.7142857142857143	0.7878787878787878	0.751082251082251	17.166995763778687	11.0	0.7565217391304347	0.6842105263157895	0.8275862068965517
103	11.0	0.808695652173913	0.8823529411764706	0.75	0.8132969034608379	0.7377049180327869	0.8888888888888888	0.8085653753026634	1.458456039428711	11.0	0.7652173913043478	0.8035714285714286	0.7288135593220338	0.7670006071645417	0.7377049180327869	0.7962962962962963	0.7651463580667122	5.863295793533325	11.0	0.7391304347826086	0.7246376811594203	0.7608695652173914	0.7339101396478446	0.819672131147541	0.6481481481481481	0.7346153846153847	10.015327453613281	11.0	0.7391304347826086	0.7719298245614035	0.7068965517241379	0.7402853673345478	0.7213114754098361	0.7592592592592593	0.7389527845036319	12.169960498809814	11.0	0.7739130434782608	0.8301886792452831	0.7258064516129032	0.7773224043715847	0.7213114754098361	0.8333333333333334	0.7738959467634603	16.01560640335083	11.0	0.7652173913043478	0.7575757575757576	0.7755102040816326
104	11.0	0.782608695652174	0.8113207547169812	0.7580645161290323	0.7829703569267998	0.7413793103448276	0.8245614035087719	0.7823453705806647	1.5591464042663574	11.0	0.7565217391304347	0.8	0.7230769230769231	0.7571082879612825	0.6896551724137931	0.8245614035087719	0.7556162720097146	5.528289794921875	11.0	0.6956521739130435	0.7017543859649122	0.6896551724137931	0.6957047791893527	0.6896551724137931	0.7017543859649122	0.6956521739130435	9.672643661499023	11.0	0.7304347826086957	0.7755102040816326	0.696969696969697	0.7310949788263763	0.6551724137931034	0.8070175438596491	0.7291239267532862	11.522921323776245	11.0	0.6956521739130435	0.6949152542372882	0.6964285714285714	0.6955535390199636	0.7068965517241379	0.6842105263157895	0.6955600937901822	16.24960494041443	11.0	0.7217391304347827	0.7166666666666667	0.7272727272727273
105	11.0	0.7739130434782608	0.8070175438596491	0.7413793103448276	0.775197328476017	0.7540983606557377	0.7962962962962963	0.7737590799031477	1.5234904289245605	11.0	0.7652173913043478	0.7575757575757576	0.7755102040816326	0.7616879174256224	0.819672131147541	0.7037037037037037	0.7626328262365263	5.333019971847534	11.0	0.7478260869565218	0.7352941176470589	0.7659574468085106	0.7431693989071038	0.819672131147541	0.6666666666666666	0.7440325427891625	12.281455993652344	11.0	0.7739130434782608	0.8070175438596491	0.7413793103448276	0.775197328476017	0.7540983606557377	0.7962962962962963	0.7737590799031477	11.281615734100342	11.0	0.7565217391304347	0.7704918032786885	0.7407407407407407	0.7556162720097146	0.7704918032786885	0.7407407407407407	0.7556162720097146	15.78718376159668	11.0	0.6869565217391305	0.711864406779661	0.6607142857142857
106	11.0	0.7652173913043478	0.7575757575757576	0.7755102040816326	0.7616879174256224	0.819672131147541	0.7037037037037037	0.7626328262365263	1.9020094871520996	11.0	0.7913043478260869	0.8490566037735849	0.7419354838709677	0.7947783849423193	0.7377049180327869	0.8518518518518519	0.7912885662431942	5.916484832763672	11.0	0.6956521739130435	0.696969696969697	0.6938775510204082	0.6918639951426837	0.7540983606557377	0.6296296296296297	0.6923018117880896	10.604922533035278	11.0	0.7652173913043478	0.7931034482758621	0.7368421052631579	0.7659380692167577	0.7540983606557377	0.7777777777777778	0.7649330002271177	12.539821147918701	11.0	0.7739130434782608	0.7868852459016393	0.7592592592592593	0.7730722525804493	0.7868852459016393	0.7592592592592593	0.7730722525804492	16.951679944992065	11.0	0.7478260869565218	0.7352941176470589	0.7659574468085106
107	11.0	0.7739130434782608	0.7368421052631579	0.8103448275862069	0.7752586731588558	0.7924528301886793	0.7580645161290323	0.7734848484848484	1.6549015045166016	11.0	0.7043478260869566	0.6666666666666666	0.7413793103448276	0.705264759586123	0.7169811320754716	0.6935483870967742	0.7037878787878789	6.127202749252319	11.0	0.7478260869565218	0.6666666666666666	0.8837209302325582	0.7592818015824712	0.9056603773584906	0.6129032258064516	0.7459047619047618	10.467154264450073	11.0	0.7130434782608696	0.6724137931034483	0.7543859649122807	0.7146987218502738	0.7358490566037735	0.6935483870967742	0.7126958891664774	12.510628938674927	11.0	0.7565217391304347	0.711864406779661	0.8035714285714286	0.7591296409007913	0.7924528301886793	0.7258064516129032	0.7563559322033899	16.947434425354004	11.0	0.6956521739130435	0.6666666666666666	0.7213114754098361
108	11.0	0.7391304347826086	0.7377049180327869	0.7407407407407407	0.7384987893462469	0.7627118644067796	0.7142857142857143	0.7386363636363638	1.5145220756530762	11.0	0.7652173913043478	0.7758620689655172	0.7543859649122807	0.7652845036319613	0.7627118644067796	0.7678571428571429	0.7651463580667122	6.467613935470581	11.0	0.7739130434782608	0.7323943661971831	0.8409090909090909	0.7710351089588378	0.8813559322033898	0.6607142857142857	0.77	11.033909559249878	11.0	0.7043478260869566	0.7049180327868853	0.7037037037037037	0.7036924939467313	0.7288135593220338	0.6785714285714286	0.7037878787878787	12.068212747573853	11.0	0.7130434782608696	0.696969696969697	0.7346938775510204	0.7112590799031477	0.7796610169491526	0.6428571428571429	0.7108571428571429	17.620131254196167	11.0	0.7478260869565218	0.7777777777777778	0.7213114754098361
109	11.0	0.7304347826086957	0.8163265306122449	0.6666666666666666	0.7376749847839319	0.6451612903225806	0.8301886792452831	0.7301082595200242	1.3452167510986328	11.0	0.7739130434782608	0.8333333333333334	0.7213114754098361	0.7779975654290932	0.7258064516129032	0.8301886792452831	0.7738959467634603	6.016305685043335	11.0	0.808695652173913	0.7857142857142857	0.8444444444444444	0.80203895313451	0.8870967741935484	0.7169811320754716	0.8044217687074829	10.61147689819336	11.0	0.6869565217391305	0.7166666666666667	0.6545454545454545	0.6863968350578211	0.6935483870967742	0.6792452830188679	0.6857923497267759	11.780030965805054	11.0	0.7043478260869566	0.7258064516129032	0.6792452830188679	0.7025258673158856	0.7258064516129032	0.6792452830188679	0.7025258673158856	17.108343839645386	11.0	0.6869565217391305	0.7096774193548387	0.660377358490566
110	12.0	0.75	0.711864406779661	0.7894736842105263	0.7517921146953406	0.7777777777777778	0.7258064516129032	0.7498326764334052	1.6763226985931396	12.0	0.7586206896551724	0.7166666666666667	0.8035714285714286	0.7610513739545998	0.7962962962962963	0.7258064516129032	0.7585489146595301	6.366246700286865	12.0	0.7586206896551724	0.6857142857142857	0.8695652173913043	0.7670250896057347	0.8888888888888888	0.6451612903225806	0.7574671445639187	10.883384227752686	12.0	0.7844827586206896	0.8085106382978723	0.7681159420289855	0.7792712066905616	0.7037037037037037	0.8548387096774194	0.780817776434132	13.321967601776123	12.0	0.7586206896551724	0.7166666666666667	0.8035714285714286	0.7610513739545998	0.7962962962962963	0.7258064516129032	0.7585489146595301	16.622738122940063	12.0	0.75	0.6984126984126984	0.8113207547169812
111	12.0	0.7913043478260869	0.75	0.8305084745762712	0.7927350427350428	0.8076923076923077	0.7777777777777778	0.790528233151184	1.6185836791992188	12.0	0.808695652173913	0.7419354838709677	0.8867924528301887	0.8153235653235653	0.8846153846153846	0.746031746031746	0.808681185722928	6.895727634429932	12.0	0.7391304347826086	0.6571428571428571	0.8666666666666667	0.7518315018315018	0.8846153846153846	0.6190476190476191	0.73816029143898	11.098603248596191	12.0	0.808695652173913	0.7884615384615384	0.8253968253968254	0.806929181929182	0.7884615384615384	0.8253968253968254	0.806929181929182	12.232226133346558	12.0	0.7652173913043478	0.7272727272727273	0.8	0.7655677655677655	0.7692307692307693	0.7619047619047619	0.7640756781399589	17.51383328437805	12.0	0.6347826086956522	0.5925925925925926	0.6721311475409836
112	12.0	0.7913043478260869	0.7659574468085106	0.8088235294117647	0.7840136054421769	0.7346938775510204	0.8333333333333334	0.7854477611940298	1.6383295059204102	12.0	0.8	0.7321428571428571	0.864406779661017	0.8047309833024119	0.8367346938775511	0.7727272727272727	0.7984761904761905	6.554210424423218	12.0	0.8173913043478261	0.71875	0.9411764705882353	0.8330241187384044	0.9387755102040817	0.7272727272727273	0.8173360562741093	11.35042428970337	12.0	0.8	0.8095238095238095	0.7945205479452054	0.7863327149041435	0.6938775510204082	0.8787878787878788	0.7908925606767332	12.87656855583191	12.0	0.8	0.7708333333333334	0.8208955223880597	0.7942176870748299	0.7551020408163265	0.8333333333333334	0.7949771335555385	16.747246503829956	12.0	0.7304347826086957	0.6607142857142857	0.7966101694915254
113	12.0	0.808695652173913	0.8679245283018868	0.7580645161290323	0.812234365513054	0.7540983606557377	0.8703703703703703	0.8086811857229279	1.497666358947754	12.0	0.7739130434782608	0.8181818181818182	0.7333333333333333	0.7762598664238008	0.7377049180327869	0.8148148148148148	0.7738959467634603	6.5030882358551025	12.0	0.7304347826086957	0.7272727272727273	0.7346938775510204	0.7267759562841529	0.7868852459016393	0.6666666666666666	0.727467319012308	9.906882524490356	12.0	0.7478260869565218	0.7758620689655172	0.7192982456140351	0.7484820886460231	0.7377049180327869	0.7592592592592593	0.747520629873571	11.928253650665283	12.0	0.7913043478260869	0.8363636363636363	0.75	0.7937158469945356	0.7540983606557377	0.8333333333333334	0.7912885662431941	16.802603483200073	12.0	0.7739130434782608	0.7611940298507462	0.7916666666666666
114	12.0	0.7913043478260869	0.8148148148148148	0.7704918032786885	0.7915910465819722	0.7586206896551724	0.8245614035087719	0.7911622276029056	1.5804307460784912	12.0	0.7652173913043478	0.8163265306122449	0.7272727272727273	0.7658802177858439	0.6896551724137931	0.8421052631578947	0.764075678139959	5.754822015762329	12.0	0.7130434782608696	0.7049180327868853	0.7222222222222222	0.7127949183303086	0.7413793103448276	0.6842105263157895	0.7126958891664774	10.28291368484497	12.0	0.7043478260869566	0.75	0.6716417910447762	0.7050816696914701	0.6206896551724138	0.7894736842105263	0.7025258673158856	11.883710384368896	12.0	0.7565217391304347	0.7586206896551724	0.7543859649122807	0.7565033272837265	0.7586206896551724	0.7543859649122807	0.7565033272837265	16.92597532272339	12.0	0.7391304347826086	0.71875	0.7647058823529411
115	12.0	0.8	0.796875	0.803921568627451	0.7976624165148756	0.8360655737704918	0.7592592592592593	0.7984761904761905	1.5195086002349854	12.0	0.7478260869565218	0.7580645161290323	0.7358490566037735	0.7463570127504553	0.7704918032786885	0.7222222222222222	0.7465998024466226	6.268591642379761	12.0	0.7565217391304347	0.746268656716418	0.7708333333333334	0.7524286581663631	0.819672131147541	0.6851851851851852	0.7533700980392157	10.28665280342102	12.0	0.7478260869565218	0.7758620689655172	0.7192982456140351	0.7484820886460231	0.7377049180327869	0.7592592592592593	0.747520629873571	11.894758939743042	12.0	0.7565217391304347	0.7704918032786885	0.7407407407407407	0.7556162720097146	0.7704918032786885	0.7407407407407407	0.7556162720097146	17.200925827026367	12.0	0.6608695652173913	0.6833333333333333	0.6363636363636364
116	12.0	0.7652173913043478	0.7741935483870968	0.7547169811320755	0.76381299332119	0.7868852459016393	0.7407407407407407	0.764075678139959	1.873082160949707	12.0	0.8	0.8518518518518519	0.7540983606557377	0.8029751062537948	0.7540983606557377	0.8518518518518519	0.7999999999999999	6.848052978515625	12.0	0.6956521739130435	0.703125	0.6862745098039216	0.6929265330904675	0.7377049180327869	0.6481481481481481	0.6933333333333334	9.925044536590576	12.0	0.7739130434782608	0.7868852459016393	0.7592592592592593	0.7730722525804493	0.7868852459016393	0.7592592592592593	0.7730722525804492	13.123019695281982	12.0	0.782608695652174	0.8	0.7636363636363637	0.7823315118397085	0.7868852459016393	0.7777777777777778	0.7820153157934643	17.891766786575317	12.0	0.7043478260869566	0.7142857142857143	0.6923076923076923
117	12.0	0.7391304347826086	0.7169811320754716	0.7580645161290323	0.737522824102252	0.7169811320754716	0.7580645161290323	0.737522824102252	1.6477031707763672	12.0	0.6869565217391305	0.6440677966101694	0.7321428571428571	0.6891357273280584	0.7169811320754716	0.6612903225806451	0.6867433414043582	6.593710899353027	12.0	0.7565217391304347	0.6811594202898551	0.8695652173913043	0.7659768715763846	0.8867924528301887	0.6451612903225806	0.7556162720097146	10.675429582595825	12.0	0.6782608695652174	0.6379310344827587	0.7192982456140351	0.6797017650639074	0.6981132075471698	0.6612903225806451	0.6778711484593838	13.053711652755737	12.0	0.7565217391304347	0.7358490566037735	0.7741935483870968	0.7550213024954351	0.7358490566037735	0.7741935483870968	0.7550213024954351	17.852588653564453	12.0	0.6869565217391305	0.6491228070175439	0.7241379310344828
118	12.0	0.7565217391304347	0.7719298245614035	0.7413793103448276	0.7568099273607749	0.7457627118644068	0.7678571428571429	0.7565033272837265	1.5101885795593262	12.0	0.7565217391304347	0.7627118644067796	0.75	0.7563559322033898	0.7627118644067796	0.75	0.7563559322033898	6.062047481536865	12.0	0.7739130434782608	0.726027397260274	0.8571428571428571	0.7705811138014529	0.8983050847457628	0.6428571428571429	0.7688620902906618	10.398464679718018	12.0	0.7130434782608696	0.7241379310344828	0.7017543859649122	0.7130750605326877	0.711864406779661	0.7142857142857143	0.7129566598593147	11.332270622253418	12.0	0.7043478260869566	0.6865671641791045	0.7291666666666666	0.7023305084745763	0.7796610169491526	0.625	0.7016178266178266	16.33941888809204	12.0	0.7130434782608696	0.7166666666666667	0.7090909090909091
119	12.0	0.7043478260869566	0.7916666666666666	0.6417910447761194	0.7121119902617163	0.6129032258064516	0.8113207547169812	0.7037878787878789	1.647346019744873	12.0	0.7913043478260869	0.8392857142857143	0.7457627118644068	0.7941265976871577	0.7580645161290323	0.8301886792452831	0.7911622276029057	6.613041877746582	12.0	0.7913043478260869	0.7794117647058824	0.8085106382978723	0.7859099208764455	0.8548387096774194	0.7169811320754716	0.7876923076923077	10.167291164398193	12.0	0.6434782608695652	0.6721311475409836	0.6111111111111112	0.6419659160073037	0.6612903225806451	0.6226415094339622	0.6417445482866043	11.550333499908447	12.0	0.7043478260869566	0.71875	0.6862745098039216	0.7011564211807668	0.7419354838709677	0.660377358490566	0.7016178266178267	15.836146354675293	12.0	0.7130434782608696	0.7543859649122807	0.6724137931034483
120	13.0	0.7586206896551724	0.7166666666666667	0.8035714285714286	0.7610513739545998	0.7962962962962963	0.7258064516129032	0.7585489146595301	1.6612541675567627	13.0	0.8017241379310345	0.7719298245614035	0.8305084745762712	0.802568697729988	0.8148148148148148	0.7903225806451613	0.8013550740823467	7.283198356628418	13.0	0.7413793103448276	0.6818181818181818	0.82	0.7473118279569892	0.8333333333333334	0.6612903225806451	0.7410714285714286	10.660554885864258	13.0	0.8103448275862069	0.7962962962962963	0.8225806451612904	0.8094384707287934	0.7962962962962963	0.8225806451612904	0.8094384707287934	12.855196714401245	13.0	0.7672413793103449	0.7213114754098361	0.8181818181818182	0.770310633213859	0.8148148148148148	0.7258064516129032	0.7672240802675585	16.45185160636902	13.0	0.7155172413793104	0.6615384615384615	0.7843137254901961
121	13.0	0.7478260869565218	0.7090909090909091	0.7833333333333333	0.748015873015873	0.75	0.746031746031746	0.7465998024466227	1.6484014987945557	13.0	0.8	0.7377049180327869	0.8703703703703703	0.8057081807081807	0.8653846153846154	0.746031746031746	0.799939490204977	7.297146558761597	13.0	0.7565217391304347	0.6714285714285714	0.8888888888888888	0.7693833943833943	0.9038461538461539	0.6349206349206349	0.7556162720097146	10.371240854263306	13.0	0.7478260869565218	0.7017543859649122	0.7931034482758621	0.7496947496947497	0.7692307692307693	0.7301587301587301	0.7471377663204186	12.161145687103271	13.0	0.7391304347826086	0.6774193548387096	0.8113207547169812	0.7451159951159951	0.8076923076923077	0.6825396825396826	0.7391107078039927	17.326621532440186	13.0	0.6956521739130435	0.6666666666666666	0.71875
122	13.0	0.8173913043478261	0.78	0.8461538461538461	0.814625850340136	0.7959183673469388	0.8333333333333334	0.8137867221836688	1.5685498714447021	13.0	0.782608695652174	0.7068965517241379	0.8596491228070176	0.7895794681508967	0.8367346938775511	0.7424242424242424	0.7815515538332953	6.721926927566528	13.0	0.7913043478260869	0.6811594202898551	0.9565217391304348	0.8129251700680271	0.9591836734693877	0.6666666666666666	0.7911622276029056	10.786925315856934	13.0	0.8173913043478261	0.85	0.8	0.8014842300556586	0.6938775510204082	0.9090909090909091	0.8075543868037294	13.15347933769226	13.0	0.7739130434782608	0.7346938775510204	0.803030303030303	0.7688620902906618	0.7346938775510204	0.803030303030303	0.7688620902906617	18.024085760116577	13.0	0.7652173913043478	0.6964285714285714	0.8305084745762712
123	13.0	0.8	0.88	0.7384615384615385	0.8051001821493624	0.7213114754098361	0.8888888888888888	0.7997577409342116	1.4744830131530762	13.0	0.7739130434782608	0.8070175438596491	0.7413793103448276	0.775197328476017	0.7540983606557377	0.7962962962962963	0.7737590799031477	6.44638466835022	13.0	0.7652173913043478	0.7741935483870968	0.7547169811320755	0.76381299332119	0.7868852459016393	0.7407407407407407	0.764075678139959	9.24460768699646	13.0	0.7478260869565218	0.8076923076923077	0.6984126984126984	0.7516697024893746	0.6885245901639344	0.8148148148148148	0.7477497919975795	12.222844123840332	13.0	0.7913043478260869	0.8363636363636363	0.75	0.7937158469945356	0.7540983606557377	0.8333333333333334	0.7912885662431941	17.106773614883423	13.0	0.7913043478260869	0.7846153846153846	0.8
124	13.0	0.8347826086956521	0.8679245283018868	0.8064516129032258	0.8351482153660013	0.7931034482758621	0.8771929824561403	0.8345824816413052	1.5816407203674316	13.0	0.7391304347826086	0.8043478260869565	0.6956521739130435	0.7400181488203267	0.6379310344827587	0.8421052631578947	0.7367216117216118	6.708112478256226	13.0	0.7043478260869566	0.75	0.6716417910447762	0.7050816696914701	0.6206896551724138	0.7894736842105263	0.7025258673158856	8.920613050460815	13.0	0.7565217391304347	0.8409090909090909	0.704225352112676	0.7575620084694494	0.6379310344827587	0.8771929824561403	0.7533700980392155	11.463048458099365	13.0	0.7217391304347827	0.7166666666666667	0.7272727272727273	0.7215668481548699	0.7413793103448276	0.7017543859649122	0.7215496368038741	16.71115493774414	13.0	0.7565217391304347	0.7419354838709677	0.7735849056603774
125	13.0	0.7565217391304347	0.7894736842105263	0.7241379310344828	0.7577413479052824	0.7377049180327869	0.7777777777777778	0.7563559322033899	1.5200684070587158	13.0	0.7304347826086957	0.7142857142857143	0.7555555555555555	0.7246508803885854	0.819672131147541	0.6296296296296297	0.7251137327473205	6.208933115005493	13.0	0.7391304347826086	0.7384615384615385	0.74	0.7360352155434122	0.7868852459016393	0.6851851851851852	0.7367216117216117	10.367374181747437	13.0	0.8173913043478261	0.8333333333333334	0.8	0.8172434729811779	0.819672131147541	0.8148148148148148	0.8168928652665101	10.426141023635864	13.0	0.7478260869565218	0.7758620689655172	0.7192982456140351	0.7484820886460231	0.7377049180327869	0.7592592592592593	0.747520629873571	16.354798555374146	13.0	0.6869565217391305	0.7049180327868853	0.6666666666666666
126	13.0	0.7565217391304347	0.7619047619047619	0.75	0.7545537340619308	0.7868852459016393	0.7222222222222222	0.7550213024954351	1.9124326705932617	13.0	0.808695652173913	0.8545454545454545	0.7666666666666667	0.8111718275652702	0.7704918032786885	0.8518518518518519	0.808681185722928	6.905324935913086	13.0	0.6608695652173913	0.6666666666666666	0.6530612244897959	0.6569520340012143	0.7213114754098361	0.5925925925925926	0.6571363045638713	9.8587646484375	13.0	0.7739130434782608	0.7966101694915254	0.75	0.7741347905282332	0.7704918032786885	0.7777777777777778	0.7734848484848486	11.186280012130737	13.0	0.7652173913043478	0.7833333333333333	0.7454545454545455	0.7648755312689739	0.7704918032786885	0.7592592592592593	0.7645765410569414	17.2126407623291	13.0	0.6956521739130435	0.696969696969697	0.6938775510204082
127	13.0	0.7565217391304347	0.7272727272727273	0.7833333333333333	0.7563907486305539	0.7547169811320755	0.7580645161290323	0.7556162720097146	1.6694221496582031	13.0	0.6782608695652174	0.6333333333333333	0.7272727272727273	0.6810712111990261	0.7169811320754716	0.6451612903225806	0.6781635277210498	6.53082275390625	13.0	0.7478260869565218	0.6714285714285714	0.8666666666666667	0.7579123554473524	0.8867924528301887	0.6290322580645161	0.7465998024466226	11.160207509994507	13.0	0.6956521739130435	0.6607142857142857	0.7288135593220338	0.695830797321972	0.6981132075471698	0.6935483870967742	0.69482144211085	11.477671384811401	13.0	0.7478260869565218	0.7142857142857143	0.7796610169491526	0.7483262325015216	0.7547169811320755	0.7419354838709677	0.7471377663204186	16.40580105781555	13.0	0.6782608695652174	0.6538461538461539	0.6984126984126984
128	13.0	0.7565217391304347	0.7627118644067796	0.75	0.7563559322033898	0.7627118644067796	0.75	0.7563559322033898	1.6680912971496582	13.0	0.7478260869565218	0.7678571428571429	0.7288135593220338	0.7483353510895884	0.7288135593220338	0.7678571428571429	0.7478260869565218	6.730930805206299	13.0	0.7913043478260869	0.7464788732394366	0.8636363636363636	0.7884382566585957	0.8983050847457628	0.6785714285714286	0.7876923076923077	10.46349835395813	13.0	0.7217391304347827	0.7368421052631579	0.7068965517241379	0.722003631961259	0.711864406779661	0.7321428571428571	0.7217180883242589	11.61471176147461	13.0	0.7043478260869566	0.7049180327868853	0.7037037037037037	0.7036924939467313	0.7288135593220338	0.6785714285714286	0.7037878787878787	15.170119285583496	13.0	0.7391304347826086	0.7735849056603774	0.7096774193548387
129	13.0	0.7391304347826086	0.8076923076923077	0.6825396825396826	0.7443700547778453	0.6774193548387096	0.8113207547169812	0.7391107078039927	1.5532591342926025	13.0	0.782608695652174	0.8363636363636363	0.7333333333333333	0.7860620815581254	0.7419354838709677	0.8301886792452831	0.7825429241358445	6.700883865356445	13.0	0.8173913043478261	0.8059701492537313	0.8333333333333334	0.8128423615337796	0.8709677419354839	0.7547169811320755	0.8146442551231867	10.971297025680542	13.0	0.7304347826086957	0.7719298245614035	0.6896551724137931	0.7321972002434571	0.7096774193548387	0.7547169811320755	0.7301082595200242	10.972586631774902	13.0	0.6869565217391305	0.7096774193548387	0.660377358490566	0.6850273889227023	0.7096774193548387	0.660377358490566	0.6850273889227024	16.710318326950073	13.0	0.7043478260869566	0.7333333333333333	0.6727272727272727
130	14.0	0.7672413793103449	0.7288135593220338	0.8070175438596491	0.769115890083632	0.7962962962962963	0.7419354838709677	0.7670855953000669	1.6933703422546387	14.0	0.7758620689655172	0.7413793103448276	0.8103448275862069	0.7771804062126643	0.7962962962962963	0.7580645161290323	0.7755952380952381	6.843897581100464	14.0	0.7844827586206896	0.7164179104477612	0.8775510204081632	0.7912186379928315	0.8888888888888888	0.6935483870967742	0.7840816022634203	10.232595443725586	14.0	0.75	0.7272727272727273	0.7704918032786885	0.7494026284348865	0.7407407407407407	0.7580645161290323	0.7490862982024316	12.540862083435059	14.0	0.7672413793103449	0.7368421052631579	0.7966101694915254	0.7679211469534051	0.7777777777777778	0.7580645161290323	0.766808130444494	16.368732690811157	14.0	0.7155172413793104	0.6721311475409836	0.7636363636363637
131	14.0	0.782608695652174	0.7368421052631579	0.8275862068965517	0.7847985347985348	0.8076923076923077	0.7619047619047619	0.7820153157934644	1.6718707084655762	14.0	0.7652173913043478	0.7192982456140351	0.8103448275862069	0.7672466422466422	0.7884615384615384	0.746031746031746	0.7645765410569414	6.905355215072632	14.0	0.7217391304347827	0.6388888888888888	0.8604651162790697	0.735958485958486	0.8846153846153846	0.5873015873015873	0.7200243457090687	10.999146699905396	14.0	0.782608695652174	0.7547169811320755	0.8064516129032258	0.7814407814407814	0.7692307692307693	0.7936507936507936	0.7809523809523808	13.339665651321411	14.0	0.7391304347826086	0.6833333333333333	0.8	0.7434371184371185	0.7884615384615384	0.6984126984126984	0.7389527845036319	16.84386682510376	14.0	0.6521739130434783	0.6071428571428571	0.6949152542372882
132	14.0	0.808695652173913	0.7755102040816326	0.8333333333333334	0.804421768707483	0.7755102040816326	0.8333333333333334	0.804421768707483	1.5784785747528076	14.0	0.782608695652174	0.7307692307692307	0.8253968253968254	0.7816944959802102	0.7755102040816326	0.7878787878787878	0.7793383989561746	6.951672554016113	14.0	0.7913043478260869	0.6923076923076923	0.92	0.8076685219542363	0.9183673469387755	0.696969696969697	0.7912885662431941	11.125781059265137	14.0	0.7652173913043478	0.75	0.7746478873239436	0.7534013605442177	0.673469387755102	0.8333333333333334	0.7562985636920179	14.104724884033203	14.0	0.7913043478260869	0.7358490566037735	0.8387096774193549	0.7918985776128633	0.7959183673469388	0.7878787878787878	0.7886029411764706	16.011889696121216	14.0	0.7565217391304347	0.6909090909090909	0.8166666666666667
133	14.0	0.7739130434782608	0.8431372549019608	0.71875	0.7783849423193685	0.7049180327868853	0.8518518518518519	0.7737590799031477	1.4845280647277832	14.0	0.7739130434782608	0.8070175438596491	0.7413793103448276	0.775197328476017	0.7540983606557377	0.7962962962962963	0.7737590799031477	6.901402950286865	14.0	0.7304347826086957	0.7205882352941176	0.7446808510638298	0.7257134183363692	0.8032786885245902	0.6481481481481481	0.7263796147056567	10.060055255889893	14.0	0.7217391304347827	0.7543859649122807	0.6896551724137931	0.7228293867638129	0.7049180327868853	0.7407407407407407	0.7215496368038741	11.945367097854614	14.0	0.7652173913043478	0.8035714285714286	0.7288135593220338	0.7670006071645417	0.7377049180327869	0.7962962962962963	0.7651463580667122	14.786608934402466	14.0	0.7652173913043478	0.7741935483870968	0.7547169811320755
134	14.0	0.808695652173913	0.8214285714285714	0.7966101694915254	0.808832425892317	0.7931034482758621	0.8245614035087719	0.808681185722928	1.5517644882202148	14.0	0.7565217391304347	0.8260869565217391	0.7101449275362319	0.7574107683000605	0.6551724137931034	0.8596491228070176	0.7542735042735043	6.360522985458374	14.0	0.7043478260869566	0.7	0.7090909090909091	0.7041742286751361	0.7241379310344828	0.6842105263157895	0.7041464891041163	9.816609144210815	14.0	0.7391304347826086	0.7692307692307693	0.7142857142857143	0.7395644283121597	0.6896551724137931	0.7894736842105263	0.7386363636363638	11.476198196411133	14.0	0.7217391304347827	0.7166666666666667	0.7272727272727273	0.7215668481548699	0.7413793103448276	0.7017543859649122	0.7215496368038741	16.86538529396057	14.0	0.7217391304347827	0.7166666666666667	0.7272727272727273
135	14.0	0.7913043478260869	0.7846153846153846	0.8	0.7884031572556163	0.8360655737704918	0.7407407407407407	0.7893772893772893	1.5018987655639648	14.0	0.7739130434782608	0.7868852459016393	0.7592592592592593	0.7730722525804493	0.7868852459016393	0.7592592592592593	0.7730722525804492	6.110056638717651	14.0	0.7478260869565218	0.7222222222222222	0.7906976744186046	0.7410443230115361	0.8524590163934426	0.6296296296296297	0.7414929075265484	10.769688129425049	14.0	0.782608695652174	0.8103448275862069	0.7543859649122807	0.7833940497874924	0.7704918032786885	0.7962962962962963	0.7823453705806647	11.358838081359863	14.0	0.7565217391304347	0.7704918032786885	0.7407407407407407	0.7556162720097146	0.7704918032786885	0.7407407407407407	0.7556162720097146	15.048206567764282	14.0	0.6695652173913044	0.6825396825396826	0.6538461538461539
136	14.0	0.7478260869565218	0.7666666666666667	0.7272727272727273	0.7474195506982392	0.7540983606557377	0.7407407407407407	0.7471377663204186	1.8489408493041992	14.0	0.782608695652174	0.8333333333333334	0.7377049180327869	0.7855191256830601	0.7377049180327869	0.8333333333333334	0.782608695652174	6.538094758987427	14.0	0.7130434782608696	0.71875	0.7058823529411765	0.7103825136612021	0.7540983606557377	0.6666666666666666	0.7108571428571429	10.370049476623535	14.0	0.7913043478260869	0.8245614035087719	0.7586206896551724	0.7926533090467516	0.7704918032786885	0.8148148148148148	0.7911622276029056	11.948827981948853	14.0	0.7652173913043478	0.7741935483870968	0.7547169811320755	0.76381299332119	0.7868852459016393	0.7407407407407407	0.764075678139959	16.099910259246826	14.0	0.7217391304347827	0.7377049180327869	0.7037037037037037
137	14.0	0.782608695652174	0.7592592592592593	0.8032786885245902	0.7819537431527693	0.7735849056603774	0.7903225806451613	0.7815515538332953	1.5512821674346924	14.0	0.7217391304347827	0.6842105263157895	0.7586206896551724	0.7227632379793061	0.7358490566037735	0.7096774193548387	0.7212121212121212	6.773989677429199	14.0	0.7391304347826086	0.6666666666666666	0.8478260869565217	0.7484783931832015	0.8679245283018868	0.6290322580645161	0.7381602914389799	10.391276359558105	14.0	0.7043478260869566	0.6610169491525424	0.75	0.7066342057212416	0.7358490566037735	0.6774193548387096	0.7041464891041163	12.378236770629883	14.0	0.7739130434782608	0.7454545454545455	0.8	0.7738892270237371	0.7735849056603774	0.7741935483870968	0.7730722525804493	15.149044275283813	14.0	0.6782608695652174	0.6428571428571429	0.711864406779661
138	14.0	0.7304347826086957	0.7413793103448276	0.7192982456140351	0.7304782082324455	0.7288135593220338	0.7321428571428571	0.7303532259284471	1.3015153408050537	14.0	0.782608695652174	0.8035714285714286	0.7627118644067796	0.7831416464891041	0.7627118644067796	0.8035714285714286	0.782608695652174	6.8838050365448	14.0	0.7739130434782608	0.7323943661971831	0.8409090909090909	0.7710351089588378	0.8813559322033898	0.6607142857142857	0.77	10.546848058700562	14.0	0.7130434782608696	0.7166666666666667	0.7090909090909091	0.7126210653753027	0.7288135593220338	0.6964285714285714	0.7126958891664774	11.563024282455444	14.0	0.6956521739130435	0.6818181818181818	0.7142857142857143	0.6938559322033898	0.7627118644067796	0.625	0.6933333333333332	16.433227062225342	14.0	0.7304347826086957	0.75	0.711864406779661
139	14.0	0.7391304347826086	0.82	0.676923076923077	0.7457395009129641	0.6612903225806451	0.8301886792452831	0.738952784503632	1.3301243782043457	14.0	0.782608695652174	0.8245614035087719	0.7413793103448276	0.7846926354230067	0.7580645161290323	0.8113207547169812	0.7823453705806647	6.891716718673706	14.0	0.8	0.782608695652174	0.8260869565217391	0.7939744370054778	0.8709677419354839	0.7169811320754716	0.7960521242963992	10.72315526008606	14.0	0.6869565217391305	0.696969696969697	0.673469387755102	0.6822884966524649	0.7419354838709677	0.6226415094339622	0.6829044117647058	11.692812442779541	14.0	0.7043478260869566	0.7592592592592593	0.6557377049180327	0.7080036518563604	0.6612903225806451	0.7547169811320755	0.7043254688445251	17.930188417434692	14.0	0.7478260869565218	0.7796610169491526	0.7142857142857143
140	15.0	0.7327586206896551	0.7017543859649122	0.7627118644067796	0.733273596176822	0.7407407407407407	0.7258064516129032	0.7322611868066413	1.6644175052642822	15.0	0.8017241379310345	0.7627118644067796	0.8421052631578947	0.803763440860215	0.8333333333333334	0.7741935483870968	0.8015914330333903	7.388887643814087	15.0	0.7586206896551724	0.6805555555555556	0.8863636363636364	0.7682198327359617	0.9074074074074074	0.6290322580645161	0.7568134171907757	10.520021915435791	15.0	0.7672413793103449	0.7454545454545455	0.7868852459016393	0.766726403823178	0.7592592592592593	0.7741935483870968	0.7663906914298502	12.457646131515503	15.0	0.7672413793103449	0.7454545454545455	0.7868852459016393	0.766726403823178	0.7592592592592593	0.7741935483870968	0.7663906914298502	16.500575065612793	15.0	0.75	0.6923076923076923	0.8235294117647058
141	15.0	0.7652173913043478	0.7272727272727273	0.8	0.7655677655677655	0.7692307692307693	0.7619047619047619	0.7640756781399589	1.7067756652832031	15.0	0.7652173913043478	0.6923076923076923	0.86	0.773962148962149	0.8653846153846154	0.6825396825396826	0.7651463580667119	6.996405124664307	15.0	0.7391304347826086	0.6571428571428571	0.8666666666666667	0.7518315018315018	0.8846153846153846	0.6190476190476191	0.73816029143898	10.494038343429565	15.0	0.7565217391304347	0.7142857142857143	0.7966101694915254	0.7576312576312576	0.7692307692307693	0.746031746031746	0.7556162720097146	12.336427450180054	15.0	0.7391304347826086	0.6833333333333333	0.8	0.7434371184371185	0.7884615384615384	0.6984126984126984	0.7389527845036319	15.140571594238281	15.0	0.6608695652173913	0.6226415094339622	0.6935483870967742
142	15.0	0.8173913043478261	0.78	0.8461538461538461	0.814625850340136	0.7959183673469388	0.8333333333333334	0.8137867221836688	1.5977404117584229	15.0	0.808695652173913	0.7454545454545455	0.8666666666666667	0.8123067408781695	0.8367346938775511	0.7878787878787878	0.806929181929182	7.012887477874756	15.0	0.808695652173913	0.7076923076923077	0.94	0.8254483611626469	0.9387755102040817	0.7121212121212122	0.8086811857229281	11.34185266494751	15.0	0.7739130434782608	0.7674418604651163	0.7777777777777778	0.7609771181199753	0.673469387755102	0.8484848484848485	0.7644927536231882	12.947575092315674	15.0	0.7565217391304347	0.6842105263157895	0.8275862068965517	0.761595547309833	0.7959183673469388	0.7272727272727273	0.7550213024954351	17.10806155204773	15.0	0.7565217391304347	0.6909090909090909	0.8166666666666667
143	15.0	0.7739130434782608	0.8181818181818182	0.7333333333333333	0.7762598664238008	0.7377049180327869	0.8148148148148148	0.7738959467634603	1.4834089279174805	15.0	0.7304347826086957	0.75	0.7090909090909091	0.7299635701275046	0.7377049180327869	0.7222222222222222	0.7296989915838956	6.875890493392944	15.0	0.7565217391304347	0.7619047619047619	0.75	0.7545537340619308	0.7868852459016393	0.7222222222222222	0.7550213024954351	9.739814758300781	15.0	0.7217391304347827	0.7636363636363637	0.6833333333333333	0.7238919247115969	0.6885245901639344	0.7592592592592593	0.7217180883242589	12.113179922103882	15.0	0.7565217391304347	0.7704918032786885	0.7407407407407407	0.7556162720097146	0.7704918032786885	0.7407407407407407	0.7556162720097146	17.639119148254395	15.0	0.8	0.796875	0.803921568627451
144	15.0	0.8	0.8181818181818182	0.7833333333333333	0.8002117362371446	0.7758620689655172	0.8245614035087719	0.7999394902049769	1.5507535934448242	15.0	0.7304347826086957	0.7872340425531915	0.6911764705882353	0.7312462189957654	0.6379310344827587	0.8245614035087719	0.7283809523809524	6.61157488822937	15.0	0.6782608695652174	0.6909090909090909	0.6666666666666666	0.6784633998790078	0.6551724137931034	0.7017543859649122	0.6781635277210498	10.367036581039429	15.0	0.7391304347826086	0.7692307692307693	0.7142857142857143	0.7395644283121597	0.6896551724137931	0.7894736842105263	0.7386363636363638	11.931984186172485	15.0	0.7652173913043478	0.7818181818181819	0.75	0.765426497277677	0.7413793103448276	0.7894736842105263	0.7651463580667119	17.087281465530396	15.0	0.7217391304347827	0.7321428571428571	0.711864406779661
145	15.0	0.7652173913043478	0.8035714285714286	0.7288135593220338	0.7670006071645417	0.7377049180327869	0.7962962962962963	0.7651463580667122	1.504037857055664	15.0	0.782608695652174	0.78125	0.7843137254901961	0.7802064359441409	0.819672131147541	0.7407407407407407	0.7809523809523808	6.1583850383758545	15.0	0.7304347826086957	0.7205882352941176	0.7446808510638298	0.7257134183363692	0.8032786885245902	0.6481481481481481	0.7263796147056567	10.587639331817627	15.0	0.7652173913043478	0.8035714285714286	0.7288135593220338	0.7670006071645417	0.7377049180327869	0.7962962962962963	0.7651463580667122	11.387035369873047	15.0	0.7304347826086957	0.7419354838709677	0.7169811320754716	0.7289010321797207	0.7540983606557377	0.7037037037037037	0.7291239267532863	17.879090785980225	15.0	0.6521739130434783	0.6779661016949152	0.625
146	15.0	0.7739130434782608	0.7868852459016393	0.7592592592592593	0.7730722525804493	0.7868852459016393	0.7592592592592593	0.7730722525804492	1.878819227218628	15.0	0.808695652173913	0.8545454545454545	0.7666666666666667	0.8111718275652702	0.7704918032786885	0.8518518518518519	0.808681185722928	6.943315744400024	15.0	0.6434782608695652	0.6612903225806451	0.6226415094339622	0.6416211293260474	0.6721311475409836	0.6111111111111112	0.6417445482866043	10.150736331939697	15.0	0.7739130434782608	0.7868852459016393	0.7592592592592593	0.7730722525804493	0.7868852459016393	0.7592592592592593	0.7730722525804492	12.151939868927002	15.0	0.7652173913043478	0.7741935483870968	0.7547169811320755	0.76381299332119	0.7868852459016393	0.7407407407407407	0.764075678139959	18.95653200149536	15.0	0.7217391304347827	0.7301587301587301	0.7115384615384616
147	15.0	0.7478260869565218	0.7222222222222222	0.7704918032786885	0.7469567863664028	0.7358490566037735	0.7580645161290323	0.7465998024466226	1.7068583965301514	15.0	0.6956521739130435	0.65	0.7454545454545455	0.6985696895922093	0.7358490566037735	0.6612903225806451	0.6955600937901824	6.4893341064453125	15.0	0.7304347826086957	0.6527777777777778	0.8604651162790697	0.7417833231892879	0.8867924528301887	0.5967741935483871	0.7283809523809524	10.261907577514648	15.0	0.6956521739130435	0.65	0.7454545454545455	0.6985696895922093	0.7358490566037735	0.6612903225806451	0.6955600937901824	12.360308170318604	15.0	0.7565217391304347	0.7272727272727273	0.7833333333333333	0.7563907486305539	0.7547169811320755	0.7580645161290323	0.7556162720097146	17.750450372695923	15.0	0.6956521739130435	0.6666666666666666	0.7213114754098361
148	15.0	0.7130434782608696	0.7166666666666667	0.7090909090909091	0.7126210653753027	0.7288135593220338	0.6964285714285714	0.7126958891664774	1.490114688873291	15.0	0.7652173913043478	0.7857142857142857	0.7457627118644068	0.7657384987893463	0.7457627118644068	0.7857142857142857	0.7652173913043477	6.550509214401245	15.0	0.7739130434782608	0.726027397260274	0.8571428571428571	0.7705811138014529	0.8983050847457628	0.6428571428571429	0.7688620902906618	10.985151290893555	15.0	0.7130434782608696	0.7166666666666667	0.7090909090909091	0.7126210653753027	0.7288135593220338	0.6964285714285714	0.7126958891664774	11.441165924072266	15.0	0.7217391304347827	0.7142857142857143	0.7307692307692307	0.7206416464891041	0.7627118644067796	0.6785714285714286	0.7207043108682454	17.26290798187256	15.0	0.7652173913043478	0.7962962962962963	0.7377049180327869
149	15.0	0.7304347826086957	0.803921568627451	0.671875	0.7363055386488131	0.6612903225806451	0.8113207547169812	0.7303532259284471	1.4751250743865967	15.0	0.7565217391304347	0.8035714285714286	0.711864406779661	0.7591296409007913	0.7258064516129032	0.7924528301886793	0.7563559322033899	6.755611181259155	15.0	0.808695652173913	0.803030303030303	0.8163265306122449	0.8047778454047474	0.8548387096774194	0.7547169811320755	0.8062193627450981	10.26976466178894	15.0	0.6869565217391305	0.7096774193548387	0.660377358490566	0.6850273889227023	0.7096774193548387	0.660377358490566	0.6850273889227024	11.636305809020996	15.0	0.7304347826086957	0.7540983606557377	0.7037037037037037	0.7294583079732198	0.7419354838709677	0.7169811320754716	0.7291239267532863	17.656646728515625	15.0	0.7478260869565218	0.7704918032786885	0.7222222222222222
150	16.0	0.7327586206896551	0.6949152542372882	0.7719298245614035	0.734468339307049	0.7592592592592593	0.7096774193548387	0.7325797575667434	1.6638619899749756	16.0	0.7844827586206896	0.7543859649122807	0.8135593220338984	0.7852449223416965	0.7962962962962963	0.7741935483870968	0.7840816022634205	6.659595251083374	16.0	0.75	0.676056338028169	0.8666666666666667	0.7589605734767024	0.8888888888888888	0.6290322580645161	0.7484859813084113	10.585679531097412	16.0	0.7586206896551724	0.7321428571428571	0.7833333333333333	0.7586618876941458	0.7592592592592593	0.7580645161290323	0.7579731743666169	12.128837585449219	16.0	0.7758620689655172	0.75	0.8	0.7759856630824373	0.7777777777777778	0.7741935483870968	0.7752608047690015	17.70285129547119	16.0	0.7241379310344828	0.6666666666666666	0.8
151	16.0	0.7913043478260869	0.7413793103448276	0.8421052631578947	0.7944139194139194	0.8269230769230769	0.7619047619047619	0.7909090909090909	1.6586322784423828	16.0	0.782608695652174	0.7288135593220338	0.8392857142857143	0.7864774114774115	0.8269230769230769	0.746031746031746	0.7823453705806647	6.940835475921631	16.0	0.7478260869565218	0.6666666666666666	0.8695652173913043	0.7597680097680097	0.8846153846153846	0.6349206349206349	0.7471377663204185	10.23633098602295	16.0	0.7913043478260869	0.7692307692307693	0.8095238095238095	0.7893772893772895	0.7692307692307693	0.8095238095238095	0.7893772893772895	12.218991994857788	16.0	0.7304347826086957	0.6666666666666666	0.8076923076923077	0.7371794871794872	0.8076923076923077	0.6666666666666666	0.7304347826086955	18.511438846588135	16.0	0.6434782608695652	0.6	0.6833333333333333
152	16.0	0.8347826086956521	0.8125	0.8507462686567164	0.8297773654916512	0.7959183673469388	0.8636363636363636	0.8306332842415316	1.5996513366699219	16.0	0.8	0.7321428571428571	0.864406779661017	0.8047309833024119	0.8367346938775511	0.7727272727272727	0.7984761904761905	6.546103000640869	16.0	0.7913043478260869	0.6865671641791045	0.9375	0.8102968460111317	0.9387755102040817	0.6818181818181818	0.7912885662431943	10.110562801361084	16.0	0.8260869565217391	0.8372093023255814	0.8194444444444444	0.8143166357452072	0.7346938775510204	0.8939393939393939	0.818840579710145	12.819871425628662	16.0	0.782608695652174	0.7307692307692307	0.8253968253968254	0.7816944959802102	0.7755102040816326	0.7878787878787878	0.7793383989561746	17.751856565475464	16.0	0.7304347826086957	0.6730769230769231	0.7777777777777778
153	16.0	0.808695652173913	0.8979591836734694	0.7424242424242424	0.8143594414086217	0.7213114754098361	0.9074074074074074	0.8083333333333333	1.4679374694824219	16.0	0.8	0.8518518518518519	0.7540983606557377	0.8029751062537948	0.7540983606557377	0.8518518518518519	0.7999999999999999	6.610086917877197	16.0	0.7565217391304347	0.7619047619047619	0.75	0.7545537340619308	0.7868852459016393	0.7222222222222222	0.7550213024954351	8.843323469161987	16.0	0.7217391304347827	0.7377049180327869	0.7037037037037037	0.7207043108682454	0.7377049180327869	0.7037037037037037	0.7207043108682454	11.828669786453247	16.0	0.7652173913043478	0.8148148148148148	0.7213114754098361	0.7680631451123254	0.7213114754098361	0.8148148148148148	0.7652173913043478	16.92648720741272	16.0	0.7478260869565218	0.75	0.7450980392156863
154	16.0	0.7913043478260869	0.8269230769230769	0.7619047619047619	0.7917422867513612	0.7413793103448276	0.8421052631578947	0.7909090909090909	1.6092772483825684	16.0	0.7739130434782608	0.8478260869565217	0.7246376811594203	0.7748033877797943	0.6724137931034483	0.8771929824561403	0.7718253968253967	6.696778297424316	16.0	0.6956521739130435	0.7017543859649122	0.6896551724137931	0.6957047791893527	0.6896551724137931	0.7017543859649122	0.6956521739130435	10.130648136138916	16.0	0.7565217391304347	0.7777777777777778	0.7377049180327869	0.7568058076225046	0.7241379310344828	0.7894736842105263	0.7563559322033899	11.537582635879517	16.0	0.7652173913043478	0.7719298245614035	0.7586206896551724	0.7652752571082879	0.7586206896551724	0.7719298245614035	0.7652173913043477	17.70210552215576	16.0	0.7478260869565218	0.7543859649122807	0.7413793103448276
155	16.0	0.8	0.8064516129032258	0.7924528301886793	0.7987249544626593	0.819672131147541	0.7777777777777778	0.7990274295266317	1.546529769897461	16.0	0.808695652173913	0.819672131147541	0.7962962962962963	0.8079842137219186	0.819672131147541	0.7962962962962963	0.8079842137219186	6.570903539657593	16.0	0.7304347826086957	0.7142857142857143	0.7555555555555555	0.7246508803885854	0.819672131147541	0.6296296296296297	0.7251137327473205	10.765690803527832	16.0	0.7739130434782608	0.7868852459016393	0.7592592592592593	0.7730722525804493	0.7868852459016393	0.7592592592592593	0.7730722525804492	10.880852460861206	16.0	0.7565217391304347	0.7619047619047619	0.75	0.7545537340619308	0.7868852459016393	0.7222222222222222	0.7550213024954351	18.726688623428345	16.0	0.6869565217391305	0.7049180327868853	0.6666666666666666
156	16.0	0.8	0.7794117647058824	0.8297872340425532	0.7955373406193078	0.8688524590163934	0.7222222222222222	0.7969913270396807	1.9350993633270264	16.0	0.7913043478260869	0.8490566037735849	0.7419354838709677	0.7947783849423193	0.7377049180327869	0.8518518518518519	0.7912885662431942	6.669823169708252	16.0	0.6782608695652174	0.6935483870967742	0.660377358490566	0.6765330904675166	0.7049180327868853	0.6481481481481481	0.6766962996732772	11.282661199569702	16.0	0.7478260869565218	0.7580645161290323	0.7358490566037735	0.7463570127504553	0.7704918032786885	0.7222222222222222	0.7465998024466226	12.301567792892456	16.0	0.7478260869565218	0.7580645161290323	0.7358490566037735	0.7463570127504553	0.7704918032786885	0.7222222222222222	0.7465998024466226	18.08981227874756	16.0	0.7043478260869566	0.6956521739130435	0.717391304347826
157	16.0	0.7652173913043478	0.75	0.7777777777777778	0.7630858186244673	0.7358490566037735	0.7903225806451613	0.7634285714285713	1.6847872734069824	16.0	0.7304347826086957	0.6896551724137931	0.7719298245614035	0.7321972002434571	0.7547169811320755	0.7096774193548387	0.7301082595200242	6.725424528121948	16.0	0.7478260869565218	0.6666666666666666	0.8837209302325582	0.7592818015824712	0.9056603773584906	0.6129032258064516	0.7459047619047618	10.609535932540894	16.0	0.7217391304347827	0.6909090909090909	0.75	0.7213937918441875	0.7169811320754716	0.7258064516129032	0.7207043108682454	13.023407459259033	16.0	0.7565217391304347	0.7192982456140351	0.7931034482758621	0.7577601947656726	0.7735849056603774	0.7419354838709677	0.7560606060606061	17.49751114845276	16.0	0.7043478260869566	0.6727272727272727	0.7333333333333333
158	16.0	0.7217391304347827	0.7288135593220338	0.7142857142857143	0.7215496368038741	0.7288135593220338	0.7142857142857143	0.7215496368038741	1.5148100852966309	16.0	0.7130434782608696	0.7321428571428571	0.6949152542372882	0.7135290556900726	0.6949152542372882	0.7321428571428571	0.7130434782608696	6.101232290267944	16.0	0.7913043478260869	0.7397260273972602	0.8809523809523809	0.7879842615012107	0.9152542372881356	0.6607142857142857	0.7866419294990723	10.468864679336548	16.0	0.6869565217391305	0.6885245901639344	0.6851851851851852	0.6862893462469734	0.711864406779661	0.6607142857142857	0.6863636363636363	11.715872526168823	16.0	0.7391304347826086	0.7301587301587301	0.75	0.7380447941888619	0.7796610169491526	0.6964285714285714	0.73816029143898	17.342018842697144	16.0	0.7217391304347827	0.7368421052631579	0.7068965517241379
159	16.0	0.7739130434782608	0.8214285714285714	0.7288135593220338	0.7766281192939745	0.7419354838709677	0.8113207547169812	0.7737590799031477	1.5580790042877197	16.0	0.7565217391304347	0.8148148148148148	0.7049180327868853	0.76049908703591	0.7096774193548387	0.8113207547169812	0.7565033272837265	5.664774179458618	16.0	0.8	0.782608695652174	0.8260869565217391	0.7939744370054778	0.8709677419354839	0.7169811320754716	0.7960521242963992	10.126750230789185	16.0	0.6956521739130435	0.7368421052631579	0.6551724137931034	0.6972002434570906	0.6774193548387096	0.7169811320754716	0.6952835188129305	11.349972248077393	16.0	0.7043478260869566	0.7333333333333333	0.6727272727272727	0.7038953134510042	0.7096774193548387	0.6981132075471698	0.7032483302975107	18.205060243606567	16.0	0.7130434782608696	0.7457627118644068	0.6785714285714286
160	17.0	0.7586206896551724	0.7321428571428571	0.7833333333333333	0.7586618876941458	0.7592592592592593	0.7580645161290323	0.7579731743666169	1.6528873443603516	17.0	0.7931034482758621	0.7777777777777778	0.8064516129032258	0.7921146953405018	0.7777777777777778	0.8064516129032258	0.7921146953405018	6.632803201675415	17.0	0.7413793103448276	0.6764705882352942	0.8333333333333334	0.7485065710872163	0.8518518518518519	0.6451612903225806	0.7406855439642325	10.405974864959717	17.0	0.8620689655172413	0.8518518518518519	0.8709677419354839	0.8614097968936678	0.8518518518518519	0.8709677419354839	0.8614097968936678	12.848051071166992	17.0	0.7758620689655172	0.7413793103448276	0.8103448275862069	0.7771804062126643	0.7962962962962963	0.7580645161290323	0.7755952380952381	18.400248289108276	17.0	0.7327586206896551	0.676923076923077	0.803921568627451
161	17.0	0.8	0.7636363636363637	0.8333333333333334	0.8006715506715507	0.8076923076923077	0.7936507936507936	0.7990274295266317	1.63150954246521	17.0	0.8260869565217391	0.7666666666666667	0.8909090909090909	0.8311965811965811	0.8846153846153846	0.7777777777777778	0.8259685230024214	6.416666030883789	17.0	0.7391304347826086	0.6571428571428571	0.8666666666666667	0.7518315018315018	0.8846153846153846	0.6190476190476191	0.73816029143898	10.430994272232056	17.0	0.8	0.7843137254901961	0.8125	0.7973137973137974	0.7692307692307693	0.8253968253968254	0.7977983334607446	13.02424931526184	17.0	0.7739130434782608	0.703125	0.8627450980392157	0.7818986568986569	0.8653846153846154	0.6984126984126984	0.7738959467634603	17.891129732131958	17.0	0.6956521739130435	0.6545454545454545	0.7333333333333333
162	17.0	0.7739130434782608	0.7254901960784313	0.8125	0.7714904143475572	0.7551020408163265	0.7878787878787878	0.77	1.6258654594421387	17.0	0.8	0.7407407407407407	0.8524590163934426	0.8021026592455164	0.8163265306122449	0.7878787878787878	0.7977983334607447	6.713543891906738	17.0	0.8	0.696969696969697	0.9387755102040817	0.8178726035868893	0.9387755102040817	0.696969696969697	0.8000000000000002	10.929155111312866	17.0	0.7739130434782608	0.7674418604651163	0.7777777777777778	0.7609771181199753	0.673469387755102	0.8484848484848485	0.7644927536231882	13.74373984336853	17.0	0.7565217391304347	0.6909090909090909	0.8166666666666667	0.7589672232529375	0.7755102040816326	0.7424242424242424	0.7542735042735043	18.954038619995117	17.0	0.7652173913043478	0.6896551724137931	0.8421052631578947
163	17.0	0.8260869565217391	0.8867924528301887	0.7741935483870968	0.8296903460837887	0.7704918032786885	0.8888888888888888	0.8260738052026618	1.506476640701294	17.0	0.7565217391304347	0.8	0.7166666666666667	0.7588038858530661	0.7213114754098361	0.7962962962962963	0.7565033272837265	6.6821441650390625	17.0	0.7478260869565218	0.75	0.7450980392156863	0.7452944748026715	0.7868852459016393	0.7037037037037037	0.745904761904762	10.252273082733154	17.0	0.7391304347826086	0.7924528301886793	0.6935483870967742	0.7424104432301153	0.6885245901639344	0.7962962962962963	0.7391107078039927	12.313624858856201	17.0	0.782608695652174	0.8103448275862069	0.7543859649122807	0.7833940497874924	0.7704918032786885	0.7962962962962963	0.7823453705806647	16.893040418624878	17.0	0.7652173913043478	0.765625	0.7647058823529411
164	17.0	0.7478260869565218	0.7843137254901961	0.71875	0.7483363581367211	0.6896551724137931	0.8070175438596491	0.7471377663204186	1.5667939186096191	17.0	0.782608695652174	0.8	0.7666666666666667	0.7828191167574108	0.7586206896551724	0.8070175438596491	0.7825429241358445	6.423041105270386	17.0	0.7130434782608696	0.711864406779661	0.7142857142857143	0.7129461584996974	0.7241379310344828	0.7017543859649122	0.7129566598593147	10.247072219848633	17.0	0.7739130434782608	0.8076923076923077	0.746031746031746	0.7743496672716274	0.7241379310344828	0.8245614035087719	0.7734848484848484	11.691802501678467	17.0	0.7478260869565218	0.7735849056603774	0.7258064516129032	0.7481851179673321	0.7068965517241379	0.7894736842105263	0.747520629873571	17.276322841644287	17.0	0.7217391304347827	0.7407407407407407	0.7049180327868853
165	17.0	0.7913043478260869	0.8032786885245902	0.7777777777777778	0.790528233151184	0.8032786885245902	0.7777777777777778	0.790528233151184	1.552405595779419	17.0	0.8	0.796875	0.803921568627451	0.7976624165148756	0.8360655737704918	0.7592592592592593	0.7984761904761905	6.519169092178345	17.0	0.7739130434782608	0.7611940298507462	0.7916666666666666	0.7698846387370978	0.8360655737704918	0.7037037037037037	0.7709865196078431	10.03021240234375	17.0	0.8	0.8392857142857143	0.7627118644067796	0.8019125683060109	0.7704918032786885	0.8333333333333334	0.799939490204977	11.8094642162323	17.0	0.8	0.8275862068965517	0.7719298245614035	0.8008500303582271	0.7868852459016393	0.8148148148148148	0.7997577409342116	18.88414430618286	17.0	0.7043478260869566	0.7213114754098361	0.6851851851851852
166	17.0	0.7652173913043478	0.765625	0.7647058823529411	0.7627504553734061	0.8032786885245902	0.7222222222222222	0.7634285714285713	1.9120087623596191	17.0	0.8	0.8518518518518519	0.7540983606557377	0.8029751062537948	0.7540983606557377	0.8518518518518519	0.7999999999999999	6.681463956832886	17.0	0.6869565217391305	0.6984126984126984	0.6730769230769231	0.6847298117789922	0.7213114754098361	0.6481481481481481	0.6850273889227024	10.231298446655273	17.0	0.7565217391304347	0.7619047619047619	0.75	0.7545537340619308	0.7868852459016393	0.7222222222222222	0.7550213024954351	12.393752813339233	17.0	0.782608695652174	0.7903225806451613	0.7735849056603774	0.7812689738919247	0.8032786885245902	0.7592592592592593	0.7815515538332953	18.164700031280518	17.0	0.6869565217391305	0.6984126984126984	0.6730769230769231
167	17.0	0.7565217391304347	0.7272727272727273	0.7833333333333333	0.7563907486305539	0.7547169811320755	0.7580645161290323	0.7556162720097146	1.6831696033477783	17.0	0.7217391304347827	0.6779661016949152	0.7678571428571429	0.7241326841144249	0.7547169811320755	0.6935483870967742	0.7215496368038741	6.674379348754883	17.0	0.7565217391304347	0.676056338028169	0.8863636363636364	0.7673463177115034	0.9056603773584906	0.6290322580645161	0.7550213024954351	10.977046966552734	17.0	0.6782608695652174	0.6333333333333333	0.7272727272727273	0.6810712111990261	0.7169811320754716	0.6451612903225806	0.6781635277210498	12.346662998199463	17.0	0.7217391304347827	0.6842105263157895	0.7586206896551724	0.7227632379793061	0.7358490566037735	0.7096774193548387	0.7212121212121212	19.0625102519989	17.0	0.6782608695652174	0.6481481481481481	0.7049180327868853
168	17.0	0.7217391304347827	0.7288135593220338	0.7142857142857143	0.7215496368038741	0.7288135593220338	0.7142857142857143	0.7215496368038741	1.5349364280700684	17.0	0.7739130434782608	0.7894736842105263	0.7586206896551724	0.7742130750605327	0.7627118644067796	0.7857142857142857	0.7738959467634603	6.557528734207153	17.0	0.808695652173913	0.7605633802816901	0.8863636363636364	0.8058414043583535	0.9152542372881356	0.6964285714285714	0.8053846153846154	10.13607144355774	17.0	0.7217391304347827	0.7288135593220338	0.7142857142857143	0.7215496368038741	0.7288135593220338	0.7142857142857143	0.7215496368038741	11.366084814071655	17.0	0.7478260869565218	0.7419354838709677	0.7547169811320755	0.7469733656174334	0.7796610169491526	0.7142857142857143	0.7471377663204186	17.69242787361145	17.0	0.7391304347826086	0.7735849056603774	0.7096774193548387
169	17.0	0.808695652173913	0.8703703703703703	0.7540983606557377	0.8129945222154595	0.7580645161290323	0.8679245283018868	0.8086811857229279	1.5761432647705078	17.0	0.7565217391304347	0.8148148148148148	0.7049180327868853	0.76049908703591	0.7096774193548387	0.8113207547169812	0.7565033272837265	6.625663757324219	17.0	0.8173913043478261	0.7971014492753623	0.8478260869565217	0.811472915398661	0.8870967741935484	0.7358490566037735	0.8137867221836688	10.607719421386719	17.0	0.6608695652173913	0.6825396825396826	0.6346153846153846	0.6580949482653682	0.6935483870967742	0.6226415094339622	0.6582857142857143	12.24944257736206	17.0	0.7304347826086957	0.7627118644067796	0.6964285714285714	0.7308277541083383	0.7258064516129032	0.7358490566037735	0.7296989915838956	17.51029062271118	17.0	0.7130434782608696	0.7457627118644068	0.6785714285714286
170	18.0	0.7844827586206896	0.7543859649122807	0.8135593220338984	0.7852449223416965	0.7962962962962963	0.7741935483870968	0.7840816022634205	1.6934659481048584	18.0	0.7672413793103449	0.7288135593220338	0.8070175438596491	0.769115890083632	0.7962962962962963	0.7419354838709677	0.7670855953000669	6.716285943984985	18.0	0.7413793103448276	0.6764705882352942	0.8333333333333334	0.7485065710872163	0.8518518518518519	0.6451612903225806	0.7406855439642325	11.076229572296143	18.0	0.7844827586206896	0.7735849056603774	0.7936507936507936	0.7828554360812425	0.7592592592592593	0.8064516129032258	0.7831775700934579	13.02763319015503	18.0	0.7672413793103449	0.7368421052631579	0.7966101694915254	0.7679211469534051	0.7777777777777778	0.7580645161290323	0.766808130444494	19.42674994468689	18.0	0.7327586206896551	0.676923076923077	0.803921568627451
171	18.0	0.8173913043478261	0.803921568627451	0.828125	0.8148656898656899	0.7884615384615384	0.8412698412698413	0.8153810870728537	1.696413516998291	18.0	0.8	0.7457627118644068	0.8571428571428571	0.8040293040293041	0.8461538461538461	0.7619047619047619	0.7997577409342116	6.68144679069519	18.0	0.7739130434782608	0.696969696969697	0.8775510204081632	0.7835775335775336	0.8846153846153846	0.6825396825396826	0.7737590799031477	10.67599630355835	18.0	0.7913043478260869	0.7692307692307693	0.8095238095238095	0.7893772893772895	0.7692307692307693	0.8095238095238095	0.7893772893772895	12.119518280029297	18.0	0.7652173913043478	0.7049180327868853	0.8333333333333334	0.7706043956043955	0.8269230769230769	0.7142857142857143	0.7651463580667119	18.972200632095337	18.0	0.6782608695652174	0.6363636363636364	0.7166666666666667
172	18.0	0.7652173913043478	0.7115384615384616	0.8095238095238095	0.7639146567717996	0.7551020408163265	0.7727272727272727	0.7616854708726687	1.6560940742492676	18.0	0.7913043478260869	0.7192982456140351	0.8620689655172413	0.7971552257266543	0.8367346938775511	0.7575757575757576	0.7900182592818015	6.163070201873779	18.0	0.8	0.703125	0.9215686274509803	0.8152442795299939	0.9183673469387755	0.7121212121212122	0.799939490204977	10.93315315246582	18.0	0.8173913043478261	0.8043478260869565	0.8260869565217391	0.809369202226345	0.7551020408163265	0.8636363636363636	0.8116959064327485	12.879480838775635	18.0	0.8	0.76	0.8307692307692308	0.7968460111317255	0.7755102040816326	0.8181818181818182	0.7960521242963992	21.50149416923523	18.0	0.7391304347826086	0.6666666666666666	0.8103448275862069
173	18.0	0.808695652173913	0.8823529411764706	0.75	0.8132969034608379	0.7377049180327869	0.8888888888888888	0.8085653753026634	1.5197904109954834	18.0	0.782608695652174	0.8333333333333334	0.7377049180327869	0.7855191256830601	0.7377049180327869	0.8333333333333334	0.782608695652174	5.684184789657593	18.0	0.7478260869565218	0.7424242424242424	0.7551020408163265	0.7442319368548878	0.8032786885245902	0.6851851851851852	0.7450500726244171	9.81921124458313	18.0	0.6956521739130435	0.75	0.6507936507936508	0.6993017607771707	0.639344262295082	0.7592592592592593	0.6955600937901822	12.090272426605225	18.0	0.7478260869565218	0.7758620689655172	0.7192982456140351	0.7484820886460231	0.7377049180327869	0.7592592592592593	0.747520629873571	18.482889413833618	18.0	0.8173913043478261	0.8125	0.8235294117647058
174	18.0	0.782608695652174	0.8113207547169812	0.7580645161290323	0.7829703569267998	0.7413793103448276	0.8245614035087719	0.7823453705806647	1.5601427555084229	18.0	0.7652173913043478	0.8297872340425532	0.7205882352941176	0.766031457955233	0.6724137931034483	0.8596491228070176	0.7634285714285713	5.8072075843811035	18.0	0.7130434782608696	0.711864406779661	0.7142857142857143	0.7129461584996974	0.7241379310344828	0.7017543859649122	0.7129566598593147	10.319958925247192	18.0	0.7565217391304347	0.7777777777777778	0.7377049180327869	0.7568058076225046	0.7241379310344828	0.7894736842105263	0.7563559322033899	11.878692865371704	18.0	0.782608695652174	0.8	0.7666666666666667	0.7828191167574108	0.7586206896551724	0.8070175438596491	0.7825429241358445	18.682379722595215	18.0	0.7391304347826086	0.7333333333333333	0.7454545454545455
175	18.0	0.8173913043478261	0.8125	0.8235294117647058	0.8151183970856102	0.8524590163934426	0.7777777777777778	0.8159999999999998	1.503112554550171	18.0	0.7565217391304347	0.7619047619047619	0.75	0.7545537340619308	0.7868852459016393	0.7222222222222222	0.7550213024954351	5.847366809844971	18.0	0.7391304347826086	0.7246376811594203	0.7608695652173914	0.7339101396478446	0.819672131147541	0.6481481481481481	0.7346153846153847	10.327725887298584	18.0	0.8173913043478261	0.8703703703703703	0.7704918032786885	0.8204310868245295	0.7704918032786885	0.8703703703703703	0.817391304347826	12.34310245513916	18.0	0.7478260869565218	0.7857142857142857	0.711864406779661	0.7495446265938069	0.7213114754098361	0.7777777777777778	0.7477497919975796	20.23345160484314	18.0	0.6956521739130435	0.7166666666666667	0.6727272727272727
176	18.0	0.7652173913043478	0.7833333333333333	0.7454545454545455	0.7648755312689739	0.7704918032786885	0.7592592592592593	0.7645765410569414	1.8815677165985107	18.0	0.7913043478260869	0.8363636363636363	0.75	0.7937158469945356	0.7540983606557377	0.8333333333333334	0.7912885662431941	6.858417510986328	18.0	0.6782608695652174	0.6764705882352942	0.6808510638297872	0.6733454766241651	0.7540983606557377	0.5925925925925926	0.6734208304551385	9.133615732192993	18.0	0.782608695652174	0.8	0.7636363636363637	0.7823315118397085	0.7868852459016393	0.7777777777777778	0.7820153157934643	12.387427806854248	18.0	0.782608695652174	0.7727272727272727	0.7959183673469388	0.779143897996357	0.8360655737704918	0.7222222222222222	0.7802155798486354	18.640932321548462	18.0	0.6869565217391305	0.7049180327868853	0.6666666666666666
177	18.0	0.7652173913043478	0.7321428571428571	0.7966101694915254	0.7658247108947048	0.7735849056603774	0.7580645161290323	0.7645765410569414	1.7022151947021484	18.0	0.6782608695652174	0.6333333333333333	0.7272727272727273	0.6810712111990261	0.7169811320754716	0.6451612903225806	0.6781635277210498	6.775018215179443	18.0	0.7478260869565218	0.6666666666666666	0.8837209302325582	0.7592818015824712	0.9056603773584906	0.6129032258064516	0.7459047619047618	9.449530839920044	18.0	0.7130434782608696	0.6724137931034483	0.7543859649122807	0.7146987218502738	0.7358490566037735	0.6935483870967742	0.7126958891664774	12.690577983856201	18.0	0.7478260869565218	0.7222222222222222	0.7704918032786885	0.7469567863664028	0.7358490566037735	0.7580645161290323	0.7465998024466226	19.25772261619568	18.0	0.7043478260869566	0.6792452830188679	0.7258064516129032
178	18.0	0.7565217391304347	0.7924528301886793	0.7258064516129032	0.7577179176755449	0.711864406779661	0.8035714285714286	0.7563559322033899	1.5848209857940674	18.0	0.7130434782608696	0.7407407407407407	0.6885245901639344	0.7139830508474576	0.6779661016949152	0.75	0.7129566598593147	6.878089189529419	18.0	0.7913043478260869	0.7397260273972602	0.8809523809523809	0.7879842615012107	0.9152542372881356	0.6607142857142857	0.7866419294990723	9.478842973709106	18.0	0.6956521739130435	0.7	0.6909090909090909	0.6952179176755449	0.711864406779661	0.6785714285714286	0.6952835188129305	11.747775554656982	18.0	0.7478260869565218	0.7419354838709677	0.7547169811320755	0.7469733656174334	0.7796610169491526	0.7142857142857143	0.7471377663204186	19.265857696533203	18.0	0.7652173913043478	0.7857142857142857	0.7457627118644068
179	18.0	0.7391304347826086	0.82	0.676923076923077	0.7457395009129641	0.6612903225806451	0.8301886792452831	0.738952784503632	1.5951263904571533	18.0	0.7739130434782608	0.8333333333333334	0.7213114754098361	0.7779975654290932	0.7258064516129032	0.8301886792452831	0.7738959467634603	6.226702690124512	18.0	0.8	0.7910447761194029	0.8125	0.7953438831405965	0.8548387096774194	0.7358490566037735	0.7969913270396807	9.847323417663574	18.0	0.6956521739130435	0.7142857142857143	0.6730769230769231	0.6930919050517346	0.7258064516129032	0.660377358490566	0.6933333333333334	11.517594814300537	18.0	0.7130434782608696	0.7457627118644068	0.6785714285714286	0.7133292757151553	0.7096774193548387	0.7169811320754716	0.7122602168473728	18.648958444595337	18.0	0.7304347826086957	0.746031746031746	0.7115384615384616
180	19.0	0.7327586206896551	0.7169811320754716	0.746031746031746	0.730884109916368	0.7037037037037037	0.7580645161290323	0.7311401869158879	1.7267265319824219	19.0	0.8017241379310345	0.7818181818181819	0.819672131147541	0.801373954599761	0.7962962962962963	0.8064516129032258	0.8009994778846872	6.805937051773071	19.0	0.7068965517241379	0.6351351351351351	0.8333333333333334	0.7174432497013142	0.8703703703703703	0.5645161290322581	0.7037259615384616	10.80865740776062	19.0	0.7758620689655172	0.78	0.7727272727272727	0.7724014336917563	0.7222222222222222	0.8225806451612904	0.7734375	12.85905408859253	19.0	0.7327586206896551	0.7017543859649122	0.7627118644067796	0.733273596176822	0.7407407407407407	0.7258064516129032	0.7322611868066413	18.615885496139526	19.0	0.7327586206896551	0.676923076923077	0.803921568627451
181	19.0	0.7652173913043478	0.7192982456140351	0.8103448275862069	0.7672466422466422	0.7884615384615384	0.746031746031746	0.7645765410569414	1.708169937133789	19.0	0.8260869565217391	0.7666666666666667	0.8909090909090909	0.8311965811965811	0.8846153846153846	0.7777777777777778	0.8259685230024214	6.439305782318115	19.0	0.7478260869565218	0.6666666666666666	0.8695652173913043	0.7597680097680097	0.8846153846153846	0.6349206349206349	0.7471377663204185	9.528636932373047	19.0	0.7913043478260869	0.7692307692307693	0.8095238095238095	0.7893772893772895	0.7692307692307693	0.8095238095238095	0.7893772893772895	11.798729181289673	19.0	0.7130434782608696	0.6557377049180327	0.7777777777777778	0.717948717948718	0.7692307692307693	0.6666666666666666	0.7129566598593147	18.85482406616211	19.0	0.6869565217391305	0.66	0.7076923076923077
182	19.0	0.7652173913043478	0.7037037037037037	0.819672131147541	0.7665429808286951	0.7755102040816326	0.7575757575757576	0.7626328262365263	1.643918752670288	19.0	0.7913043478260869	0.711864406779661	0.875	0.7997835497835497	0.8571428571428571	0.7424242424242424	0.7905282331511839	5.728148698806763	19.0	0.8173913043478261	0.71875	0.9411764705882353	0.8330241187384044	0.9387755102040817	0.7272727272727273	0.8173360562741093	10.458220481872559	19.0	0.8347826086956521	0.875	0.8133333333333334	0.8192640692640693	0.7142857142857143	0.9242424242424242	0.8258825404414694	13.191219568252563	19.0	0.7913043478260869	0.7358490566037735	0.8387096774193549	0.7918985776128633	0.7959183673469388	0.7878787878787878	0.7886029411764706	20.04393219947815	19.0	0.7478260869565218	0.6851851851851852	0.8032786885245902
183	19.0	0.8	0.88	0.7384615384615385	0.8051001821493624	0.7213114754098361	0.8888888888888888	0.7997577409342116	1.509908676147461	19.0	0.7652173913043478	0.7931034482758621	0.7368421052631579	0.7659380692167577	0.7540983606557377	0.7777777777777778	0.7649330002271177	5.8947577476501465	19.0	0.7478260869565218	0.7580645161290323	0.7358490566037735	0.7463570127504553	0.7704918032786885	0.7222222222222222	0.7465998024466226	9.940295457839966	19.0	0.7478260869565218	0.8076923076923077	0.6984126984126984	0.7516697024893746	0.6885245901639344	0.8148148148148148	0.7477497919975795	11.92155933380127	19.0	0.782608695652174	0.8103448275862069	0.7543859649122807	0.7833940497874924	0.7704918032786885	0.7962962962962963	0.7823453705806647	18.443023204803467	19.0	0.808695652173913	0.8095238095238095	0.8076923076923077
184	19.0	0.7565217391304347	0.7884615384615384	0.7301587301587301	0.7569570477918934	0.7068965517241379	0.8070175438596491	0.7560606060606061	1.5865745544433594	19.0	0.7478260869565218	0.7843137254901961	0.71875	0.7483363581367211	0.6896551724137931	0.8070175438596491	0.7471377663204186	6.258305549621582	19.0	0.7130434782608696	0.7192982456140351	0.7068965517241379	0.7130973986690865	0.7068965517241379	0.7192982456140351	0.7130434782608696	10.559880256652832	19.0	0.7652173913043478	0.8297872340425532	0.7205882352941176	0.766031457955233	0.6724137931034483	0.8596491228070176	0.7634285714285713	11.62391972541809	19.0	0.8	0.7966101694915254	0.8035714285714286	0.7999092558983666	0.8103448275862069	0.7894736842105263	0.7999394902049768	22.04885172843933	19.0	0.7652173913043478	0.746031746031746	0.7884615384615384
185	19.0	0.8	0.8064516129032258	0.7924528301886793	0.7987249544626593	0.819672131147541	0.7777777777777778	0.7990274295266317	1.4973506927490234	19.0	0.7391304347826086	0.7246376811594203	0.7608695652173914	0.7339101396478446	0.819672131147541	0.6481481481481481	0.7346153846153847	6.218217134475708	19.0	0.7652173913043478	0.7428571428571429	0.8	0.7595628415300546	0.8524590163934426	0.6666666666666666	0.7605829285218597	9.229841470718384	19.0	0.782608695652174	0.8333333333333334	0.7377049180327869	0.7855191256830601	0.7377049180327869	0.8333333333333334	0.782608695652174	11.225899934768677	19.0	0.7304347826086957	0.7419354838709677	0.7169811320754716	0.7289010321797207	0.7540983606557377	0.7037037037037037	0.7291239267532863	17.967203617095947	19.0	0.6869565217391305	0.6984126984126984	0.6730769230769231
186	19.0	0.7913043478260869	0.8135593220338984	0.7678571428571429	0.7915907710989678	0.7868852459016393	0.7962962962962963	0.790909090909091	1.8828620910644531	19.0	0.782608695652174	0.8214285714285714	0.7457627118644068	0.7844565877352763	0.7540983606557377	0.8148148148148148	0.7825429241358446	6.741672039031982	19.0	0.7130434782608696	0.7121212121212122	0.7142857142857143	0.7093199757134183	0.7704918032786885	0.6481481481481481	0.7098845654001987	9.686766386032104	19.0	0.7478260869565218	0.7580645161290323	0.7358490566037735	0.7463570127504553	0.7704918032786885	0.7222222222222222	0.7465998024466226	11.481032133102417	19.0	0.7739130434782608	0.7692307692307693	0.78	0.7709471766848817	0.819672131147541	0.7222222222222222	0.771825396825397	17.53655242919922	19.0	0.7043478260869566	0.7142857142857143	0.6923076923076923
187	19.0	0.7565217391304347	0.7358490566037735	0.7741935483870968	0.7550213024954351	0.7358490566037735	0.7741935483870968	0.7550213024954351	1.6426265239715576	19.0	0.7043478260869566	0.6557377049180327	0.7592592592592593	0.7080036518563604	0.7547169811320755	0.6612903225806451	0.7043254688445251	6.804751873016357	19.0	0.7478260869565218	0.6714285714285714	0.8666666666666667	0.7579123554473524	0.8867924528301887	0.6290322580645161	0.7465998024466226	10.623676061630249	19.0	0.7217391304347827	0.6842105263157895	0.7586206896551724	0.7227632379793061	0.7358490566037735	0.7096774193548387	0.7212121212121212	12.030806541442871	19.0	0.7565217391304347	0.711864406779661	0.8035714285714286	0.7591296409007913	0.7924528301886793	0.7258064516129032	0.7563559322033899	18.29934287071228	19.0	0.6782608695652174	0.6481481481481481	0.7049180327868853
188	19.0	0.7478260869565218	0.7678571428571429	0.7288135593220338	0.7483353510895884	0.7288135593220338	0.7678571428571429	0.7478260869565218	1.5132477283477783	19.0	0.7478260869565218	0.7586206896551724	0.7368421052631579	0.7478813559322034	0.7457627118644068	0.75	0.7477497919975795	6.8369433879852295	19.0	0.808695652173913	0.7681159420289855	0.8695652173913043	0.8062953995157385	0.8983050847457628	0.7142857142857143	0.806219362745098	10.7490873336792	19.0	0.7217391304347827	0.7368421052631579	0.7068965517241379	0.722003631961259	0.711864406779661	0.7321428571428571	0.7217180883242589	11.368316888809204	19.0	0.7478260869565218	0.7419354838709677	0.7547169811320755	0.7469733656174334	0.7796610169491526	0.7142857142857143	0.7471377663204186	18.585561990737915	19.0	0.7478260869565218	0.7678571428571429	0.7288135593220338
189	19.0	0.7217391304347827	0.8	0.6615384615384615	0.7282410225197808	0.6451612903225806	0.8113207547169812	0.7215496368038741	1.529676914215088	19.0	0.7652173913043478	0.8181818181818182	0.7166666666666667	0.7685636031649422	0.7258064516129032	0.8113207547169812	0.765146358066712	6.5416717529296875	19.0	0.7913043478260869	0.7794117647058824	0.8085106382978723	0.7859099208764455	0.8548387096774194	0.7169811320754716	0.7876923076923077	10.578683376312256	19.0	0.6869565217391305	0.7096774193548387	0.660377358490566	0.6850273889227023	0.7096774193548387	0.660377358490566	0.6850273889227024	11.208834886550903	19.0	0.7217391304347827	0.75	0.6909090909090909	0.7213937918441875	0.7258064516129032	0.7169811320754716	0.7207043108682454	18.517240047454834	19.0	0.7043478260869566	0.7333333333333333	0.6727272727272727
190	20.0	0.75	0.7049180327868853	0.8	0.7529868578255675	0.7962962962962963	0.7096774193548387	0.7499814195466369	1.659965991973877	20.0	0.7586206896551724	0.7096774193548387	0.8148148148148148	0.7622461170848267	0.8148148148148148	0.7096774193548387	0.7586206896551724	6.519218921661377	20.0	0.6896551724137931	0.625	0.7954545454545454	0.6989247311827957	0.8333333333333334	0.5645161290322581	0.6873315363881403	10.307120323181152	20.0	0.7931034482758621	0.8125	0.7794117647058824	0.7885304659498208	0.7222222222222222	0.8548387096774194	0.7900452488687782	13.373670101165771	20.0	0.8017241379310345	0.7924528301886793	0.8095238095238095	0.8001792114695341	0.7777777777777778	0.8225806451612904	0.8005233644859813	18.820676803588867	20.0	0.7155172413793104	0.6842105263157895	0.7457627118644068
191	20.0	0.8	0.7636363636363637	0.8333333333333334	0.8006715506715507	0.8076923076923077	0.7936507936507936	0.7990274295266317	1.6131532192230225	20.0	0.7913043478260869	0.7258064516129032	0.8679245283018868	0.7977716727716728	0.8653846153846154	0.7301587301587301	0.7912885662431942	6.570261240005493	20.0	0.7391304347826086	0.6571428571428571	0.8666666666666667	0.7518315018315018	0.8846153846153846	0.6190476190476191	0.73816029143898	10.341045379638672	20.0	0.7652173913043478	0.7358490566037735	0.7903225806451613	0.7638888888888888	0.75	0.7777777777777778	0.7634285714285713	11.829468965530396	20.0	0.7652173913043478	0.7272727272727273	0.8	0.7655677655677655	0.7692307692307693	0.7619047619047619	0.7640756781399589	22.08002018928528	20.0	0.6695652173913044	0.6346153846153846	0.6984126984126984
192	20.0	0.808695652173913	0.7755102040816326	0.8333333333333334	0.804421768707483	0.7755102040816326	0.8333333333333334	0.804421768707483	1.594820499420166	20.0	0.8173913043478261	0.7592592592592593	0.8688524590163934	0.819882498453927	0.8367346938775511	0.803030303030303	0.8153810870728537	6.105573654174805	20.0	0.7739130434782608	0.6716417910447762	0.9166666666666666	0.7925170068027211	0.9183673469387755	0.6666666666666666	0.7738959467634603	10.908584833145142	20.0	0.7478260869565218	0.7083333333333334	0.7761194029850746	0.7408781694495981	0.6938775510204082	0.7878787878787878	0.7414929075265484	12.751737594604492	20.0	0.7913043478260869	0.7551020408163265	0.8181818181818182	0.7866419294990723	0.7551020408163265	0.8181818181818182	0.7866419294990723	20.022374391555786	20.0	0.7565217391304347	0.6842105263157895	0.8275862068965517
193	20.0	0.782608695652174	0.8333333333333334	0.7377049180327869	0.7855191256830601	0.7377049180327869	0.8333333333333334	0.782608695652174	1.5380864143371582	20.0	0.782608695652174	0.8214285714285714	0.7457627118644068	0.7844565877352763	0.7540983606557377	0.8148148148148148	0.7825429241358446	6.593703508377075	20.0	0.7478260869565218	0.75	0.7450980392156863	0.7452944748026715	0.7868852459016393	0.7037037037037037	0.745904761904762	10.115974426269531	20.0	0.7478260869565218	0.7962962962962963	0.7049180327868853	0.7506071645415908	0.7049180327868853	0.7962962962962963	0.7478260869565216	11.96636414527893	20.0	0.7739130434782608	0.8301886792452831	0.7258064516129032	0.7773224043715847	0.7213114754098361	0.8333333333333334	0.7738959467634603	18.333736896514893	20.0	0.8	0.796875	0.803921568627451
194	20.0	0.808695652173913	0.8461538461538461	0.7777777777777778	0.809134906231095	0.7586206896551724	0.8596491228070176	0.8083333333333333	1.5531728267669678	20.0	0.7478260869565218	0.7843137254901961	0.71875	0.7483363581367211	0.6896551724137931	0.8070175438596491	0.7471377663204186	6.5602874755859375	20.0	0.7043478260869566	0.7142857142857143	0.6949152542372882	0.7044767090139141	0.6896551724137931	0.7192982456140351	0.7043254688445251	10.427591562271118	20.0	0.7652173913043478	0.8297872340425532	0.7205882352941176	0.766031457955233	0.6724137931034483	0.8596491228070176	0.7634285714285713	11.491714477539062	20.0	0.7391304347826086	0.75	0.7288135593220338	0.7392619479733817	0.7241379310344828	0.7543859649122807	0.7391107078039928	20.616814374923706	20.0	0.7391304347826086	0.75	0.7288135593220338
195	20.0	0.8	0.8064516129032258	0.7924528301886793	0.7987249544626593	0.819672131147541	0.7777777777777778	0.7990274295266317	1.49159836769104	20.0	0.8173913043478261	0.8225806451612904	0.8113207547169812	0.8161809350333941	0.8360655737704918	0.7962962962962963	0.8165033052199682	6.295840501785278	20.0	0.7478260869565218	0.7424242424242424	0.7551020408163265	0.7442319368548878	0.8032786885245902	0.6851851851851852	0.7450500726244171	10.395599365234375	20.0	0.782608695652174	0.8103448275862069	0.7543859649122807	0.7833940497874924	0.7704918032786885	0.7962962962962963	0.7823453705806647	11.070323944091797	20.0	0.7652173913043478	0.7741935483870968	0.7547169811320755	0.76381299332119	0.7868852459016393	0.7407407407407407	0.764075678139959	18.49796748161316	20.0	0.6695652173913044	0.6825396825396826	0.6538461538461539
196	20.0	0.7391304347826086	0.7540983606557377	0.7222222222222222	0.73816029143898	0.7540983606557377	0.7222222222222222	0.73816029143898	1.8461530208587646	20.0	0.7913043478260869	0.8363636363636363	0.75	0.7937158469945356	0.7540983606557377	0.8333333333333334	0.7912885662431941	6.714978218078613	20.0	0.7043478260869566	0.7142857142857143	0.6923076923076923	0.7021857923497268	0.7377049180327869	0.6666666666666666	0.7025258673158856	9.542251825332642	20.0	0.7739130434782608	0.7868852459016393	0.7592592592592593	0.7730722525804493	0.7868852459016393	0.7592592592592593	0.7730722525804492	11.892173290252686	20.0	0.7565217391304347	0.7619047619047619	0.75	0.7545537340619308	0.7868852459016393	0.7222222222222222	0.7550213024954351	18.279916524887085	20.0	0.7043478260869566	0.7014925373134329	0.7083333333333334
197	20.0	0.7478260869565218	0.7307692307692307	0.7619047619047619	0.7455873402312843	0.7169811320754716	0.7741935483870968	0.7459047619047618	1.7917091846466064	20.0	0.7478260869565218	0.7142857142857143	0.7796610169491526	0.7483262325015216	0.7547169811320755	0.7419354838709677	0.7471377663204186	6.440087795257568	20.0	0.7565217391304347	0.676056338028169	0.8863636363636364	0.7673463177115034	0.9056603773584906	0.6290322580645161	0.7550213024954351	9.463821172714233	20.0	0.7043478260869566	0.6610169491525424	0.75	0.7066342057212416	0.7358490566037735	0.6774193548387096	0.7041464891041163	11.68562388420105	20.0	0.7565217391304347	0.7450980392156863	0.765625	0.7536518563603165	0.7169811320754716	0.7903225806451613	0.7542735042735043	22.013580560684204	20.0	0.7043478260869566	0.6727272727272727	0.7333333333333333
198	20.0	0.7478260869565218	0.7586206896551724	0.7368421052631579	0.7478813559322034	0.7457627118644068	0.75	0.7477497919975795	1.630239486694336	20.0	0.7652173913043478	0.7857142857142857	0.7457627118644068	0.7657384987893463	0.7457627118644068	0.7857142857142857	0.7652173913043477	6.590059757232666	20.0	0.808695652173913	0.7605633802816901	0.8863636363636364	0.8058414043583535	0.9152542372881356	0.6964285714285714	0.8053846153846154	11.541629076004028	20.0	0.6869565217391305	0.6949152542372882	0.6785714285714286	0.6867433414043584	0.6949152542372882	0.6785714285714286	0.6867433414043584	11.734729051589966	20.0	0.6956521739130435	0.6935483870967742	0.6981132075471698	0.6947639225181598	0.7288135593220338	0.6607142857142857	0.69482144211085	17.616346836090088	20.0	0.7478260869565218	0.7586206896551724	0.7368421052631579
199	20.0	0.7739130434782608	0.8461538461538461	0.7142857142857143	0.7793670115642118	0.7096774193548387	0.8490566037735849	0.7738959467634604	1.5960733890533447	20.0	0.7391304347826086	0.7857142857142857	0.6949152542372882	0.7416311625076081	0.7096774193548387	0.7735849056603774	0.7389527845036321	6.740155935287476	20.0	0.7913043478260869	0.7878787878787878	0.7959183673469388	0.7872793670115642	0.8387096774193549	0.7358490566037735	0.7886029411764706	10.341842412948608	20.0	0.6695652173913044	0.7	0.6363636363636364	0.6688983566646378	0.6774193548387096	0.660377358490566	0.6683363691560412	10.564249038696289	20.0	0.7043478260869566	0.7413793103448276	0.6666666666666666	0.705264759586123	0.6935483870967742	0.7169811320754716	0.7037878787878789	19.35433030128479	20.0	0.7391304347826086	0.7580645161290323	0.7169811320754716
200	21.0	0.7672413793103449	0.7288135593220338	0.8070175438596491	0.769115890083632	0.7962962962962963	0.7419354838709677	0.7670855953000669	1.6877787113189697	21.0	0.8189655172413793	0.7894736842105263	0.847457627118644	0.8198924731182795	0.8333333333333334	0.8064516129032258	0.8186285459012732	6.717663288116455	21.0	0.7413793103448276	0.6818181818181818	0.82	0.7473118279569892	0.8333333333333334	0.6612903225806451	0.7410714285714286	10.446265459060669	21.0	0.7844827586206896	0.7543859649122807	0.8135593220338984	0.7852449223416965	0.7962962962962963	0.7741935483870968	0.7840816022634205	12.77890682220459	21.0	0.8189655172413793	0.7796610169491526	0.8596491228070176	0.8210872162485066	0.8518518518518519	0.7903225806451613	0.8188443519000521	20.64367437362671	21.0	0.7327586206896551	0.6716417910447762	0.8163265306122449
201	21.0	0.7652173913043478	0.7358490566037735	0.7903225806451613	0.7638888888888888	0.75	0.7777777777777778	0.7634285714285713	1.6606032848358154	21.0	0.782608695652174	0.7213114754098361	0.8518518518518519	0.7881562881562881	0.8461538461538461	0.7301587301587301	0.7825429241358445	6.879009485244751	21.0	0.7304347826086957	0.647887323943662	0.8636363636363636	0.7438949938949939	0.8846153846153846	0.6031746031746031	0.7291239267532862	11.108352899551392	21.0	0.7478260869565218	0.6949152542372882	0.8035714285714286	0.7513736263736264	0.7884615384615384	0.7142857142857143	0.747520629873571	11.726485013961792	21.0	0.7478260869565218	0.6949152542372882	0.8035714285714286	0.7513736263736264	0.7884615384615384	0.7142857142857143	0.747520629873571	18.987460136413574	21.0	0.6869565217391305	0.6666666666666666	0.7014925373134329
202	21.0	0.808695652173913	0.7872340425531915	0.8235294117647058	0.8017934446505874	0.7551020408163265	0.8484848484848485	0.8033271144278606	1.6320667266845703	21.0	0.7913043478260869	0.7192982456140351	0.8620689655172413	0.7971552257266543	0.8367346938775511	0.7575757575757576	0.7900182592818015	7.1894872188568115	21.0	0.808695652173913	0.7076923076923077	0.94	0.8254483611626469	0.9387755102040817	0.7121212121212122	0.8086811857229281	10.833807945251465	21.0	0.7913043478260869	0.7777777777777778	0.8	0.7813852813852814	0.7142857142857143	0.8484848484848485	0.7841051314142679	12.365300416946411	21.0	0.782608695652174	0.74	0.8153846153846154	0.7790661719233147	0.7551020408163265	0.803030303030303	0.7783175264091294	20.55083417892456	21.0	0.7217391304347827	0.6491228070175439	0.7931034482758621
203	21.0	0.7478260869565218	0.7962962962962963	0.7049180327868853	0.7506071645415908	0.7049180327868853	0.7962962962962963	0.7478260869565216	1.5469393730163574	21.0	0.782608695652174	0.8333333333333334	0.7377049180327869	0.7855191256830601	0.7377049180327869	0.8333333333333334	0.782608695652174	6.660037279129028	21.0	0.7478260869565218	0.75	0.7450980392156863	0.7452944748026715	0.7868852459016393	0.7037037037037037	0.745904761904762	10.54062271118164	21.0	0.7304347826086957	0.7586206896551724	0.7017543859649122	0.7310261080752884	0.7213114754098361	0.7407407407407407	0.7301082595200241	12.252652883529663	21.0	0.7043478260869566	0.7547169811320755	0.6612903225806451	0.7074984820886461	0.6557377049180327	0.7592592592592593	0.7043254688445251	19.909257173538208	21.0	0.7652173913043478	0.7428571428571429	0.8
204	21.0	0.782608695652174	0.8113207547169812	0.7580645161290323	0.7829703569267998	0.7413793103448276	0.8245614035087719	0.7823453705806647	1.6558842658996582	21.0	0.7913043478260869	0.84	0.7538461538461538	0.7918935269207501	0.7241379310344828	0.8596491228070176	0.7905282331511839	6.69350004196167	21.0	0.7130434782608696	0.711864406779661	0.7142857142857143	0.7129461584996974	0.7241379310344828	0.7017543859649122	0.7129566598593147	9.900973796844482	21.0	0.7304347826086957	0.7454545454545455	0.7166666666666667	0.7306412583182094	0.7068965517241379	0.7543859649122807	0.7303532259284471	11.662418127059937	21.0	0.7739130434782608	0.8076923076923077	0.746031746031746	0.7743496672716274	0.7241379310344828	0.8245614035087719	0.7734848484848484	19.022641897201538	21.0	0.7217391304347827	0.7321428571428571	0.711864406779661
205	21.0	0.8173913043478261	0.8125	0.8235294117647058	0.8151183970856102	0.8524590163934426	0.7777777777777778	0.8159999999999998	1.5361664295196533	21.0	0.7565217391304347	0.7391304347826086	0.782608695652174	0.7513661202185793	0.8360655737704918	0.6666666666666666	0.7523076923076923	6.416619777679443	21.0	0.7652173913043478	0.7361111111111112	0.813953488372093	0.7585003035822708	0.8688524590163934	0.6481481481481481	0.7593209828695451	10.562994241714478	21.0	0.8	0.8392857142857143	0.7627118644067796	0.8019125683060109	0.7704918032786885	0.8333333333333334	0.799939490204977	11.090390920639038	21.0	0.7478260869565218	0.7666666666666667	0.7272727272727273	0.7474195506982392	0.7540983606557377	0.7407407407407407	0.7471377663204186	18.408027172088623	21.0	0.6782608695652174	0.7	0.6545454545454545
206	21.0	0.8	0.796875	0.803921568627451	0.7976624165148756	0.8360655737704918	0.7592592592592593	0.7984761904761905	1.9064483642578125	21.0	0.7652173913043478	0.8035714285714286	0.7288135593220338	0.7670006071645417	0.7377049180327869	0.7962962962962963	0.7651463580667122	6.927603244781494	21.0	0.6956521739130435	0.696969696969697	0.6938775510204082	0.6918639951426837	0.7540983606557377	0.6296296296296297	0.6923018117880896	10.579618215560913	21.0	0.7565217391304347	0.7704918032786885	0.7407407407407407	0.7556162720097146	0.7704918032786885	0.7407407407407407	0.7556162720097146	12.712810754776001	21.0	0.7739130434782608	0.7966101694915254	0.75	0.7741347905282332	0.7704918032786885	0.7777777777777778	0.7734848484848486	22.369075059890747	21.0	0.7130434782608696	0.7121212121212122	0.7142857142857143
207	21.0	0.7739130434782608	0.7454545454545455	0.8	0.7738892270237371	0.7735849056603774	0.7741935483870968	0.7730722525804493	1.72163724899292	21.0	0.7304347826086957	0.7037037037037037	0.7540983606557377	0.7294583079732198	0.7169811320754716	0.7419354838709677	0.7291239267532863	6.867650747299194	21.0	0.7217391304347827	0.6438356164383562	0.8571428571428571	0.7337188070602556	0.8867924528301887	0.5806451612903226	0.7191697191697192	10.664265871047974	21.0	0.7130434782608696	0.6785714285714286	0.7457627118644068	0.7133292757151553	0.7169811320754716	0.7096774193548387	0.7122602168473728	12.757649898529053	21.0	0.7739130434782608	0.7647058823529411	0.78125	0.7711503347534996	0.7358490566037735	0.8064516129032258	0.7718253968253967	20.134544849395752	21.0	0.6956521739130435	0.6730769230769231	0.7142857142857143
208	21.0	0.7304347826086957	0.7333333333333333	0.7272727272727273	0.7300242130750605	0.7457627118644068	0.7142857142857143	0.7301082595200243	1.4991586208343506	21.0	0.7391304347826086	0.7636363636363637	0.7166666666666667	0.739860774818402	0.711864406779661	0.7678571428571429	0.7391107078039928	6.509562969207764	21.0	0.782608695652174	0.7361111111111112	0.8604651162790697	0.7795096852300243	0.8983050847457628	0.6607142857142857	0.7783175264091295	11.279144763946533	21.0	0.7130434782608696	0.7166666666666667	0.7090909090909091	0.7126210653753027	0.7288135593220338	0.6964285714285714	0.7126958891664774	11.293663740158081	21.0	0.7304347826086957	0.7333333333333333	0.7272727272727273	0.7300242130750605	0.7457627118644068	0.7142857142857143	0.7301082595200243	18.120649099349976	21.0	0.7391304347826086	0.7636363636363637	0.7166666666666667
209	21.0	0.7739130434782608	0.8333333333333334	0.7213114754098361	0.7779975654290932	0.7258064516129032	0.8301886792452831	0.7738959467634603	1.5649974346160889	21.0	0.7304347826086957	0.7627118644067796	0.6964285714285714	0.7308277541083383	0.7258064516129032	0.7358490566037735	0.7296989915838956	6.692989349365234	21.0	0.8	0.782608695652174	0.8260869565217391	0.7939744370054778	0.8709677419354839	0.7169811320754716	0.7960521242963992	10.772969722747803	21.0	0.7304347826086957	0.7384615384615385	0.72	0.7267194157029824	0.7741935483870968	0.6792452830188679	0.7274673190123079	11.442332029342651	21.0	0.6869565217391305	0.7166666666666667	0.6545454545454545	0.6863968350578211	0.6935483870967742	0.6792452830188679	0.6857923497267759	23.391289234161377	21.0	0.7739130434782608	0.8103448275862069	0.7368421052631579
210	22.0	0.7672413793103449	0.7288135593220338	0.8070175438596491	0.769115890083632	0.7962962962962963	0.7419354838709677	0.7670855953000669	1.688894271850586	22.0	0.8189655172413793	0.7894736842105263	0.847457627118644	0.8198924731182795	0.8333333333333334	0.8064516129032258	0.8186285459012732	7.051916837692261	22.0	0.75	0.6865671641791045	0.8367346938775511	0.7565710872162486	0.8518518518518519	0.6612903225806451	0.7495346586255677	10.665898323059082	22.0	0.7758620689655172	0.7592592592592593	0.7903225806451613	0.7747909199522103	0.7592592592592593	0.7903225806451613	0.7747909199522103	12.476667165756226	22.0	0.7672413793103449	0.7213114754098361	0.8181818181818182	0.770310633213859	0.8148148148148148	0.7258064516129032	0.7672240802675585	19.150471210479736	22.0	0.7155172413793104	0.6779661016949152	0.7543859649122807
211	22.0	0.7565217391304347	0.7142857142857143	0.7966101694915254	0.7576312576312576	0.7692307692307693	0.746031746031746	0.7556162720097146	1.6526174545288086	22.0	0.8	0.7457627118644068	0.8571428571428571	0.8040293040293041	0.8461538461538461	0.7619047619047619	0.7997577409342116	6.802846431732178	22.0	0.7391304347826086	0.6571428571428571	0.8666666666666667	0.7518315018315018	0.8846153846153846	0.6190476190476191	0.73816029143898	10.789334535598755	22.0	0.7652173913043478	0.7192982456140351	0.8103448275862069	0.7672466422466422	0.7884615384615384	0.746031746031746	0.7645765410569414	11.929710626602173	22.0	0.7565217391304347	0.7142857142857143	0.7966101694915254	0.7576312576312576	0.7692307692307693	0.746031746031746	0.7556162720097146	19.157591581344604	22.0	0.6695652173913044	0.64	0.6923076923076923
212	22.0	0.7739130434782608	0.7254901960784313	0.8125	0.7714904143475572	0.7551020408163265	0.7878787878787878	0.77	1.6160871982574463	22.0	0.8260869565217391	0.7735849056603774	0.8709677419354839	0.8274582560296846	0.8367346938775511	0.8181818181818182	0.8238357843137255	6.680165529251099	22.0	0.808695652173913	0.7076923076923077	0.94	0.8254483611626469	0.9387755102040817	0.7121212121212122	0.8086811857229281	10.777129411697388	22.0	0.7913043478260869	0.7777777777777778	0.8	0.7813852813852814	0.7142857142857143	0.8484848484848485	0.7841051314142679	12.195306539535522	22.0	0.8173913043478261	0.78	0.8461538461538461	0.814625850340136	0.7959183673469388	0.8333333333333334	0.8137867221836688	22.889261722564697	22.0	0.7652173913043478	0.6896551724137931	0.8421052631578947
213	22.0	0.7913043478260869	0.8490566037735849	0.7419354838709677	0.7947783849423193	0.7377049180327869	0.8518518518518519	0.7912885662431942	1.483116626739502	22.0	0.7652173913043478	0.8035714285714286	0.7288135593220338	0.7670006071645417	0.7377049180327869	0.7962962962962963	0.7651463580667122	6.409860372543335	22.0	0.7217391304347827	0.7164179104477612	0.7291666666666666	0.7175166970248937	0.7868852459016393	0.6481481481481481	0.7181372549019608	9.45622444152832	22.0	0.7478260869565218	0.7857142857142857	0.711864406779661	0.7495446265938069	0.7213114754098361	0.7777777777777778	0.7477497919975796	11.614092111587524	22.0	0.7565217391304347	0.7796610169491526	0.7321428571428571	0.7566788099574985	0.7540983606557377	0.7592592592592593	0.7560606060606061	17.31581950187683	22.0	0.782608695652174	0.7727272727272727	0.7959183673469388
214	22.0	0.782608695652174	0.8113207547169812	0.7580645161290323	0.7829703569267998	0.7413793103448276	0.8245614035087719	0.7823453705806647	1.5784127712249756	22.0	0.7565217391304347	0.8260869565217391	0.7101449275362319	0.7574107683000605	0.6551724137931034	0.8596491228070176	0.7542735042735043	6.601217746734619	22.0	0.7130434782608696	0.7049180327868853	0.7222222222222222	0.7127949183303086	0.7413793103448276	0.6842105263157895	0.7126958891664774	8.997007608413696	22.0	0.7565217391304347	0.7884615384615384	0.7301587301587301	0.7569570477918934	0.7068965517241379	0.8070175438596491	0.7560606060606061	11.450897932052612	22.0	0.7391304347826086	0.7413793103448276	0.7368421052631579	0.7391107078039927	0.7413793103448276	0.7368421052631579	0.7391107078039927	18.472303867340088	22.0	0.7478260869565218	0.7636363636363637	0.7333333333333333
215	22.0	0.7739130434782608	0.7966101694915254	0.75	0.7741347905282332	0.7704918032786885	0.7777777777777778	0.7734848484848486	1.5247504711151123	22.0	0.782608695652174	0.7571428571428571	0.8222222222222222	0.7770188221007893	0.8688524590163934	0.6851851851851852	0.7783175264091295	6.440050840377808	22.0	0.7652173913043478	0.765625	0.7647058823529411	0.7627504553734061	0.8032786885245902	0.7222222222222222	0.7634285714285713	9.486650705337524	22.0	0.782608695652174	0.8103448275862069	0.7543859649122807	0.7833940497874924	0.7704918032786885	0.7962962962962963	0.7823453705806647	9.964255571365356	22.0	0.7652173913043478	0.7575757575757576	0.7755102040816326	0.7616879174256224	0.819672131147541	0.7037037037037037	0.7626328262365263	22.85686159133911	22.0	0.6782608695652174	0.6935483870967742	0.660377358490566
216	22.0	0.7739130434782608	0.7966101694915254	0.75	0.7741347905282332	0.7704918032786885	0.7777777777777778	0.7734848484848486	1.886723279953003	22.0	0.7913043478260869	0.8363636363636363	0.75	0.7937158469945356	0.7540983606557377	0.8333333333333334	0.7912885662431941	6.4796202182769775	22.0	0.6956521739130435	0.703125	0.6862745098039216	0.6929265330904675	0.7377049180327869	0.6481481481481481	0.6933333333333334	10.20319414138794	22.0	0.7913043478260869	0.8032786885245902	0.7777777777777778	0.790528233151184	0.8032786885245902	0.7777777777777778	0.790528233151184	11.101022958755493	22.0	0.782608695652174	0.7903225806451613	0.7735849056603774	0.7812689738919247	0.8032786885245902	0.7592592592592593	0.7815515538332953	19.412896156311035	22.0	0.7130434782608696	0.7121212121212122	0.7142857142857143
217	22.0	0.7478260869565218	0.7307692307692307	0.7619047619047619	0.7455873402312843	0.7169811320754716	0.7741935483870968	0.7459047619047618	1.6458740234375	22.0	0.7217391304347827	0.6842105263157895	0.7586206896551724	0.7227632379793061	0.7358490566037735	0.7096774193548387	0.7212121212121212	5.842015027999878	22.0	0.7565217391304347	0.676056338028169	0.8863636363636364	0.7673463177115034	0.9056603773584906	0.6290322580645161	0.7550213024954351	10.865049362182617	22.0	0.6956521739130435	0.6551724137931034	0.7368421052631579	0.6972002434570906	0.7169811320754716	0.6774193548387096	0.6952835188129305	11.700766563415527	22.0	0.7913043478260869	0.7735849056603774	0.8064516129032258	0.7900182592818016	0.7735849056603774	0.8064516129032258	0.7900182592818017	19.912622213363647	22.0	0.6695652173913044	0.6415094339622641	0.6935483870967742
218	22.0	0.7217391304347827	0.7288135593220338	0.7142857142857143	0.7215496368038741	0.7288135593220338	0.7142857142857143	0.7215496368038741	1.515925645828247	22.0	0.7565217391304347	0.7719298245614035	0.7413793103448276	0.7568099273607749	0.7457627118644068	0.7678571428571429	0.7565033272837265	5.80972695350647	22.0	0.7913043478260869	0.7536231884057971	0.8478260869565217	0.7888922518159807	0.8813559322033898	0.6964285714285714	0.7886029411764706	10.83915400505066	22.0	0.7130434782608696	0.7241379310344828	0.7017543859649122	0.7130750605326877	0.711864406779661	0.7142857142857143	0.7129566598593147	11.035736083984375	22.0	0.7043478260869566	0.711864406779661	0.6964285714285714	0.7041464891041163	0.711864406779661	0.6964285714285714	0.7041464891041163	21.06373906135559	22.0	0.7304347826086957	0.75	0.711864406779661
219	22.0	0.782608695652174	0.8363636363636363	0.7333333333333333	0.7860620815581254	0.7419354838709677	0.8301886792452831	0.7825429241358445	1.552809238433838	22.0	0.7478260869565218	0.8	0.7	0.751065124771759	0.7096774193548387	0.7924528301886793	0.7477497919975795	5.695945739746094	22.0	0.8	0.7910447761194029	0.8125	0.7953438831405965	0.8548387096774194	0.7358490566037735	0.7969913270396807	10.01515007019043	22.0	0.7130434782608696	0.7377049180327869	0.6851851851851852	0.7119598295800365	0.7258064516129032	0.6981132075471698	0.7116480510599499	9.742314338684082	22.0	0.7130434782608696	0.7377049180327869	0.6851851851851852	0.7119598295800365	0.7258064516129032	0.6981132075471698	0.7116480510599499	17.29708433151245	22.0	0.6695652173913044	0.6935483870967742	0.6415094339622641
220	23.0	0.7413793103448276	0.7142857142857143	0.7666666666666667	0.7413381123058542	0.7407407407407407	0.7419354838709677	0.7406855439642325	1.6671528816223145	23.0	0.7844827586206896	0.7457627118644068	0.8245614035087719	0.7864396654719235	0.8148148148148148	0.7580645161290323	0.7843385141667286	6.633140325546265	23.0	0.7672413793103449	0.7142857142857143	0.8301886792452831	0.771505376344086	0.8333333333333334	0.7096774193548387	0.7672240802675585	10.793285608291626	23.0	0.7931034482758621	0.7678571428571429	0.8166666666666667	0.7933094384707288	0.7962962962962963	0.7903225806451613	0.7925484351713861	11.441499710083008	23.0	0.7586206896551724	0.7321428571428571	0.7833333333333333	0.7586618876941458	0.7592592592592593	0.7580645161290323	0.7579731743666169	20.40562891960144	23.0	0.7327586206896551	0.676923076923077	0.803921568627451
221	23.0	0.7565217391304347	0.7222222222222222	0.7868852459016393	0.7559523809523809	0.75	0.7619047619047619	0.7550213024954351	1.6544721126556396	23.0	0.808695652173913	0.7586206896551724	0.8596491228070176	0.811965811965812	0.8461538461538461	0.7777777777777778	0.8083333333333333	6.6639275550842285	23.0	0.7304347826086957	0.647887323943662	0.8636363636363636	0.7438949938949939	0.8846153846153846	0.6031746031746031	0.7291239267532862	9.439148426055908	23.0	0.782608695652174	0.7547169811320755	0.8064516129032258	0.7814407814407814	0.7692307692307693	0.7936507936507936	0.7809523809523808	12.220288038253784	23.0	0.7391304347826086	0.6833333333333333	0.8	0.7434371184371185	0.7884615384615384	0.6984126984126984	0.7389527845036319	22.183078050613403	23.0	0.6782608695652174	0.6470588235294118	0.703125
222	23.0	0.7913043478260869	0.7358490566037735	0.8387096774193549	0.7918985776128633	0.7959183673469388	0.7878787878787878	0.7886029411764706	1.6290562152862549	23.0	0.8	0.7321428571428571	0.864406779661017	0.8047309833024119	0.8367346938775511	0.7727272727272727	0.7984761904761905	6.3217809200286865	23.0	0.7913043478260869	0.6811594202898551	0.9565217391304348	0.8129251700680271	0.9591836734693877	0.6666666666666666	0.7911622276029056	11.369337320327759	23.0	0.7652173913043478	0.7291666666666666	0.7910447761194029	0.7586580086580086	0.7142857142857143	0.803030303030303	0.7593209828695451	12.869561433792114	23.0	0.782608695652174	0.7307692307692307	0.8253968253968254	0.7816944959802102	0.7755102040816326	0.7878787878787878	0.7793383989561746	19.81133723258972	23.0	0.7130434782608696	0.6538461538461539	0.7619047619047619
223	23.0	0.8	0.88	0.7384615384615385	0.8051001821493624	0.7213114754098361	0.8888888888888888	0.7997577409342116	1.4612922668457031	23.0	0.8173913043478261	0.8448275862068966	0.7894736842105263	0.8183060109289617	0.8032786885245902	0.8333333333333334	0.8171701112877584	5.647733449935913	23.0	0.7565217391304347	0.7619047619047619	0.75	0.7545537340619308	0.7868852459016393	0.7222222222222222	0.7550213024954351	10.060897588729858	23.0	0.7217391304347827	0.7636363636363637	0.6833333333333333	0.7238919247115969	0.6885245901639344	0.7592592592592593	0.7217180883242589	11.926431655883789	23.0	0.7478260869565218	0.7857142857142857	0.711864406779661	0.7495446265938069	0.7213114754098361	0.7777777777777778	0.7477497919975796	18.575886487960815	23.0	0.7478260869565218	0.7580645161290323	0.7358490566037735
224	23.0	0.782608695652174	0.8113207547169812	0.7580645161290323	0.7829703569267998	0.7413793103448276	0.8245614035087719	0.7823453705806647	1.5864849090576172	23.0	0.7652173913043478	0.8444444444444444	0.7142857142857143	0.7661826981246218	0.6551724137931034	0.8771929824561403	0.7626328262365263	5.6031599044799805	23.0	0.7217391304347827	0.7321428571428571	0.711864406779661	0.7218693284936479	0.7068965517241379	0.7368421052631579	0.7217180883242589	9.679442167282104	23.0	0.7478260869565218	0.7636363636363637	0.7333333333333333	0.7480338777979432	0.7241379310344828	0.7719298245614035	0.7477497919975797	10.319764614105225	23.0	0.7304347826086957	0.7213114754098361	0.7407407407407407	0.7301875378100423	0.7586206896551724	0.7017543859649122	0.7301082595200241	23.183891773223877	23.0	0.7391304347826086	0.7413793103448276	0.7368421052631579
225	23.0	0.808695652173913	0.8305084745762712	0.7857142857142857	0.8090467516697024	0.8032786885245902	0.8148148148148148	0.8083333333333333	1.5041687488555908	23.0	0.7652173913043478	0.765625	0.7647058823529411	0.7627504553734061	0.8032786885245902	0.7222222222222222	0.7634285714285713	5.881688356399536	23.0	0.7217391304347827	0.7101449275362319	0.7391304347826086	0.7164541590771099	0.8032786885245902	0.6296296296296297	0.716923076923077	11.016148567199707	23.0	0.8	0.8166666666666667	0.7818181818181819	0.7997874924104432	0.8032786885245902	0.7962962962962963	0.7994540905299872	11.360491514205933	23.0	0.7478260869565218	0.7666666666666667	0.7272727272727273	0.7474195506982392	0.7540983606557377	0.7407407407407407	0.7471377663204186	20.545589685440063	23.0	0.6782608695652174	0.7068965517241379	0.6491228070175439
226	23.0	0.7565217391304347	0.7619047619047619	0.75	0.7545537340619308	0.7868852459016393	0.7222222222222222	0.7550213024954351	1.938849687576294	23.0	0.7913043478260869	0.8363636363636363	0.75	0.7937158469945356	0.7540983606557377	0.8333333333333334	0.7912885662431941	6.942991733551025	23.0	0.6782608695652174	0.6875	0.6666666666666666	0.6754705525197329	0.7213114754098361	0.6296296296296297	0.6758095238095239	11.808592081069946	23.0	0.7478260869565218	0.7580645161290323	0.7358490566037735	0.7463570127504553	0.7704918032786885	0.7222222222222222	0.7465998024466226	12.179279804229736	23.0	0.7478260869565218	0.7580645161290323	0.7358490566037735	0.7463570127504553	0.7704918032786885	0.7222222222222222	0.7465998024466226	19.802326917648315	23.0	0.6956521739130435	0.703125	0.6862745098039216
227	23.0	0.7304347826086957	0.7037037037037037	0.7540983606557377	0.7294583079732198	0.7169811320754716	0.7419354838709677	0.7291239267532863	1.6501479148864746	23.0	0.7304347826086957	0.6896551724137931	0.7719298245614035	0.7321972002434571	0.7547169811320755	0.7096774193548387	0.7301082595200242	6.463907957077026	23.0	0.7565217391304347	0.676056338028169	0.8863636363636364	0.7673463177115034	0.9056603773584906	0.6290322580645161	0.7550213024954351	10.907799482345581	23.0	0.6956521739130435	0.6551724137931034	0.7368421052631579	0.6972002434570906	0.7169811320754716	0.6774193548387096	0.6952835188129305	12.019429206848145	23.0	0.782608695652174	0.7692307692307693	0.7936507936507936	0.7805842970176506	0.7547169811320755	0.8064516129032258	0.7809523809523808	20.301107168197632	23.0	0.6869565217391305	0.660377358490566	0.7096774193548387
228	23.0	0.6869565217391305	0.6825396825396826	0.6923076923076923	0.6858353510895884	0.7288135593220338	0.6428571428571429	0.6857923497267759	1.4988985061645508	23.0	0.7478260869565218	0.7586206896551724	0.7368421052631579	0.7478813559322034	0.7457627118644068	0.75	0.7477497919975795	5.699944496154785	23.0	0.7913043478260869	0.7464788732394366	0.8636363636363636	0.7884382566585957	0.8983050847457628	0.6785714285714286	0.7876923076923077	11.363335609436035	23.0	0.7217391304347827	0.7288135593220338	0.7142857142857143	0.7215496368038741	0.7288135593220338	0.7142857142857143	0.7215496368038741	11.296828985214233	23.0	0.7478260869565218	0.75	0.7454545454545455	0.7474273607748183	0.7627118644067796	0.7321428571428571	0.747520629873571	19.501062154769897	23.0	0.7739130434782608	0.8113207547169812	0.7419354838709677
229	23.0	0.7391304347826086	0.7962962962962963	0.6885245901639344	0.7430006086427268	0.6935483870967742	0.7924528301886793	0.7391107078039927	1.5209918022155762	23.0	0.8	0.8545454545454545	0.75	0.8035605599513086	0.7580645161290323	0.8490566037735849	0.7999394902049769	5.725801944732666	23.0	0.7913043478260869	0.7638888888888888	0.8372093023255814	0.7831710286062081	0.8870967741935484	0.6792452830188679	0.7854477611940298	11.196352481842041	23.0	0.6608695652173913	0.6825396825396826	0.6346153846153846	0.6580949482653682	0.6935483870967742	0.6226415094339622	0.6582857142857143	11.233821630477905	23.0	0.7130434782608696	0.7377049180327869	0.6851851851851852	0.7119598295800365	0.7258064516129032	0.6981132075471698	0.7116480510599499	20.5538432598114	23.0	0.7217391304347827	0.7419354838709677	0.6981132075471698
230	24.0	0.7155172413793104	0.6981132075471698	0.7301587301587301	0.7135603345280765	0.6851851851851852	0.7419354838709677	0.7137943925233645	1.6972851753234863	24.0	0.7672413793103449	0.7368421052631579	0.7966101694915254	0.7679211469534051	0.7777777777777778	0.7580645161290323	0.766808130444494	7.200628757476807	24.0	0.7758620689655172	0.7121212121212122	0.86	0.7819593787335724	0.8703703703703703	0.6935483870967742	0.775595238095238	11.077890157699585	24.0	0.8103448275862069	0.82	0.803030303030303	0.8070489844683393	0.7592592592592593	0.8548387096774194	0.8082932692307692	12.971294641494751	24.0	0.7758620689655172	0.7333333333333333	0.8214285714285714	0.7783751493428912	0.8148148148148148	0.7419354838709677	0.775795420755278	24.390098810195923	24.0	0.7327586206896551	0.6716417910447762	0.8163265306122449
231	24.0	0.7739130434782608	0.7407407407407407	0.8032786885245902	0.7735042735042735	0.7692307692307693	0.7777777777777778	0.7725197808886184	1.6617908477783203	24.0	0.7739130434782608	0.7241379310344828	0.8245614035087719	0.7768620268620269	0.8076923076923077	0.746031746031746	0.7734848484848484	6.5374062061309814	24.0	0.7565217391304347	0.6764705882352942	0.8723404255319149	0.7677045177045176	0.8846153846153846	0.6507936507936508	0.7560606060606061	11.17160153388977	24.0	0.782608695652174	0.7547169811320755	0.8064516129032258	0.7814407814407814	0.7692307692307693	0.7936507936507936	0.7809523809523808	11.967119216918945	24.0	0.782608695652174	0.7213114754098361	0.8518518518518519	0.7881562881562881	0.8461538461538461	0.7301587301587301	0.7825429241358445	18.36077880859375	24.0	0.6869565217391305	0.6538461538461539	0.7142857142857143
232	24.0	0.782608695652174	0.7307692307692307	0.8253968253968254	0.7816944959802102	0.7755102040816326	0.7878787878787878	0.7793383989561746	1.648303508758545	24.0	0.808695652173913	0.7547169811320755	0.8548387096774194	0.809678416821274	0.8163265306122449	0.803030303030303	0.8062193627450981	6.722916603088379	24.0	0.7913043478260869	0.6865671641791045	0.9375	0.8102968460111317	0.9387755102040817	0.6818181818181818	0.7912885662431943	10.944471836090088	24.0	0.782608695652174	0.7608695652173914	0.7971014492753623	0.7738095238095238	0.7142857142857143	0.8333333333333334	0.7758284600389864	13.057479858398438	24.0	0.8260869565217391	0.7959183673469388	0.8484848484848485	0.8222016079158936	0.7959183673469388	0.8484848484848485	0.8222016079158937	20.29362964630127	24.0	0.7391304347826086	0.6792452830188679	0.7903225806451613
233	24.0	0.7913043478260869	0.8936170212765957	0.7205882352941176	0.7979659987856709	0.6885245901639344	0.9074074074074074	0.7905282331511838	1.5965039730072021	24.0	0.7913043478260869	0.8363636363636363	0.75	0.7937158469945356	0.7540983606557377	0.8333333333333334	0.7912885662431941	6.676040410995483	24.0	0.7304347826086957	0.7272727272727273	0.7346938775510204	0.7267759562841529	0.7868852459016393	0.6666666666666666	0.727467319012308	10.777517795562744	24.0	0.7130434782608696	0.75	0.6779661016949152	0.7146326654523376	0.6885245901639344	0.7407407407407407	0.7129566598593147	13.068868160247803	24.0	0.7217391304347827	0.7735849056603774	0.6774193548387096	0.7249544626593807	0.6721311475409836	0.7777777777777778	0.7217180883242589	21.404884338378906	24.0	0.782608695652174	0.78125	0.7843137254901961
234	24.0	0.7739130434782608	0.7962962962962963	0.7540983606557377	0.7741984271022384	0.7413793103448276	0.8070175438596491	0.7737590799031477	1.5772881507873535	24.0	0.7652173913043478	0.8297872340425532	0.7205882352941176	0.766031457955233	0.6724137931034483	0.8596491228070176	0.7634285714285713	6.561708211898804	24.0	0.7130434782608696	0.711864406779661	0.7142857142857143	0.7129461584996974	0.7241379310344828	0.7017543859649122	0.7129566598593147	10.999706268310547	24.0	0.7304347826086957	0.7647058823529411	0.703125	0.7309437386569873	0.6724137931034483	0.7894736842105263	0.7296989915838956	12.540234327316284	24.0	0.7130434782608696	0.7358490566037735	0.6935483870967742	0.7133998790078645	0.6724137931034483	0.7543859649122807	0.7126958891664774	18.801074743270874	24.0	0.7391304347826086	0.75	0.7288135593220338
235	24.0	0.7913043478260869	0.8032786885245902	0.7777777777777778	0.790528233151184	0.8032786885245902	0.7777777777777778	0.790528233151184	1.536806344985962	24.0	0.7739130434782608	0.7777777777777778	0.7692307692307693	0.7720097146326654	0.8032786885245902	0.7407407407407407	0.7725197808886184	6.477379083633423	24.0	0.7478260869565218	0.7352941176470589	0.7659574468085106	0.7431693989071038	0.819672131147541	0.6666666666666666	0.7440325427891625	10.986160039901733	24.0	0.7913043478260869	0.8135593220338984	0.7678571428571429	0.7915907710989678	0.7868852459016393	0.7962962962962963	0.790909090909091	11.452264308929443	24.0	0.7652173913043478	0.7741935483870968	0.7547169811320755	0.76381299332119	0.7868852459016393	0.7407407407407407	0.764075678139959	18.736424922943115	24.0	0.6956521739130435	0.7166666666666667	0.6727272727272727
236	24.0	0.8173913043478261	0.8125	0.8235294117647058	0.8151183970856102	0.8524590163934426	0.7777777777777778	0.8159999999999998	1.8898975849151611	24.0	0.808695652173913	0.8545454545454545	0.7666666666666667	0.8111718275652702	0.7704918032786885	0.8518518518518519	0.808681185722928	7.0957701206207275	24.0	0.7043478260869566	0.7076923076923077	0.7	0.7011232544019429	0.7540983606557377	0.6481481481481481	0.7016178266178266	10.263319253921509	24.0	0.7652173913043478	0.7741935483870968	0.7547169811320755	0.76381299332119	0.7868852459016393	0.7407407407407407	0.764075678139959	13.07107400894165	24.0	0.7565217391304347	0.7704918032786885	0.7407407407407407	0.7556162720097146	0.7704918032786885	0.7407407407407407	0.7556162720097146	22.638065576553345	24.0	0.7217391304347827	0.7301587301587301	0.7115384615384616
237	24.0	0.7478260869565218	0.7142857142857143	0.7796610169491526	0.7483262325015216	0.7547169811320755	0.7419354838709677	0.7471377663204186	1.6550848484039307	24.0	0.6956521739130435	0.65	0.7454545454545455	0.6985696895922093	0.7358490566037735	0.6612903225806451	0.6955600937901824	6.339249849319458	24.0	0.7565217391304347	0.6811594202898551	0.8695652173913043	0.7659768715763846	0.8867924528301887	0.6451612903225806	0.7556162720097146	11.016304969787598	24.0	0.6869565217391305	0.639344262295082	0.7407407407407407	0.6905051734631771	0.7358490566037735	0.6451612903225806	0.6869328493647913	12.321554899215698	24.0	0.7652173913043478	0.75	0.7777777777777778	0.7630858186244673	0.7358490566037735	0.7903225806451613	0.7634285714285713	20.039854288101196	24.0	0.6869565217391305	0.6491228070175439	0.7241379310344828
238	24.0	0.7130434782608696	0.703125	0.7254901960784313	0.7117130750605327	0.7627118644067796	0.6607142857142857	0.7116480510599499	1.5051274299621582	24.0	0.7565217391304347	0.7818181818181819	0.7333333333333333	0.7572639225181598	0.7288135593220338	0.7857142857142857	0.7565033272837265	6.273160696029663	24.0	0.8	0.75	0.8837209302325582	0.7969128329297821	0.9152542372881356	0.6785714285714286	0.796052124296399	10.939972639083862	24.0	0.7304347826086957	0.7333333333333333	0.7272727272727273	0.7300242130750605	0.7457627118644068	0.7142857142857143	0.7301082595200243	12.318485736846924	24.0	0.7391304347826086	0.7457627118644068	0.7321428571428571	0.7389527845036319	0.7457627118644068	0.7321428571428571	0.7389527845036319	20.675572156906128	24.0	0.7391304347826086	0.7636363636363637	0.7166666666666667
239	24.0	0.782608695652174	0.8490566037735849	0.7258064516129032	0.7874315276932441	0.7258064516129032	0.8490566037735849	0.782608695652174	1.5586302280426025	24.0	0.7565217391304347	0.8035714285714286	0.711864406779661	0.7591296409007913	0.7258064516129032	0.7924528301886793	0.7563559322033899	6.4506635665893555	24.0	0.782608695652174	0.7681159420289855	0.8043478260869565	0.7764759586122946	0.8548387096774194	0.6981132075471698	0.7783175264091294	10.440985679626465	24.0	0.7043478260869566	0.7258064516129032	0.6792452830188679	0.7025258673158856	0.7258064516129032	0.6792452830188679	0.7025258673158856	11.402708530426025	24.0	0.7043478260869566	0.7333333333333333	0.6727272727272727	0.7038953134510042	0.7096774193548387	0.6981132075471698	0.7032483302975107	18.290329933166504	24.0	0.7304347826086957	0.7540983606557377	0.7037037037037037
240	25.0	0.7844827586206896	0.7377049180327869	0.8363636363636363	0.7876344086021505	0.8333333333333334	0.7419354838709677	0.7844667409884801	1.663538932800293	25.0	0.7844827586206896	0.7543859649122807	0.8135593220338984	0.7852449223416965	0.7962962962962963	0.7741935483870968	0.7840816022634205	6.613868713378906	25.0	0.75	0.6865671641791045	0.8367346938775511	0.7565710872162486	0.8518518518518519	0.6612903225806451	0.7495346586255677	10.972628116607666	25.0	0.8017241379310345	0.803921568627451	0.8	0.798984468339307	0.7592592592592593	0.8387096774193549	0.7999250093738284	13.017691135406494	25.0	0.7672413793103449	0.7647058823529411	0.7692307692307693	0.7643369175627239	0.7222222222222222	0.8064516129032258	0.7651293588301462	20.946736812591553	25.0	0.75	0.6923076923076923	0.8235294117647058
241	25.0	0.7739130434782608	0.75	0.7936507936507936	0.7718253968253967	0.75	0.7936507936507936	0.7718253968253967	1.716707468032837	25.0	0.808695652173913	0.7419354838709677	0.8867924528301887	0.8153235653235653	0.8846153846153846	0.746031746031746	0.808681185722928	7.017983675003052	25.0	0.7304347826086957	0.647887323943662	0.8636363636363636	0.7438949938949939	0.8846153846153846	0.6031746031746031	0.7291239267532862	11.435560464859009	25.0	0.782608695652174	0.7647058823529411	0.796875	0.7797619047619048	0.75	0.8095238095238095	0.7802155798486354	12.72179388999939	25.0	0.7130434782608696	0.6610169491525424	0.7678571428571429	0.7162698412698413	0.75	0.6825396825396826	0.7126958891664774	19.156471967697144	25.0	0.6956521739130435	0.660377358490566	0.7258064516129032
242	25.0	0.7652173913043478	0.7037037037037037	0.819672131147541	0.7665429808286951	0.7755102040816326	0.7575757575757576	0.7626328262365263	1.6283345222473145	25.0	0.782608695652174	0.7068965517241379	0.8596491228070176	0.7895794681508967	0.8367346938775511	0.7424242424242424	0.7815515538332953	6.698677062988281	25.0	0.8173913043478261	0.71875	0.9411764705882353	0.8330241187384044	0.9387755102040817	0.7272727272727273	0.8173360562741093	11.112226247787476	25.0	0.7739130434782608	0.7446808510638298	0.7941176470588235	0.7662337662337663	0.7142857142857143	0.8181818181818182	0.767568407960199	12.903995513916016	25.0	0.8260869565217391	0.8085106382978723	0.8382352941176471	0.8195732838589982	0.7755102040816326	0.8636363636363636	0.8212064676616915	22.41424536705017	25.0	0.7652173913043478	0.6896551724137931	0.8421052631578947
243	25.0	0.808695652173913	0.8545454545454545	0.7666666666666667	0.8111718275652702	0.7704918032786885	0.8518518518518519	0.808681185722928	1.4726741313934326	25.0	0.7739130434782608	0.8070175438596491	0.7413793103448276	0.775197328476017	0.7540983606557377	0.7962962962962963	0.7737590799031477	6.517268896102905	25.0	0.7478260869565218	0.75	0.7450980392156863	0.7452944748026715	0.7868852459016393	0.7037037037037037	0.745904761904762	10.318086624145508	25.0	0.7478260869565218	0.7857142857142857	0.711864406779661	0.7495446265938069	0.7213114754098361	0.7777777777777778	0.7477497919975796	12.385963439941406	25.0	0.7304347826086957	0.7777777777777778	0.6885245901639344	0.7331511839708561	0.6885245901639344	0.7777777777777778	0.7304347826086957	19.934681177139282	25.0	0.7739130434782608	0.7611940298507462	0.7916666666666666
244	25.0	0.7652173913043478	0.7924528301886793	0.7419354838709677	0.7655777374470659	0.7241379310344828	0.8070175438596491	0.7649330002271177	1.5646147727966309	25.0	0.7565217391304347	0.8	0.7230769230769231	0.7571082879612825	0.6896551724137931	0.8245614035087719	0.7556162720097146	6.237644195556641	25.0	0.7130434782608696	0.7192982456140351	0.7068965517241379	0.7130973986690865	0.7068965517241379	0.7192982456140351	0.7130434782608696	9.754944324493408	25.0	0.7478260869565218	0.7735849056603774	0.7258064516129032	0.7481851179673321	0.7068965517241379	0.7894736842105263	0.747520629873571	11.374537944793701	25.0	0.7652173913043478	0.7924528301886793	0.7419354838709677	0.7655777374470659	0.7241379310344828	0.8070175438596491	0.7649330002271177	21.089683055877686	25.0	0.7652173913043478	0.7627118644067796	0.7678571428571429
245	25.0	0.7913043478260869	0.8032786885245902	0.7777777777777778	0.790528233151184	0.8032786885245902	0.7777777777777778	0.790528233151184	1.5204458236694336	25.0	0.7565217391304347	0.7538461538461538	0.76	0.7534911961141469	0.8032786885245902	0.7037037037037037	0.7542735042735043	6.291569948196411	25.0	0.7565217391304347	0.7391304347826086	0.782608695652174	0.7513661202185793	0.8360655737704918	0.6666666666666666	0.7523076923076923	9.414494276046753	25.0	0.782608695652174	0.8214285714285714	0.7457627118644068	0.7844565877352763	0.7540983606557377	0.8148148148148148	0.7825429241358446	11.608853340148926	25.0	0.7565217391304347	0.7619047619047619	0.75	0.7545537340619308	0.7868852459016393	0.7222222222222222	0.7550213024954351	21.128719806671143	25.0	0.6782608695652174	0.7	0.6545454545454545
246	25.0	0.7565217391304347	0.7796610169491526	0.7321428571428571	0.7566788099574985	0.7540983606557377	0.7592592592592593	0.7560606060606061	1.8835046291351318	25.0	0.7739130434782608	0.8070175438596491	0.7413793103448276	0.775197328476017	0.7540983606557377	0.7962962962962963	0.7737590799031477	6.722661733627319	25.0	0.6869565217391305	0.6923076923076923	0.68	0.6836672738312083	0.7377049180327869	0.6296296296296297	0.6840659340659341	9.688666582107544	25.0	0.8	0.8166666666666667	0.7818181818181819	0.7997874924104432	0.8032786885245902	0.7962962962962963	0.7994540905299872	12.433372259140015	25.0	0.7478260869565218	0.7580645161290323	0.7358490566037735	0.7463570127504553	0.7704918032786885	0.7222222222222222	0.7465998024466226	22.352352380752563	25.0	0.6956521739130435	0.696969696969697	0.6938775510204082
247	25.0	0.7391304347826086	0.7090909090909091	0.7666666666666667	0.7388922702373706	0.7358490566037735	0.7419354838709677	0.7381602914389799	1.6883361339569092	25.0	0.7130434782608696	0.6724137931034483	0.7543859649122807	0.7146987218502738	0.7358490566037735	0.6935483870967742	0.7126958891664774	5.604147911071777	25.0	0.7391304347826086	0.6619718309859155	0.8636363636363636	0.7498478393183201	0.8867924528301887	0.6129032258064516	0.737522824102252	10.408128499984741	25.0	0.7130434782608696	0.6666666666666666	0.7636363636363637	0.7160681679853926	0.7547169811320755	0.6774193548387096	0.7129566598593148	12.036273717880249	25.0	0.7913043478260869	0.7843137254901961	0.796875	0.7886488131466829	0.7547169811320755	0.8225806451612904	0.7893772893772892	24.30983257293701	25.0	0.6869565217391305	0.6545454545454545	0.7166666666666667
248	25.0	0.7130434782608696	0.7321428571428571	0.6949152542372882	0.7135290556900726	0.6949152542372882	0.7321428571428571	0.7130434782608696	1.513559341430664	25.0	0.7391304347826086	0.7543859649122807	0.7241379310344828	0.7394067796610169	0.7288135593220338	0.75	0.7391107078039928	5.939038038253784	25.0	0.782608695652174	0.7428571428571429	0.8444444444444444	0.7799636803874093	0.8813559322033898	0.6785714285714286	0.7793383989561747	9.804858207702637	25.0	0.6869565217391305	0.6949152542372882	0.6785714285714286	0.6867433414043584	0.6949152542372882	0.6785714285714286	0.6867433414043584	11.953397989273071	25.0	0.7391304347826086	0.7230769230769231	0.76	0.737590799031477	0.7966101694915254	0.6785714285714286	0.737522824102252	19.771661043167114	25.0	0.7478260869565218	0.7678571428571429	0.7288135593220338
249	25.0	0.782608695652174	0.8363636363636363	0.7333333333333333	0.7860620815581254	0.7419354838709677	0.8301886792452831	0.7825429241358445	1.5576224327087402	25.0	0.7565217391304347	0.7833333333333333	0.7272727272727273	0.7563907486305539	0.7580645161290323	0.7547169811320755	0.7556162720097146	5.806147813796997	25.0	0.782608695652174	0.7761194029850746	0.7916666666666666	0.7778454047474133	0.8387096774193549	0.7169811320754716	0.7793383989561746	9.97567367553711	25.0	0.7130434782608696	0.7377049180327869	0.6851851851851852	0.7119598295800365	0.7258064516129032	0.6981132075471698	0.7116480510599499	11.824328899383545	25.0	0.6956521739130435	0.7288135593220338	0.6607142857142857	0.695830797321972	0.6935483870967742	0.6981132075471698	0.69482144211085	19.979217767715454	25.0	0.7130434782608696	0.7377049180327869	0.6851851851851852
250	26.0	0.7672413793103449	0.7213114754098361	0.8181818181818182	0.770310633213859	0.8148148148148148	0.7258064516129032	0.7672240802675585	1.6857163906097412	26.0	0.7931034482758621	0.7586206896551724	0.8275862068965517	0.7945041816009557	0.8148148148148148	0.7741935483870968	0.7928571428571428	6.621933937072754	26.0	0.7413793103448276	0.6818181818181818	0.82	0.7473118279569892	0.8333333333333334	0.6612903225806451	0.7410714285714286	10.130420446395874	26.0	0.7931034482758621	0.8	0.7878787878787878	0.7897252090800477	0.7407407407407407	0.8387096774193549	0.7908653846153846	13.502459049224854	26.0	0.75	0.7358490566037735	0.7619047619047619	0.7482078853046594	0.7222222222222222	0.7741935483870968	0.7484859813084113	20.739352226257324	26.0	0.7068965517241379	0.6515151515151515	0.78
251	26.0	0.7652173913043478	0.7272727272727273	0.8	0.7655677655677655	0.7692307692307693	0.7619047619047619	0.7640756781399589	1.6357979774475098	26.0	0.8173913043478261	0.7627118644067796	0.875	0.8215811965811965	0.8653846153846154	0.7777777777777778	0.8171701112877584	6.577637195587158	26.0	0.7565217391304347	0.6764705882352942	0.8723404255319149	0.7677045177045176	0.8846153846153846	0.6507936507936508	0.7560606060606061	11.233513593673706	26.0	0.782608695652174	0.7547169811320755	0.8064516129032258	0.7814407814407814	0.7692307692307693	0.7936507936507936	0.7809523809523808	12.472272157669067	26.0	0.7478260869565218	0.6885245901639344	0.8148148148148148	0.753052503052503	0.8076923076923077	0.6984126984126984	0.7477497919975795	18.780123233795166	26.0	0.6782608695652174	0.6415094339622641	0.7096774193548387
252	26.0	0.7913043478260869	0.7450980392156863	0.828125	0.7892702535559678	0.7755102040816326	0.803030303030303	0.7876923076923077	1.6106252670288086	26.0	0.8173913043478261	0.7592592592592593	0.8688524590163934	0.819882498453927	0.8367346938775511	0.803030303030303	0.8153810870728537	6.707685947418213	26.0	0.8	0.696969696969697	0.9387755102040817	0.8178726035868893	0.9387755102040817	0.696969696969697	0.8000000000000002	10.8010094165802	26.0	0.7913043478260869	0.7777777777777778	0.8	0.7813852813852814	0.7142857142857143	0.8484848484848485	0.7841051314142679	13.324573040008545	26.0	0.782608695652174	0.74	0.8153846153846154	0.7790661719233147	0.7551020408163265	0.803030303030303	0.7783175264091294	19.079615831375122	26.0	0.7652173913043478	0.6964285714285714	0.8305084745762712
253	26.0	0.782608695652174	0.8333333333333334	0.7377049180327869	0.7855191256830601	0.7377049180327869	0.8333333333333334	0.782608695652174	1.5408284664154053	26.0	0.7739130434782608	0.8301886792452831	0.7258064516129032	0.7773224043715847	0.7213114754098361	0.8333333333333334	0.7738959467634603	6.062482118606567	26.0	0.7652173913043478	0.75	0.7872340425531915	0.7606253794778386	0.8360655737704918	0.6851851851851852	0.7616854708726687	9.703921794891357	26.0	0.7217391304347827	0.7457627118644068	0.6964285714285714	0.7217668488160291	0.7213114754098361	0.7222222222222222	0.7212121212121212	12.165894985198975	26.0	0.7652173913043478	0.8148148148148148	0.7213114754098361	0.7680631451123254	0.7213114754098361	0.8148148148148148	0.7652173913043478	18.694494009017944	26.0	0.7652173913043478	0.765625	0.7647058823529411
254	26.0	0.7913043478260869	0.8035714285714286	0.7796610169491526	0.7914398064125832	0.7758620689655172	0.8070175438596491	0.7912885662431942	1.562253475189209	26.0	0.7217391304347827	0.782608695652174	0.6811594202898551	0.7226255293405929	0.6206896551724138	0.8245614035087719	0.7191697191697192	6.4363462924957275	26.0	0.7130434782608696	0.7192982456140351	0.7068965517241379	0.7130973986690865	0.7068965517241379	0.7192982456140351	0.7130434782608696	10.270921230316162	26.0	0.7304347826086957	0.7755102040816326	0.696969696969697	0.7310949788263763	0.6551724137931034	0.8070175438596491	0.7291239267532862	11.848670721054077	26.0	0.782608695652174	0.8	0.7666666666666667	0.7828191167574108	0.7586206896551724	0.8070175438596491	0.7825429241358445	19.85988473892212	26.0	0.7478260869565218	0.7543859649122807	0.7413793103448276
255	26.0	0.7304347826086957	0.75	0.7090909090909091	0.7299635701275046	0.7377049180327869	0.7222222222222222	0.7296989915838956	1.5162484645843506	26.0	0.7565217391304347	0.7323943661971831	0.7954545454545454	0.7503035822707953	0.8524590163934426	0.6481481481481481	0.7510822510822511	5.861041784286499	26.0	0.7391304347826086	0.7246376811594203	0.7608695652173914	0.7339101396478446	0.819672131147541	0.6481481481481481	0.7346153846153847	8.950857400894165	26.0	0.8	0.8166666666666667	0.7818181818181819	0.7997874924104432	0.8032786885245902	0.7962962962962963	0.7994540905299872	11.124178409576416	26.0	0.7391304347826086	0.7627118644067796	0.7142857142857143	0.7392228293867638	0.7377049180327869	0.7407407407407407	0.7386363636363638	20.160712957382202	26.0	0.6695652173913044	0.6949152542372882	0.6428571428571429
256	26.0	0.7739130434782608	0.7868852459016393	0.7592592592592593	0.7730722525804493	0.7868852459016393	0.7592592592592593	0.7730722525804492	1.8905181884765625	26.0	0.808695652173913	0.8421052631578947	0.7758620689655172	0.8101092896174864	0.7868852459016393	0.8333333333333334	0.8085653753026634	6.849599361419678	26.0	0.6869565217391305	0.6923076923076923	0.68	0.6836672738312083	0.7377049180327869	0.6296296296296297	0.6840659340659341	10.399351119995117	26.0	0.7652173913043478	0.7931034482758621	0.7368421052631579	0.7659380692167577	0.7540983606557377	0.7777777777777778	0.7649330002271177	12.319740056991577	26.0	0.7652173913043478	0.7741935483870968	0.7547169811320755	0.76381299332119	0.7868852459016393	0.7407407407407407	0.764075678139959	22.52020263671875	26.0	0.7304347826086957	0.75	0.7090909090909091
257	26.0	0.7565217391304347	0.7272727272727273	0.7833333333333333	0.7563907486305539	0.7547169811320755	0.7580645161290323	0.7556162720097146	1.6554057598114014	26.0	0.7130434782608696	0.6724137931034483	0.7543859649122807	0.7146987218502738	0.7358490566037735	0.6935483870967742	0.7126958891664774	6.5327064990997314	26.0	0.7565217391304347	0.6811594202898551	0.8695652173913043	0.7659768715763846	0.8867924528301887	0.6451612903225806	0.7556162720097146	10.831572532653809	26.0	0.7130434782608696	0.6785714285714286	0.7457627118644068	0.7133292757151553	0.7169811320754716	0.7096774193548387	0.7122602168473728	12.573427200317383	26.0	0.7913043478260869	0.7843137254901961	0.796875	0.7886488131466829	0.7547169811320755	0.8225806451612904	0.7893772893772892	19.808051109313965	26.0	0.7043478260869566	0.6792452830188679	0.7258064516129032
258	26.0	0.7391304347826086	0.7377049180327869	0.7407407407407407	0.7384987893462469	0.7627118644067796	0.7142857142857143	0.7386363636363638	1.5086374282836914	26.0	0.782608695652174	0.7931034482758621	0.7719298245614035	0.7826876513317191	0.7796610169491526	0.7857142857142857	0.7825429241358444	6.173305988311768	26.0	0.7739130434782608	0.7391304347826086	0.8260869565217391	0.7714891041162228	0.864406779661017	0.6785714285714286	0.7709865196078431	11.308668375015259	26.0	0.7130434782608696	0.7166666666666667	0.7090909090909091	0.7126210653753027	0.7288135593220338	0.6964285714285714	0.7126958891664774	11.75312614440918	26.0	0.7304347826086957	0.71875	0.7450980392156863	0.7291162227602905	0.7796610169491526	0.6785714285714286	0.7291239267532862	19.389233589172363	26.0	0.7565217391304347	0.7719298245614035	0.7413793103448276
259	26.0	0.7652173913043478	0.8301886792452831	0.7096774193548387	0.7699330493000609	0.7096774193548387	0.8301886792452831	0.7652173913043478	1.5660579204559326	26.0	0.7391304347826086	0.7962962962962963	0.6885245901639344	0.7430006086427268	0.6935483870967742	0.7924528301886793	0.7391107078039927	5.6027445793151855	26.0	0.7565217391304347	0.7361111111111112	0.7906976744186046	0.7481740718198417	0.8548387096774194	0.6415094339622641	0.7496890547263682	10.218737125396729	26.0	0.6869565217391305	0.7166666666666667	0.6545454545454545	0.6863968350578211	0.6935483870967742	0.6792452830188679	0.6857923497267759	12.173813581466675	26.0	0.7043478260869566	0.71875	0.6862745098039216	0.7011564211807668	0.7419354838709677	0.660377358490566	0.7016178266178267	19.365351676940918	26.0	0.7217391304347827	0.7419354838709677	0.6981132075471698
260	27.0	0.7844827586206896	0.7543859649122807	0.8135593220338984	0.7852449223416965	0.7962962962962963	0.7741935483870968	0.7840816022634205	1.708289384841919	27.0	0.8017241379310345	0.7627118644067796	0.8421052631578947	0.803763440860215	0.8333333333333334	0.7741935483870968	0.8015914330333903	6.642668008804321	27.0	0.7327586206896551	0.676923076923077	0.803921568627451	0.73805256869773	0.8148148148148148	0.6612903225806451	0.7325797575667434	11.313001155853271	27.0	0.8189655172413793	0.8367346938775511	0.8059701492537313	0.8151135005973715	0.7592592592592593	0.8709677419354839	0.8166629035899752	12.754440069198608	27.0	0.7758620689655172	0.7592592592592593	0.7903225806451613	0.7747909199522103	0.7592592592592593	0.7903225806451613	0.7747909199522103	22.37482976913452	27.0	0.7413793103448276	0.6818181818181818	0.82
261	27.0	0.782608695652174	0.7368421052631579	0.8275862068965517	0.7847985347985348	0.8076923076923077	0.7619047619047619	0.7820153157934644	1.609954595565796	27.0	0.782608695652174	0.7288135593220338	0.8392857142857143	0.7864774114774115	0.8269230769230769	0.746031746031746	0.7823453705806647	6.721234560012817	27.0	0.7391304347826086	0.6617647058823529	0.851063829787234	0.7501526251526252	0.8653846153846154	0.6349206349206349	0.7386363636363636	10.6269211769104	27.0	0.7565217391304347	0.7222222222222222	0.7868852459016393	0.7559523809523809	0.75	0.7619047619047619	0.7550213024954351	12.490991830825806	27.0	0.7652173913043478	0.7192982456140351	0.8103448275862069	0.7672466422466422	0.7884615384615384	0.746031746031746	0.7645765410569414	18.91936469078064	27.0	0.6869565217391305	0.6481481481481481	0.7213114754098361
262	27.0	0.808695652173913	0.7755102040816326	0.8333333333333334	0.804421768707483	0.7755102040816326	0.8333333333333334	0.804421768707483	1.6205322742462158	27.0	0.7913043478260869	0.7192982456140351	0.8620689655172413	0.7971552257266543	0.8367346938775511	0.7575757575757576	0.7900182592818015	6.633548736572266	27.0	0.8173913043478261	0.7258064516129032	0.9245283018867925	0.830395794681509	0.9183673469387755	0.7424242424242424	0.8171701112877584	10.846318006515503	27.0	0.8173913043478261	0.8333333333333334	0.8082191780821918	0.8041125541125541	0.7142857142857143	0.8939393939393939	0.8090758162700609	12.87539005279541	27.0	0.7565217391304347	0.7058823529411765	0.796875	0.7537105751391466	0.7346938775510204	0.7727272727272727	0.7523076923076923	22.76496458053589	27.0	0.7565217391304347	0.6909090909090909	0.8166666666666667
263	27.0	0.7913043478260869	0.8775510204081632	0.7272727272727273	0.7969034608378871	0.7049180327868853	0.8888888888888888	0.7909090909090909	1.4682190418243408	27.0	0.8	0.8518518518518519	0.7540983606557377	0.8029751062537948	0.7540983606557377	0.8518518518518519	0.7999999999999999	6.507902145385742	27.0	0.7478260869565218	0.7424242424242424	0.7551020408163265	0.7442319368548878	0.8032786885245902	0.6851851851851852	0.7450500726244171	9.910120964050293	27.0	0.7478260869565218	0.7962962962962963	0.7049180327868853	0.7506071645415908	0.7049180327868853	0.7962962962962963	0.7478260869565216	12.202854633331299	27.0	0.7391304347826086	0.7719298245614035	0.7068965517241379	0.7402853673345478	0.7213114754098361	0.7592592592592593	0.7389527845036319	17.91832971572876	27.0	0.7478260869565218	0.7424242424242424	0.7551020408163265
264	27.0	0.808695652173913	0.86	0.7692307692307693	0.8092861464004839	0.7413793103448276	0.8771929824561403	0.8079842137219186	1.5715346336364746	27.0	0.7739130434782608	0.82	0.7384615384615385	0.7745009074410163	0.7068965517241379	0.8421052631578947	0.7730722525804493	6.266956806182861	27.0	0.7217391304347827	0.7321428571428571	0.711864406779661	0.7218693284936479	0.7068965517241379	0.7368421052631579	0.7217180883242589	10.00007438659668	27.0	0.7391304347826086	0.7916666666666666	0.7014925373134329	0.7398669086509377	0.6551724137931034	0.8245614035087719	0.737522824102252	11.892942667007446	27.0	0.7391304347826086	0.78	0.7076923076923077	0.7397156684815487	0.6724137931034483	0.8070175438596491	0.73816029143898	18.542604446411133	27.0	0.7565217391304347	0.7777777777777778	0.7377049180327869
265	27.0	0.7913043478260869	0.8135593220338984	0.7678571428571429	0.7915907710989678	0.7868852459016393	0.7962962962962963	0.790909090909091	1.501943826675415	27.0	0.8	0.7878787878787878	0.8163265306122449	0.7965998785670916	0.8524590163934426	0.7407407407407407	0.7977983334607447	6.285001754760742	27.0	0.7478260869565218	0.7352941176470589	0.7659574468085106	0.7431693989071038	0.819672131147541	0.6666666666666666	0.7440325427891625	10.028126001358032	27.0	0.782608695652174	0.8461538461538461	0.7301587301587301	0.786581663630844	0.7213114754098361	0.8518518518518519	0.7825429241358445	12.527381181716919	27.0	0.7478260869565218	0.7580645161290323	0.7358490566037735	0.7463570127504553	0.7704918032786885	0.7222222222222222	0.7465998024466226	21.354863166809082	27.0	0.6782608695652174	0.6935483870967742	0.660377358490566
266	27.0	0.7652173913043478	0.7741935483870968	0.7547169811320755	0.76381299332119	0.7868852459016393	0.7407407407407407	0.764075678139959	1.8720154762268066	27.0	0.7739130434782608	0.8070175438596491	0.7413793103448276	0.775197328476017	0.7540983606557377	0.7962962962962963	0.7737590799031477	6.883508682250977	27.0	0.7217391304347827	0.7301587301587301	0.7115384615384616	0.7196417729204614	0.7540983606557377	0.6851851851851852	0.7200243457090687	10.012979745864868	27.0	0.7478260869565218	0.7580645161290323	0.7358490566037735	0.7463570127504553	0.7704918032786885	0.7222222222222222	0.7465998024466226	11.8054039478302	27.0	0.7478260869565218	0.7666666666666667	0.7272727272727273	0.7474195506982392	0.7540983606557377	0.7407407407407407	0.7471377663204186	21.02509903907776	27.0	0.7391304347826086	0.746031746031746	0.7307692307692307
267	27.0	0.7652173913043478	0.76	0.7692307692307693	0.7617163724893488	0.7169811320754716	0.8064516129032258	0.7626328262365262	1.521704912185669	27.0	0.6956521739130435	0.65	0.7454545454545455	0.6985696895922093	0.7358490566037735	0.6612903225806451	0.6955600937901824	6.912783145904541	27.0	0.7391304347826086	0.6666666666666666	0.8478260869565217	0.7484783931832015	0.8679245283018868	0.6290322580645161	0.7381602914389799	10.340802192687988	27.0	0.6956521739130435	0.65	0.7454545454545455	0.6985696895922093	0.7358490566037735	0.6612903225806451	0.6955600937901824	12.142141342163086	27.0	0.7739130434782608	0.7647058823529411	0.78125	0.7711503347534996	0.7358490566037735	0.8064516129032258	0.7718253968253967	20.738942623138428	27.0	0.6956521739130435	0.6666666666666666	0.7213114754098361
268	27.0	0.6956521739130435	0.7068965517241379	0.6842105263157895	0.6956719128329298	0.6949152542372882	0.6964285714285714	0.6955600937901822	1.2976775169372559	27.0	0.7478260869565218	0.7678571428571429	0.7288135593220338	0.7483353510895884	0.7288135593220338	0.7678571428571429	0.7478260869565218	6.690338850021362	27.0	0.8	0.7647058823529411	0.851063829787234	0.7978208232445521	0.8813559322033898	0.7142857142857143	0.7977983334607446	10.471046686172485	27.0	0.7391304347826086	0.7377049180327869	0.7407407407407407	0.7384987893462469	0.7627118644067796	0.7142857142857143	0.7386363636363638	10.783134698867798	27.0	0.7217391304347827	0.7213114754098361	0.7222222222222222	0.7210956416464891	0.7457627118644068	0.6964285714285714	0.7212121212121212	20.006690979003906	27.0	0.7565217391304347	0.7818181818181819	0.7333333333333333
269	27.0	0.7739130434782608	0.8461538461538461	0.7142857142857143	0.7793670115642118	0.7096774193548387	0.8490566037735849	0.7738959467634604	1.3318994045257568	27.0	0.7739130434782608	0.8214285714285714	0.7288135593220338	0.7766281192939745	0.7419354838709677	0.8113207547169812	0.7737590799031477	6.78032374382019	27.0	0.8	0.7746478873239436	0.8409090909090909	0.7926049908703591	0.8870967741935484	0.6981132075471698	0.7949771335555382	10.38414716720581	27.0	0.6869565217391305	0.7096774193548387	0.660377358490566	0.6850273889227023	0.7096774193548387	0.660377358490566	0.6850273889227024	10.472045421600342	27.0	0.6956521739130435	0.7213114754098361	0.6666666666666666	0.6944613511868534	0.7096774193548387	0.6792452830188679	0.6941721753666135	19.743510723114014	27.0	0.7391304347826086	0.7580645161290323	0.7169811320754716
270	28.0	0.7327586206896551	0.7017543859649122	0.7627118644067796	0.733273596176822	0.7407407407407407	0.7258064516129032	0.7322611868066413	1.6378576755523682	28.0	0.8017241379310345	0.7719298245614035	0.8305084745762712	0.802568697729988	0.8148148148148148	0.7903225806451613	0.8013550740823467	7.156933069229126	28.0	0.7586206896551724	0.6911764705882353	0.8541666666666666	0.7658303464755077	0.8703703703703703	0.6612903225806451	0.7579731743666169	10.654750347137451	28.0	0.8103448275862069	0.7962962962962963	0.8225806451612904	0.8094384707287934	0.7962962962962963	0.8225806451612904	0.8094384707287934	12.9201819896698	28.0	0.7672413793103449	0.7368421052631579	0.7966101694915254	0.7679211469534051	0.7777777777777778	0.7580645161290323	0.766808130444494	19.58830761909485	28.0	0.7327586206896551	0.6825396825396826	0.7924528301886793
271	28.0	0.7739130434782608	0.7241379310344828	0.8245614035087719	0.7768620268620269	0.8076923076923077	0.746031746031746	0.7734848484848484	1.665651559829712	28.0	0.8	0.7377049180327869	0.8703703703703703	0.8057081807081807	0.8653846153846154	0.746031746031746	0.799939490204977	6.90783429145813	28.0	0.7652173913043478	0.6865671641791045	0.875	0.7756410256410255	0.8846153846153846	0.6666666666666666	0.7649330002271179	10.365829706192017	28.0	0.7304347826086957	0.6842105263157895	0.7758620689655172	0.7321428571428572	0.75	0.7142857142857143	0.7296989915838958	12.118906021118164	28.0	0.7478260869565218	0.7017543859649122	0.7931034482758621	0.7496947496947497	0.7692307692307693	0.7301587301587301	0.7471377663204186	18.78606343269348	28.0	0.6956521739130435	0.660377358490566	0.7258064516129032
272	28.0	0.7913043478260869	0.7450980392156863	0.828125	0.7892702535559678	0.7755102040816326	0.803030303030303	0.7876923076923077	1.6458337306976318	28.0	0.8	0.7407407407407407	0.8524590163934426	0.8021026592455164	0.8163265306122449	0.7878787878787878	0.7977983334607447	6.840839385986328	28.0	0.8173913043478261	0.71875	0.9411764705882353	0.8330241187384044	0.9387755102040817	0.7272727272727273	0.8173360562741093	11.291666507720947	28.0	0.7913043478260869	0.7777777777777778	0.8	0.7813852813852814	0.7142857142857143	0.8484848484848485	0.7841051314142679	12.47147798538208	28.0	0.8260869565217391	0.8222222222222222	0.8285714285714286	0.8169449598021026	0.7551020408163265	0.8787878787878788	0.8200876095118899	21.22810697555542	28.0	0.7739130434782608	0.7090909090909091	0.8333333333333334
273	28.0	0.7913043478260869	0.8627450980392157	0.734375	0.7958409228901032	0.7213114754098361	0.8703703703703703	0.7911622276029056	1.4639966487884521	28.0	0.7652173913043478	0.8148148148148148	0.7213114754098361	0.7680631451123254	0.7213114754098361	0.8148148148148148	0.7652173913043478	6.406411170959473	28.0	0.7478260869565218	0.75	0.7450980392156863	0.7452944748026715	0.7868852459016393	0.7037037037037037	0.745904761904762	9.721883296966553	28.0	0.7652173913043478	0.7931034482758621	0.7368421052631579	0.7659380692167577	0.7540983606557377	0.7777777777777778	0.7649330002271177	11.886402130126953	28.0	0.7565217391304347	0.8113207547169812	0.7096774193548387	0.75986642380085	0.7049180327868853	0.8148148148148148	0.7565033272837265	18.862369775772095	28.0	0.7739130434782608	0.7777777777777778	0.7692307692307693
274	28.0	0.808695652173913	0.8461538461538461	0.7777777777777778	0.809134906231095	0.7586206896551724	0.8596491228070176	0.8083333333333333	1.536059856414795	28.0	0.7913043478260869	0.84	0.7538461538461538	0.7918935269207501	0.7241379310344828	0.8596491228070176	0.7905282331511839	6.568208456039429	28.0	0.7043478260869566	0.6935483870967742	0.7169811320754716	0.7040229885057472	0.7413793103448276	0.6666666666666666	0.7037878787878789	10.18156123161316	28.0	0.7304347826086957	0.7647058823529411	0.703125	0.7309437386569873	0.6724137931034483	0.7894736842105263	0.7296989915838956	11.601534843444824	28.0	0.782608695652174	0.8113207547169812	0.7580645161290323	0.7829703569267998	0.7413793103448276	0.8245614035087719	0.7823453705806647	22.626752376556396	28.0	0.7565217391304347	0.75	0.7636363636363637
275	28.0	0.782608695652174	0.8	0.7636363636363637	0.7823315118397085	0.7868852459016393	0.7777777777777778	0.7820153157934643	1.5090577602386475	28.0	0.7565217391304347	0.7391304347826086	0.782608695652174	0.7513661202185793	0.8360655737704918	0.6666666666666666	0.7523076923076923	6.070024728775024	28.0	0.7652173913043478	0.75	0.7872340425531915	0.7606253794778386	0.8360655737704918	0.6851851851851852	0.7616854708726687	10.721346855163574	28.0	0.8173913043478261	0.8571428571428571	0.7796610169491526	0.8193685488767456	0.7868852459016393	0.8518518518518519	0.8173360562741094	11.174141645431519	28.0	0.7304347826086957	0.734375	0.7254901960784313	0.7278384942319369	0.7704918032786885	0.6851851851851852	0.7283809523809524	20.093226432800293	28.0	0.6434782608695652	0.6724137931034483	0.6140350877192983
276	28.0	0.7652173913043478	0.7833333333333333	0.7454545454545455	0.7648755312689739	0.7704918032786885	0.7592592592592593	0.7645765410569414	1.8931584358215332	28.0	0.7565217391304347	0.8	0.7166666666666667	0.7588038858530661	0.7213114754098361	0.7962962962962963	0.7565033272837265	6.681652069091797	28.0	0.6956521739130435	0.703125	0.6862745098039216	0.6929265330904675	0.7377049180327869	0.6481481481481481	0.6933333333333334	9.896229267120361	28.0	0.7478260869565218	0.7580645161290323	0.7358490566037735	0.7463570127504553	0.7704918032786885	0.7222222222222222	0.7465998024466226	12.394715309143066	28.0	0.7391304347826086	0.7719298245614035	0.7068965517241379	0.7402853673345478	0.7213114754098361	0.7592592592592593	0.7389527845036319	21.59795832633972	28.0	0.7130434782608696	0.7258064516129032	0.6981132075471698
277	28.0	0.7739130434782608	0.7368421052631579	0.8103448275862069	0.7752586731588558	0.7924528301886793	0.7580645161290323	0.7734848484848484	1.5979931354522705	28.0	0.6869565217391305	0.6440677966101694	0.7321428571428571	0.6891357273280584	0.7169811320754716	0.6612903225806451	0.6867433414043582	6.7462849617004395	28.0	0.7478260869565218	0.6666666666666666	0.8837209302325582	0.7592818015824712	0.9056603773584906	0.6129032258064516	0.7459047619047618	11.2873694896698	28.0	0.6782608695652174	0.6428571428571429	0.711864406779661	0.6783323189287888	0.6792452830188679	0.6774193548387096	0.6773826673743271	12.65201735496521	28.0	0.808695652173913	0.7924528301886793	0.8225806451612904	0.8075167376749848	0.7924528301886793	0.8225806451612904	0.8075167376749848	22.54071354866028	28.0	0.6869565217391305	0.6545454545454545	0.7166666666666667
278	28.0	0.7043478260869566	0.7049180327868853	0.7037037037037037	0.7036924939467313	0.7288135593220338	0.6785714285714286	0.7037878787878787	1.3247570991516113	28.0	0.7565217391304347	0.7540983606557377	0.7592592592592593	0.7559019370460048	0.7796610169491526	0.7321428571428571	0.7560606060606061	7.05061674118042	28.0	0.7739130434782608	0.726027397260274	0.8571428571428571	0.7705811138014529	0.8983050847457628	0.6428571428571429	0.7688620902906618	10.950182914733887	28.0	0.7391304347826086	0.7543859649122807	0.7241379310344828	0.7394067796610169	0.7288135593220338	0.75	0.7391107078039928	11.707467079162598	28.0	0.7391304347826086	0.7377049180327869	0.7407407407407407	0.7384987893462469	0.7627118644067796	0.7142857142857143	0.7386363636363638	18.899425745010376	28.0	0.7391304347826086	0.7457627118644068	0.7321428571428571
279	28.0	0.7391304347826086	0.82	0.676923076923077	0.7457395009129641	0.6612903225806451	0.8301886792452831	0.738952784503632	1.3555324077606201	28.0	0.7391304347826086	0.7962962962962963	0.6885245901639344	0.7430006086427268	0.6935483870967742	0.7924528301886793	0.7391107078039927	6.96094822883606	28.0	0.8	0.7910447761194029	0.8125	0.7953438831405965	0.8548387096774194	0.7358490566037735	0.7969913270396807	10.30921745300293	28.0	0.6782608695652174	0.7272727272727273	0.6333333333333333	0.6810712111990261	0.6451612903225806	0.7169811320754716	0.6781635277210498	11.680373430252075	28.0	0.6695652173913044	0.7	0.6363636363636364	0.6688983566646378	0.6774193548387096	0.660377358490566	0.6683363691560412	19.585631608963013	28.0	0.6956521739130435	0.7454545454545455	0.65
280	29.0	0.7672413793103449	0.7368421052631579	0.7966101694915254	0.7679211469534051	0.7777777777777778	0.7580645161290323	0.766808130444494	1.6436548233032227	29.0	0.7844827586206896	0.7543859649122807	0.8135593220338984	0.7852449223416965	0.7962962962962963	0.7741935483870968	0.7840816022634205	6.987186431884766	29.0	0.7586206896551724	0.6857142857142857	0.8695652173913043	0.7670250896057347	0.8888888888888888	0.6451612903225806	0.7574671445639187	11.009647130966187	29.0	0.7672413793103449	0.7454545454545455	0.7868852459016393	0.766726403823178	0.7592592592592593	0.7741935483870968	0.7663906914298502	13.399336099624634	29.0	0.7586206896551724	0.7321428571428571	0.7833333333333333	0.7586618876941458	0.7592592592592593	0.7580645161290323	0.7579731743666169	22.624919891357422	29.0	0.7241379310344828	0.671875	0.7884615384615384
281	29.0	0.808695652173913	0.7678571428571429	0.847457627118644	0.8102869352869353	0.8269230769230769	0.7936507936507936	0.8079842137219186	1.652428150177002	29.0	0.7739130434782608	0.7166666666666667	0.8363636363636363	0.7785409035409034	0.8269230769230769	0.7301587301587301	0.7737590799031477	6.853733539581299	29.0	0.7565217391304347	0.6764705882352942	0.8723404255319149	0.7677045177045176	0.8846153846153846	0.6507936507936508	0.7560606060606061	11.357391834259033	29.0	0.8	0.7735849056603774	0.8225806451612904	0.798992673992674	0.7884615384615384	0.8095238095238095	0.7984761904761906	11.84086298942566	29.0	0.7565217391304347	0.7	0.8181818181818182	0.760989010989011	0.8076923076923077	0.7142857142857143	0.7563559322033899	20.19015860557556	29.0	0.6695652173913044	0.6346153846153846	0.6984126984126984
282	29.0	0.808695652173913	0.7755102040816326	0.8333333333333334	0.804421768707483	0.7755102040816326	0.8333333333333334	0.804421768707483	1.6175146102905273	29.0	0.7913043478260869	0.7192982456140351	0.8620689655172413	0.7971552257266543	0.8367346938775511	0.7575757575757576	0.7900182592818015	6.634125709533691	29.0	0.7913043478260869	0.6923076923076923	0.92	0.8076685219542363	0.9183673469387755	0.696969696969697	0.7912885662431941	10.6741361618042	29.0	0.8260869565217391	0.8536585365853658	0.8108108108108109	0.8116883116883117	0.7142857142857143	0.9090909090909091	0.8174603174603174	13.602745056152344	29.0	0.808695652173913	0.7755102040816326	0.8333333333333334	0.804421768707483	0.7755102040816326	0.8333333333333334	0.804421768707483	22.127789735794067	29.0	0.7391304347826086	0.6792452830188679	0.7903225806451613
283	29.0	0.7652173913043478	0.8035714285714286	0.7288135593220338	0.7670006071645417	0.7377049180327869	0.7962962962962963	0.7651463580667122	1.560805082321167	29.0	0.7565217391304347	0.7894736842105263	0.7241379310344828	0.7577413479052824	0.7377049180327869	0.7777777777777778	0.7563559322033899	6.478755474090576	29.0	0.7478260869565218	0.7424242424242424	0.7551020408163265	0.7442319368548878	0.8032786885245902	0.6851851851851852	0.7450500726244171	9.989591360092163	29.0	0.7217391304347827	0.7543859649122807	0.6896551724137931	0.7228293867638129	0.7049180327868853	0.7407407407407407	0.7215496368038741	12.067627429962158	29.0	0.7565217391304347	0.8	0.7166666666666667	0.7588038858530661	0.7213114754098361	0.7962962962962963	0.7565033272837265	18.088908433914185	29.0	0.782608695652174	0.7727272727272727	0.7959183673469388
284	29.0	0.7565217391304347	0.8	0.7230769230769231	0.7571082879612825	0.6896551724137931	0.8245614035087719	0.7556162720097146	1.5918934345245361	29.0	0.7565217391304347	0.7777777777777778	0.7377049180327869	0.7568058076225046	0.7241379310344828	0.7894736842105263	0.7563559322033899	6.619947910308838	29.0	0.7217391304347827	0.7166666666666667	0.7272727272727273	0.7215668481548699	0.7413793103448276	0.7017543859649122	0.7215496368038741	10.114282846450806	29.0	0.7478260869565218	0.7735849056603774	0.7258064516129032	0.7481851179673321	0.7068965517241379	0.7894736842105263	0.747520629873571	11.902475833892822	29.0	0.782608695652174	0.7894736842105263	0.7758620689655172	0.7826678765880217	0.7758620689655172	0.7894736842105263	0.7826086956521741	19.314440965652466	29.0	0.7391304347826086	0.7592592592592593	0.7213114754098361
285	29.0	0.7913043478260869	0.8032786885245902	0.7777777777777778	0.790528233151184	0.8032786885245902	0.7777777777777778	0.790528233151184	1.545457124710083	29.0	0.7478260869565218	0.7285714285714285	0.7777777777777778	0.74210686095932	0.8360655737704918	0.6481481481481481	0.7428483306345901	6.624319791793823	29.0	0.7478260869565218	0.7352941176470589	0.7659574468085106	0.7431693989071038	0.819672131147541	0.6666666666666666	0.7440325427891625	10.208671569824219	29.0	0.7739130434782608	0.8070175438596491	0.7413793103448276	0.775197328476017	0.7540983606557377	0.7962962962962963	0.7737590799031477	11.976458072662354	29.0	0.7304347826086957	0.75	0.7090909090909091	0.7299635701275046	0.7377049180327869	0.7222222222222222	0.7296989915838956	20.036685705184937	29.0	0.6782608695652174	0.7068965517241379	0.6491228070175439
286	29.0	0.782608695652174	0.78125	0.7843137254901961	0.7802064359441409	0.819672131147541	0.7407407407407407	0.7809523809523808	1.883450984954834	29.0	0.8	0.8518518518518519	0.7540983606557377	0.8029751062537948	0.7540983606557377	0.8518518518518519	0.7999999999999999	6.632465124130249	29.0	0.7130434782608696	0.7333333333333333	0.6909090909090909	0.7125075895567698	0.7213114754098361	0.7037037037037037	0.7122602168473728	10.31081223487854	29.0	0.782608695652174	0.7903225806451613	0.7735849056603774	0.7812689738919247	0.8032786885245902	0.7592592592592593	0.7815515538332953	12.1236891746521	29.0	0.7913043478260869	0.8032786885245902	0.7777777777777778	0.790528233151184	0.8032786885245902	0.7777777777777778	0.790528233151184	20.390472888946533	29.0	0.6956521739130435	0.703125	0.6862745098039216
287	29.0	0.7565217391304347	0.7272727272727273	0.7833333333333333	0.7563907486305539	0.7547169811320755	0.7580645161290323	0.7556162720097146	1.6598577499389648	29.0	0.7217391304347827	0.6842105263157895	0.7586206896551724	0.7227632379793061	0.7358490566037735	0.7096774193548387	0.7212121212121212	6.352477550506592	29.0	0.7391304347826086	0.6575342465753424	0.8809523809523809	0.7512172854534389	0.9056603773584906	0.5967741935483871	0.7367216117216118	10.2599618434906	29.0	0.7391304347826086	0.7090909090909091	0.7666666666666667	0.7388922702373706	0.7358490566037735	0.7419354838709677	0.7381602914389799	12.358936071395874	29.0	0.7739130434782608	0.7755102040816326	0.7727272727272727	0.769780888618381	0.7169811320754716	0.8225806451612904	0.7709865196078431	19.527164459228516	29.0	0.7130434782608696	0.6851851851851852	0.7377049180327869
288	29.0	0.7391304347826086	0.7457627118644068	0.7321428571428571	0.7389527845036319	0.7457627118644068	0.7321428571428571	0.7389527845036319	1.512002944946289	29.0	0.7304347826086957	0.7592592592592593	0.7049180327868853	0.7313861985472155	0.6949152542372882	0.7678571428571429	0.7303532259284472	6.679889678955078	29.0	0.8	0.7571428571428571	0.8666666666666667	0.7973668280871671	0.8983050847457628	0.6964285714285714	0.7969913270396807	10.441944122314453	29.0	0.6956521739130435	0.7	0.6909090909090909	0.6952179176755449	0.711864406779661	0.6785714285714286	0.6952835188129305	11.323414325714111	29.0	0.7304347826086957	0.7333333333333333	0.7272727272727273	0.7300242130750605	0.7457627118644068	0.7142857142857143	0.7301082595200243	18.540313720703125	29.0	0.7478260869565218	0.7678571428571429	0.7288135593220338
289	29.0	0.7739130434782608	0.8333333333333334	0.7213114754098361	0.7779975654290932	0.7258064516129032	0.8301886792452831	0.7738959467634603	1.5477125644683838	29.0	0.782608695652174	0.8363636363636363	0.7333333333333333	0.7860620815581254	0.7419354838709677	0.8301886792452831	0.7825429241358445	6.557739496231079	29.0	0.7913043478260869	0.7714285714285715	0.8222222222222222	0.7845404747413268	0.8709677419354839	0.6981132075471698	0.7866419294990724	10.508039474487305	29.0	0.7304347826086957	0.7719298245614035	0.6896551724137931	0.7321972002434571	0.7096774193548387	0.7547169811320755	0.7301082595200242	11.570611000061035	29.0	0.7043478260869566	0.71875	0.6862745098039216	0.7011564211807668	0.7419354838709677	0.660377358490566	0.7016178266178267	17.931898593902588	29.0	0.7217391304347827	0.734375	0.7058823529411765
[truncated: 147 more columns]

## Sheet: TfIdf
Column1	TfIdf(1,1)_deep	TfIdf(1,1)_prec	TfIdf(1,1)_prec_fake	TfIdf(1,1)_prec_real	TfIdf(1,1)_rec	TfIdf(1,1)_rec_fake	TfIdf(1,1)_rec_real	TfIdf(1,1)_f1-sc	TfIdf(1,1)_time	TfIdf(2,2)_deep	TfIdf(2,2)_prec	TfIdf(2,2)_prec_fake	TfIdf(2,2)_prec_real	TfIdf(2,2)_rec	TfIdf(2,2)_rec_fake	TfIdf(2,2)_rec_real	TfIdf(2,2)_f1-sc	TfIdf(2,2)_time	TfIdf(3,3)_deep	TfIdf(3,3)_prec	TfIdf(3,3)_prec_fake	TfIdf(3,3)_prec_real	TfIdf(3,3)_rec	TfIdf(3,3)_rec_fake	TfIdf(3,3)_rec_real	TfIdf(3,3)_f1-sc	TfIdf(3,3)_time	TfIdf(1,3)_deep	TfIdf(1,3)_prec	TfIdf(1,3)_prec_fake	TfIdf(1,3)_prec_real	TfIdf(1,3)_rec	TfIdf(1,3)_rec_fake	TfIdf(1,3)_rec_real	TfIdf(1,3)_f1-sc	TfIdf(1,3)_time	TfIdf(1,4)_deep	TfIdf(1,4)_prec	TfIdf(1,4)_prec_fake	TfIdf(1,4)_prec_real	TfIdf(1,4)_rec	TfIdf(1,4)_rec_fake	TfIdf(1,4)_rec_real	TfIdf(1,4)_f1-sc	TfIdf(1,4)_time
0	1.0	0.75	0.7272727272727273	0.7704918032786885	0.7494026284348865	0.7407407407407407	0.7580645161290323	0.7490862982024316	1.7062087059020996	1.0	0.7758620689655172	0.7413793103448276	0.8103448275862069	0.7771804062126643	0.7962962962962963	0.7580645161290323	0.7755952380952381	6.7376508712768555	1.0	0.75	0.6811594202898551	0.851063829787234	0.7577658303464755	0.8703703703703703	0.6451612903225806	0.7490862982024316	10.81450605392456	1.0	0.8017241379310345	0.803921568627451	0.8	0.798984468339307	0.7592592592592593	0.8387096774193549	0.7999250093738284	12.911688327789307	1.0	0.5258620689655172	0.49122807017543857	0.559322033898305	0.5253882915173238	0.5185185185185185	0.532258064516129	0.524979524979525	11.631218433380127
1	1.0	0.7913043478260869	0.75	0.8305084745762712	0.7927350427350428	0.8076923076923077	0.7777777777777778	0.790528233151184	1.6509976387023926	1.0	0.7913043478260869	0.7258064516129032	0.8679245283018868	0.7977716727716728	0.8653846153846154	0.7301587301587301	0.7912885662431942	7.091504812240601	1.0	0.7478260869565218	0.6666666666666666	0.8695652173913043	0.7597680097680097	0.8846153846153846	0.6349206349206349	0.7471377663204185	10.410762786865234	1.0	0.7565217391304347	0.7	0.8181818181818182	0.760989010989011	0.8076923076923077	0.7142857142857143	0.7563559322033899	11.926637887954712	1.0	0.5739130434782609	0.6153846153846154	0.5686274509803921	0.5372405372405372	0.15384615384615385	0.9206349206349206	0.4745920745920746	12.103972434997559
2	1.0	0.782608695652174	0.74	0.8153846153846154	0.7790661719233147	0.7551020408163265	0.803030303030303	0.7783175264091294	1.647287368774414	1.0	0.8	0.7407407407407407	0.8524590163934426	0.8021026592455164	0.8163265306122449	0.7878787878787878	0.7977983334607447	6.528692722320557	1.0	0.8173913043478261	0.7258064516129032	0.9245283018867925	0.830395794681509	0.9183673469387755	0.7424242424242424	0.8171701112877584	10.441477060317993	1.0	0.7913043478260869	0.8048780487804879	0.7837837837837838	0.7761286332714904	0.673469387755102	0.8787878787878788	0.780952380952381	12.981924533843994	1.0	0.5217391304347826	0.47	0.8666666666666667	0.5780766852195424	0.9591836734693877	0.19696969696969696	0.47593006877123206	12.03148889541626
3	1.0	0.7652173913043478	0.8148148148148148	0.7213114754098361	0.7680631451123254	0.7213114754098361	0.8148148148148148	0.7652173913043478	1.4818329811096191	1.0	0.7913043478260869	0.8245614035087719	0.7586206896551724	0.7926533090467516	0.7704918032786885	0.8148148148148148	0.7911622276029056	6.412454843521118	1.0	0.7565217391304347	0.7538461538461538	0.76	0.7534911961141469	0.8032786885245902	0.7037037037037037	0.7542735042735043	9.751432418823242	1.0	0.7391304347826086	0.7818181818181819	0.7	0.7413479052823315	0.7049180327868853	0.7777777777777778	0.7391107078039927	11.880446434020996	1.0	0.6347826086956522	0.6792452830188679	0.5967741935483871	0.6376745598057074	0.5901639344262295	0.6851851851851852	0.6347549909255898	11.643215894699097
4	1.0	0.7913043478260869	0.84	0.7538461538461538	0.7918935269207501	0.7241379310344828	0.8596491228070176	0.7905282331511839	1.5853545665740967	1.0	0.782608695652174	0.8367346938775511	0.7424242424242424	0.7832728372655777	0.7068965517241379	0.8596491228070176	0.7815515538332953	6.274419069290161	1.0	0.6956521739130435	0.7017543859649122	0.6896551724137931	0.6957047791893527	0.6896551724137931	0.7017543859649122	0.6956521739130435	10.352376461029053	1.0	0.7478260869565218	0.8372093023255814	0.6944444444444444	0.7489413188142771	0.6206896551724138	0.8771929824561403	0.7440325427891626	11.885573863983154	1.0	0.5652173913043478	0.5416666666666666	0.6842105263157895	0.5623109497882638	0.896551724137931	0.22807017543859648	0.5087149692412851	11.569018602371216
5	1.0	0.7565217391304347	0.7704918032786885	0.7407407407407407	0.7556162720097146	0.7704918032786885	0.7407407407407407	0.7556162720097146	1.5166690349578857	1.0	0.7739130434782608	0.7777777777777778	0.7692307692307693	0.7720097146326654	0.8032786885245902	0.7407407407407407	0.7725197808886184	6.114867210388184	1.0	0.7304347826086957	0.7205882352941176	0.7446808510638298	0.7257134183363692	0.8032786885245902	0.6481481481481481	0.7263796147056567	10.60249924659729	1.0	0.7739130434782608	0.7966101694915254	0.75	0.7741347905282332	0.7704918032786885	0.7777777777777778	0.7734848484848486	11.572039127349854	1.0	0.5304347826086957	0.6521739130434783	0.5	0.5488767455980571	0.2459016393442623	0.8518518518518519	0.49363992172211346	11.956332921981812
6	1.0	0.7478260869565218	0.7424242424242424	0.7551020408163265	0.7442319368548878	0.8032786885245902	0.6851851851851852	0.7450500726244171	1.898134469985962	1.0	0.782608695652174	0.8333333333333334	0.7377049180327869	0.7855191256830601	0.7377049180327869	0.8333333333333334	0.782608695652174	6.787556886672974	1.0	0.7130434782608696	0.71875	0.7058823529411765	0.7103825136612021	0.7540983606557377	0.6666666666666666	0.7108571428571429	10.60898494720459	1.0	0.7652173913043478	0.7741935483870968	0.7547169811320755	0.76381299332119	0.7868852459016393	0.7407407407407407	0.764075678139959	12.391113042831421	1.0	0.6086956521739131	0.5769230769230769	0.9090909090909091	0.5843958712811171	0.9836065573770492	0.18518518518518517	0.5174825174825174	12.042839527130127
7	1.0	0.7565217391304347	0.7272727272727273	0.7833333333333333	0.7563907486305539	0.7547169811320755	0.7580645161290323	0.7556162720097146	1.6660611629486084	1.0	0.7130434782608696	0.6851851851851852	0.7377049180327869	0.7119598295800365	0.6981132075471698	0.7258064516129032	0.7116480510599499	7.093487024307251	1.0	0.7391304347826086	0.6575342465753424	0.8809523809523809	0.7512172854534389	0.9056603773584906	0.5967741935483871	0.7367216117216118	10.4303560256958	1.0	0.7130434782608696	0.6785714285714286	0.7457627118644068	0.7133292757151553	0.7169811320754716	0.7096774193548387	0.7122602168473728	12.190649032592773	1.0	0.6086956521739131	0.5645161290322581	0.660377358490566	0.6124467437614121	0.660377358490566	0.5645161290322581	0.6086956521739131	12.058964014053345
8	1.0	0.7043478260869566	0.7049180327868853	0.7037037037037037	0.7036924939467313	0.7288135593220338	0.6785714285714286	0.7037878787878787	1.5078973770141602	1.0	0.7739130434782608	0.7894736842105263	0.7586206896551724	0.7742130750605327	0.7627118644067796	0.7857142857142857	0.7738959467634603	7.426681756973267	1.0	0.808695652173913	0.7681159420289855	0.8695652173913043	0.8062953995157385	0.8983050847457628	0.7142857142857143	0.806219362745098	10.559934139251709	1.0	0.7304347826086957	0.7333333333333333	0.7272727272727273	0.7300242130750605	0.7457627118644068	0.7142857142857143	0.7301082595200243	11.691073417663574	1.0	0.6086956521739131	0.609375	0.6078431372549019	0.6072941888619855	0.6610169491525424	0.5535714285714286	0.6067927968999316	11.792036771774292
9	1.0	0.7739130434782608	0.8214285714285714	0.7288135593220338	0.7766281192939745	0.7419354838709677	0.8113207547169812	0.7737590799031477	1.643153429031372	1.0	0.782608695652174	0.8490566037735849	0.7258064516129032	0.7874315276932441	0.7258064516129032	0.8490566037735849	0.782608695652174	6.547162294387817	1.0	0.7913043478260869	0.7878787878787878	0.7959183673469388	0.7872793670115642	0.8387096774193549	0.7358490566037735	0.7886029411764706	10.398446798324585	1.0	0.6782608695652174	0.7192982456140351	0.6379310344827587	0.6797017650639074	0.6612903225806451	0.6981132075471698	0.6778711484593838	11.475776672363281	1.0	0.5391304347826087	0.7647058823529411	0.5	0.5671028606208156	0.20967741935483872	0.9245283018867925	0.4890602732835946	11.884952545166016
10	2.0	0.7586206896551724	0.7166666666666667	0.8035714285714286	0.7610513739545998	0.7962962962962963	0.7258064516129032	0.7585489146595301	1.7491328716278076	2.0	0.7931034482758621	0.7678571428571429	0.8166666666666667	0.7933094384707288	0.7962962962962963	0.7903225806451613	0.7925484351713861	6.574547529220581	2.0	0.75	0.6984126984126984	0.8113207547169812	0.7541816009557945	0.8148148148148148	0.6935483870967742	0.749981419546637	10.60550570487976	2.0	0.8017241379310345	0.803921568627451	0.8	0.798984468339307	0.7592592592592593	0.8387096774193549	0.7999250093738284	13.298764944076538	2.0	0.6206896551724138	0.5925925925925926	0.6451612903225806	0.6188769414575865	0.5925925925925926	0.6451612903225806	0.6188769414575865	12.641303539276123
11	2.0	0.7739130434782608	0.7241379310344828	0.8245614035087719	0.7768620268620269	0.8076923076923077	0.746031746031746	0.7734848484848484	1.717348337173462	2.0	0.7652173913043478	0.7272727272727273	0.8	0.7655677655677655	0.7692307692307693	0.7619047619047619	0.7640756781399589	6.605490207672119	2.0	0.7391304347826086	0.6571428571428571	0.8666666666666667	0.7518315018315018	0.8846153846153846	0.6190476190476191	0.73816029143898	10.768980503082275	2.0	0.808695652173913	0.7884615384615384	0.8253968253968254	0.806929181929182	0.7884615384615384	0.8253968253968254	0.806929181929182	12.06259298324585	2.0	0.6434782608695652	0.72	0.6222222222222222	0.6175213675213675	0.34615384615384615	0.8888888888888888	0.5997793056616586	12.708051204681396
12	2.0	0.7739130434782608	0.7169811320754716	0.8225806451612904	0.7741187384044527	0.7755102040816326	0.7727272727272727	0.7709865196078431	1.7036798000335693	2.0	0.7652173913043478	0.6896551724137931	0.8421052631578947	0.7717996289424861	0.8163265306122449	0.7272727272727273	0.764075678139959	6.41947865486145	2.0	0.8260869565217391	0.7301587301587301	0.9423076923076923	0.840599876314162	0.9387755102040817	0.7424242424242424	0.8259685230024213	11.26822304725647	2.0	0.7478260869565218	0.7	0.7846153846153846	0.7435064935064934	0.7142857142857143	0.7727272727272727	0.7428483306345902	12.476503849029541	2.0	0.6347826086956522	0.5573770491803278	0.7222222222222222	0.6423933209647495	0.6938775510204082	0.5909090909090909	0.634090909090909	12.633394718170166
13	2.0	0.782608695652174	0.8333333333333334	0.7377049180327869	0.7855191256830601	0.7377049180327869	0.8333333333333334	0.782608695652174	1.6052343845367432	2.0	0.8	0.8392857142857143	0.7627118644067796	0.8019125683060109	0.7704918032786885	0.8333333333333334	0.799939490204977	6.7671897411346436	2.0	0.7565217391304347	0.7619047619047619	0.75	0.7545537340619308	0.7868852459016393	0.7222222222222222	0.7550213024954351	10.373108863830566	2.0	0.7478260869565218	0.8076923076923077	0.6984126984126984	0.7516697024893746	0.6885245901639344	0.8148148148148148	0.7477497919975795	12.772825002670288	2.0	0.6956521739130435	0.7321428571428571	0.6610169491525424	0.6971766848816029	0.6721311475409836	0.7222222222222222	0.6955600937901822	12.102294445037842
14	2.0	0.7913043478260869	0.8269230769230769	0.7619047619047619	0.7917422867513612	0.7413793103448276	0.8421052631578947	0.7909090909090909	1.5986380577087402	2.0	0.7913043478260869	0.8541666666666666	0.746268656716418	0.7920447670901392	0.7068965517241379	0.8771929824561403	0.7900182592818015	6.51447319984436	2.0	0.7043478260869566	0.7068965517241379	0.7017543859649122	0.7043254688445251	0.7068965517241379	0.7017543859649122	0.7043254688445251	9.510471820831299	2.0	0.7391304347826086	0.78	0.7076923076923077	0.7397156684815487	0.6724137931034483	0.8070175438596491	0.73816029143898	11.990680456161499	2.0	0.6434782608695652	0.5977011494252874	0.7857142857142857	0.6412583182093163	0.896551724137931	0.38596491228070173	0.6174442190669371	12.170037031173706
15	2.0	0.7913043478260869	0.8135593220338984	0.7678571428571429	0.7915907710989678	0.7868852459016393	0.7962962962962963	0.790909090909091	1.5573756694793701	2.0	0.7565217391304347	0.7323943661971831	0.7954545454545454	0.7503035822707953	0.8524590163934426	0.6481481481481481	0.7510822510822511	6.349663496017456	2.0	0.7565217391304347	0.7538461538461538	0.76	0.7534911961141469	0.8032786885245902	0.7037037037037037	0.7542735042735043	10.059587478637695	2.0	0.808695652173913	0.8421052631578947	0.7758620689655172	0.8101092896174864	0.7868852459016393	0.8333333333333334	0.8085653753026634	11.389996528625488	2.0	0.5826086956521739	0.696969696969697	0.5365853658536586	0.5959319975713417	0.3770491803278688	0.8148148148148148	0.5682102628285357	12.459408521652222
16	2.0	0.7739130434782608	0.7692307692307693	0.78	0.7709471766848817	0.819672131147541	0.7222222222222222	0.771825396825397	1.9319360256195068	2.0	0.7565217391304347	0.7894736842105263	0.7241379310344828	0.7577413479052824	0.7377049180327869	0.7777777777777778	0.7563559322033899	6.692244529724121	2.0	0.7130434782608696	0.7	0.7333333333333333	0.7071948998178507	0.8032786885245902	0.6111111111111112	0.7073791348600509	10.119656562805176	2.0	0.7652173913043478	0.7833333333333333	0.7454545454545455	0.7648755312689739	0.7704918032786885	0.7592592592592593	0.7645765410569414	12.368324756622314	2.0	0.6260869565217392	0.8461538461538461	0.5617977528089888	0.643290831815422	0.36065573770491804	0.9259259259259259	0.6025239128687404	12.732540845870972
17	2.0	0.7652173913043478	0.76	0.7692307692307693	0.7617163724893488	0.7169811320754716	0.8064516129032258	0.7626328262365262	1.731416940689087	2.0	0.7130434782608696	0.6666666666666666	0.7636363636363637	0.7160681679853926	0.7547169811320755	0.6774193548387096	0.7129566598593148	6.633037567138672	2.0	0.7217391304347827	0.6438356164383562	0.8571428571428571	0.7337188070602556	0.8867924528301887	0.5806451612903226	0.7191697191697192	10.689850568771362	2.0	0.7304347826086957	0.7037037037037037	0.7540983606557377	0.7294583079732198	0.7169811320754716	0.7419354838709677	0.7291239267532863	12.308829069137573	2.0	0.6608695652173913	0.6060606060606061	0.7346938775510204	0.6676810712111991	0.7547169811320755	0.5806451612903226	0.6604587781058369	13.027335405349731
18	2.0	0.7130434782608696	0.7321428571428571	0.6949152542372882	0.7135290556900726	0.6949152542372882	0.7321428571428571	0.7130434782608696	1.5292928218841553	2.0	0.7391304347826086	0.7543859649122807	0.7241379310344828	0.7394067796610169	0.7288135593220338	0.75	0.7391107078039928	6.622504949569702	2.0	0.7913043478260869	0.7464788732394366	0.8636363636363636	0.7884382566585957	0.8983050847457628	0.6785714285714286	0.7876923076923077	11.071439981460571	2.0	0.7391304347826086	0.7457627118644068	0.7321428571428571	0.7389527845036319	0.7457627118644068	0.7321428571428571	0.7389527845036319	11.966604709625244	2.0	0.6782608695652174	0.6571428571428571	0.7111111111111111	0.6755447941888619	0.7796610169491526	0.5714285714285714	0.6734208304551386	12.633179903030396
19	2.0	0.7478260869565218	0.8113207547169812	0.6935483870967742	0.7524345709068777	0.6935483870967742	0.8113207547169812	0.7478260869565218	1.5971319675445557	2.0	0.7652173913043478	0.8301886792452831	0.7096774193548387	0.7699330493000609	0.7096774193548387	0.8301886792452831	0.7652173913043478	6.488691568374634	2.0	0.8260869565217391	0.8088235294117647	0.851063829787234	0.8209068776628119	0.8870967741935484	0.7547169811320755	0.8230769230769232	10.863432884216309	2.0	0.6695652173913044	0.7068965517241379	0.631578947368421	0.6702678027997565	0.6612903225806451	0.6792452830188679	0.668939393939394	10.90405797958374	2.0	0.6173913043478261	0.8	0.5529411764705883	0.6369446135118686	0.3870967741935484	0.8867924528301887	0.6014492753623188	12.50323748588562
20	3.0	0.7672413793103449	0.7213114754098361	0.8181818181818182	0.770310633213859	0.8148148148148148	0.7258064516129032	0.7672240802675585	1.734492301940918	3.0	0.7931034482758621	0.75	0.8392857142857143	0.7956989247311828	0.8333333333333334	0.7580645161290323	0.7930419268510258	6.606268644332886	3.0	0.7413793103448276	0.6875	0.8076923076923077	0.7461170848267622	0.8148148148148148	0.6774193548387096	0.7413024085637823	10.373029470443726	3.0	0.8362068965517241	0.8070175438596491	0.864406779661017	0.8372162485065711	0.8518518518518519	0.8225806451612904	0.8359020177201995	12.84462594985962	3.0	0.6896551724137931	0.6666666666666666	0.7096774193548387	0.6881720430107527	0.6666666666666666	0.7096774193548387	0.6881720430107527	13.42332911491394
21	3.0	0.8	0.7843137254901961	0.8125	0.7973137973137974	0.7692307692307693	0.8253968253968254	0.7977983334607446	1.649334192276001	3.0	0.782608695652174	0.7368421052631579	0.8275862068965517	0.7847985347985348	0.8076923076923077	0.7619047619047619	0.7820153157934644	6.973729372024536	3.0	0.7391304347826086	0.6571428571428571	0.8666666666666667	0.7518315018315018	0.8846153846153846	0.6190476190476191	0.73816029143898	11.464747190475464	3.0	0.7652173913043478	0.7450980392156863	0.78125	0.7622100122100122	0.7307692307692307	0.7936507936507936	0.7626328262365263	12.190640926361084	3.0	0.6695652173913044	0.6029411764705882	0.7659574468085106	0.679945054945055	0.7884615384615384	0.5714285714285714	0.668939393939394	12.937828540802002
22	3.0	0.808695652173913	0.7872340425531915	0.8235294117647058	0.8017934446505874	0.7551020408163265	0.8484848484848485	0.8033271144278606	1.6042633056640625	3.0	0.7913043478260869	0.7192982456140351	0.8620689655172413	0.7971552257266543	0.8367346938775511	0.7575757575757576	0.7900182592818015	6.630617618560791	3.0	0.8173913043478261	0.71875	0.9411764705882353	0.8330241187384044	0.9387755102040817	0.7272727272727273	0.8173360562741093	10.983326196670532	3.0	0.7913043478260869	0.7777777777777778	0.8	0.7813852813852814	0.7142857142857143	0.8484848484848485	0.7841051314142679	13.875970125198364	3.0	0.7478260869565218	0.6785714285714286	0.8135593220338984	0.75139146567718	0.7755102040816326	0.7272727272727273	0.7459047619047618	12.66481614112854
23	3.0	0.7913043478260869	0.8490566037735849	0.7419354838709677	0.7947783849423193	0.7377049180327869	0.8518518518518519	0.7912885662431942	1.4634466171264648	3.0	0.8	0.8392857142857143	0.7627118644067796	0.8019125683060109	0.7704918032786885	0.8333333333333334	0.799939490204977	6.539393901824951	3.0	0.7478260869565218	0.7424242424242424	0.7551020408163265	0.7442319368548878	0.8032786885245902	0.6851851851851852	0.7450500726244171	10.436383962631226	3.0	0.7043478260869566	0.7368421052631579	0.6724137931034483	0.7053734061930783	0.6885245901639344	0.7222222222222222	0.7041464891041161	12.720224618911743	3.0	0.7304347826086957	0.7678571428571429	0.6949152542372882	0.7320886460230722	0.7049180327868853	0.7592592592592593	0.7303532259284472	12.770896673202515
24	3.0	0.808695652173913	0.8333333333333334	0.7868852459016393	0.808983666061706	0.7758620689655172	0.8421052631578947	0.8085653753026634	1.5948691368103027	3.0	0.7652173913043478	0.7924528301886793	0.7419354838709677	0.7655777374470659	0.7241379310344828	0.8070175438596491	0.7649330002271177	6.649407625198364	3.0	0.6956521739130435	0.6949152542372882	0.6964285714285714	0.6955535390199636	0.7068965517241379	0.6842105263157895	0.6955600937901822	10.761946439743042	3.0	0.7565217391304347	0.7777777777777778	0.7377049180327869	0.7568058076225046	0.7241379310344828	0.7894736842105263	0.7563559322033899	12.108286619186401	3.0	0.591304347826087	0.6	0.5833333333333334	0.5915003024803388	0.5689655172413793	0.6140350877192983	0.5911806973753877	12.671155214309692
25	3.0	0.7739130434782608	0.7868852459016393	0.7592592592592593	0.7730722525804493	0.7868852459016393	0.7592592592592593	0.7730722525804492	1.5134692192077637	3.0	0.7478260869565218	0.7424242424242424	0.7551020408163265	0.7442319368548878	0.8032786885245902	0.6851851851851852	0.7450500726244171	6.241179943084717	3.0	0.7304347826086957	0.7142857142857143	0.7555555555555555	0.7246508803885854	0.819672131147541	0.6296296296296297	0.7251137327473205	10.447469711303711	3.0	0.7913043478260869	0.8363636363636363	0.75	0.7937158469945356	0.7540983606557377	0.8333333333333334	0.7912885662431941	11.50393557548523	3.0	0.6521739130434783	0.6567164179104478	0.6458333333333334	0.6476927747419551	0.7213114754098361	0.5740740740740741	0.647671568627451	12.72239375114441
26	3.0	0.7739130434782608	0.7966101694915254	0.75	0.7741347905282332	0.7704918032786885	0.7777777777777778	0.7734848484848486	1.9044122695922852	3.0	0.8	0.8392857142857143	0.7627118644067796	0.8019125683060109	0.7704918032786885	0.8333333333333334	0.799939490204977	6.777214527130127	3.0	0.7043478260869566	0.7213114754098361	0.6851851851851852	0.7032483302975107	0.7213114754098361	0.6851851851851852	0.7032483302975108	10.376910924911499	3.0	0.7739130434782608	0.7868852459016393	0.7592592592592593	0.7730722525804493	0.7868852459016393	0.7592592592592593	0.7730722525804492	12.561075448989868	3.0	0.7043478260869566	0.8648648648648649	0.6282051282051282	0.7159987856709169	0.5245901639344263	0.9074074074074074	0.6977427334570191	12.455092430114746
27	3.0	0.7739130434782608	0.7454545454545455	0.8	0.7738892270237371	0.7735849056603774	0.7741935483870968	0.7730722525804493	1.6480348110198975	3.0	0.7130434782608696	0.6785714285714286	0.7457627118644068	0.7133292757151553	0.7169811320754716	0.7096774193548387	0.7122602168473728	6.456977605819702	3.0	0.7391304347826086	0.6619718309859155	0.8636363636363636	0.7498478393183201	0.8867924528301887	0.6129032258064516	0.737522824102252	10.647298812866211	3.0	0.7130434782608696	0.6724137931034483	0.7543859649122807	0.7146987218502738	0.7358490566037735	0.6935483870967742	0.7126958891664774	12.596935272216797	3.0	0.6260869565217392	0.5757575757575758	0.6938775510204082	0.6326841144248325	0.7169811320754716	0.5483870967741935	0.6256340373987432	13.298995971679688
28	3.0	0.7217391304347827	0.7288135593220338	0.7142857142857143	0.7215496368038741	0.7288135593220338	0.7142857142857143	0.7215496368038741	1.517028570175171	3.0	0.7130434782608696	0.7321428571428571	0.6949152542372882	0.7135290556900726	0.6949152542372882	0.7321428571428571	0.7130434782608696	6.690268516540527	3.0	0.8	0.75	0.8837209302325582	0.7969128329297821	0.9152542372881356	0.6785714285714286	0.796052124296399	10.582945346832275	3.0	0.7217391304347827	0.7213114754098361	0.7222222222222222	0.7210956416464891	0.7457627118644068	0.6964285714285714	0.7212121212121212	11.672509670257568	3.0	0.6782608695652174	0.6617647058823529	0.7021276595744681	0.6759987893462469	0.7627118644067796	0.5892857142857143	0.6747190581759803	13.161297082901001
29	3.0	0.7304347826086957	0.803921568627451	0.671875	0.7363055386488131	0.6612903225806451	0.8113207547169812	0.7303532259284471	1.5631237030029297	3.0	0.7652173913043478	0.8070175438596491	0.7241379310344828	0.7671941570298235	0.7419354838709677	0.7924528301886793	0.7649330002271177	6.671448230743408	3.0	0.8173913043478261	0.7971014492753623	0.8478260869565217	0.811472915398661	0.8870967741935484	0.7358490566037735	0.8137867221836688	10.898292541503906	3.0	0.7130434782608696	0.7543859649122807	0.6724137931034483	0.7146987218502738	0.6935483870967742	0.7358490566037735	0.7126958891664774	11.601676940917969	3.0	0.7304347826086957	0.7313432835820896	0.7291666666666666	0.7253499695678636	0.7903225806451613	0.660377358490566	0.7263796147056567	13.604243993759155
30	4.0	0.7327586206896551	0.7090909090909091	0.7540983606557377	0.7320788530465949	0.7222222222222222	0.7419354838709677	0.7317819049750129	1.6926836967468262	4.0	0.7758620689655172	0.75	0.8	0.7759856630824373	0.7777777777777778	0.7741935483870968	0.7752608047690015	6.577057838439941	4.0	0.7327586206896551	0.676923076923077	0.803921568627451	0.73805256869773	0.8148148148148148	0.6612903225806451	0.7325797575667434	10.607078075408936	4.0	0.8362068965517241	0.8723404255319149	0.8115942028985508	0.831242532855436	0.7592592592592593	0.9032258064516129	0.8334215100899403	12.887511730194092	4.0	0.7241379310344828	0.7037037037037037	0.7419354838709677	0.7228195937873357	0.7037037037037037	0.7419354838709677	0.7228195937873357	13.994715929031372
31	4.0	0.8	0.7543859649122807	0.8448275862068966	0.8023504273504274	0.8269230769230769	0.7777777777777778	0.7994540905299872	1.5656299591064453	4.0	0.7913043478260869	0.7413793103448276	0.8421052631578947	0.7944139194139194	0.8269230769230769	0.7619047619047619	0.7909090909090909	6.599720478057861	4.0	0.7304347826086957	0.647887323943662	0.8636363636363636	0.7438949938949939	0.8846153846153846	0.6031746031746031	0.7291239267532862	10.474198341369629	4.0	0.7652173913043478	0.7358490566037735	0.7903225806451613	0.7638888888888888	0.75	0.7777777777777778	0.7634285714285713	12.15645718574524	4.0	0.7565217391304347	0.6875	0.8431372549019608	0.7643467643467643	0.8461538461538461	0.6825396825396826	0.7565033272837265	15.322490692138672
32	4.0	0.8260869565217391	0.7843137254901961	0.859375	0.8248299319727892	0.8163265306122449	0.8333333333333334	0.823076923076923	1.386291742324829	4.0	0.7739130434782608	0.7017543859649122	0.8448275862068966	0.7793753865182437	0.8163265306122449	0.7424242424242424	0.7725197808886184	6.729797124862671	4.0	0.8173913043478261	0.71875	0.9411764705882353	0.8330241187384044	0.9387755102040817	0.7272727272727273	0.8173360562741093	10.901155471801758	4.0	0.7739130434782608	0.7674418604651163	0.7777777777777778	0.7609771181199753	0.673469387755102	0.8484848484848485	0.7644927536231882	13.083426475524902	4.0	0.782608695652174	0.7222222222222222	0.8360655737704918	0.7843228200371057	0.7959183673469388	0.7727272727272727	0.7802155798486354	13.616185665130615
33	4.0	0.7739130434782608	0.8431372549019608	0.71875	0.7783849423193685	0.7049180327868853	0.8518518518518519	0.7737590799031477	1.448892593383789	4.0	0.8	0.8518518518518519	0.7540983606557377	0.8029751062537948	0.7540983606557377	0.8518518518518519	0.7999999999999999	6.603130102157593	4.0	0.7391304347826086	0.7384615384615385	0.74	0.7360352155434122	0.7868852459016393	0.6851851851851852	0.7367216117216117	10.500163316726685	4.0	0.7130434782608696	0.7413793103448276	0.6842105263157895	0.7135701275045537	0.7049180327868853	0.7222222222222222	0.7126958891664774	11.384215593338013	4.0	0.7043478260869566	0.7288135593220338	0.6785714285714286	0.7043108682452945	0.7049180327868853	0.7037037037037037	0.7037878787878787	13.36852741241455
34	4.0	0.7739130434782608	0.8076923076923077	0.746031746031746	0.7743496672716274	0.7241379310344828	0.8245614035087719	0.7734848484848484	1.578094482421875	4.0	0.7478260869565218	0.8222222222222222	0.7	0.7487900786448881	0.6379310344827587	0.8596491228070176	0.7450500726244171	6.771034240722656	4.0	0.6956521739130435	0.6949152542372882	0.6964285714285714	0.6955535390199636	0.7068965517241379	0.6842105263157895	0.6955600937901822	10.57009506225586	4.0	0.7043478260869566	0.7307692307692307	0.6825396825396826	0.704779189352692	0.6551724137931034	0.7543859649122807	0.7037878787878789	12.387985467910767	4.0	0.6173913043478261	0.625	0.6101694915254238	0.617513611615245	0.603448275862069	0.631578947368421	0.617362371445856	13.089250326156616
35	4.0	0.8260869565217391	0.8360655737704918	0.8148148148148148	0.8254401942926533	0.8360655737704918	0.8148148148148148	0.8254401942926533	1.520338535308838	4.0	0.7478260869565218	0.7285714285714285	0.7777777777777778	0.74210686095932	0.8360655737704918	0.6481481481481481	0.7428483306345901	6.750853538513184	4.0	0.7565217391304347	0.7391304347826086	0.782608695652174	0.7513661202185793	0.8360655737704918	0.6666666666666666	0.7523076923076923	10.146783828735352	4.0	0.7652173913043478	0.7931034482758621	0.7368421052631579	0.7659380692167577	0.7540983606557377	0.7777777777777778	0.7649330002271177	11.446414947509766	4.0	0.6260869565217392	0.7142857142857143	0.5753424657534246	0.6347905282331512	0.4918032786885246	0.7777777777777778	0.6219707973396529	12.78541874885559
36	4.0	0.7391304347826086	0.7627118644067796	0.7142857142857143	0.7392228293867638	0.7377049180327869	0.7407407407407407	0.7386363636363638	1.9281220436096191	4.0	0.7913043478260869	0.8490566037735849	0.7419354838709677	0.7947783849423193	0.7377049180327869	0.8518518518518519	0.7912885662431942	6.07012414932251	4.0	0.6782608695652174	0.6818181818181818	0.673469387755102	0.6744080145719491	0.7377049180327869	0.6111111111111112	0.6747190581759803	9.873717069625854	4.0	0.8173913043478261	0.8448275862068966	0.7894736842105263	0.8183060109289617	0.8032786885245902	0.8333333333333334	0.8171701112877584	12.287888765335083	4.0	0.8434782608695652	0.8524590163934426	0.8333333333333334	0.842896174863388	0.8524590163934426	0.8333333333333334	0.842896174863388	13.656636476516724
37	4.0	0.7565217391304347	0.7192982456140351	0.7931034482758621	0.7577601947656726	0.7735849056603774	0.7419354838709677	0.7560606060606061	1.6788463592529297	4.0	0.6869565217391305	0.6440677966101694	0.7321428571428571	0.6891357273280584	0.7169811320754716	0.6612903225806451	0.6867433414043582	6.47072696685791	4.0	0.7478260869565218	0.6714285714285714	0.8666666666666667	0.7579123554473524	0.8867924528301887	0.6290322580645161	0.7465998024466226	10.947410821914673	4.0	0.7304347826086957	0.7037037037037037	0.7540983606557377	0.7294583079732198	0.7169811320754716	0.7419354838709677	0.7291239267532863	12.88709282875061	4.0	0.6782608695652174	0.6212121212121212	0.7551020408163265	0.6851795496043822	0.7735849056603774	0.5967741935483871	0.6778711484593838	13.208768606185913
38	4.0	0.7304347826086957	0.7258064516129032	0.7358490566037735	0.7295702179176755	0.7627118644067796	0.6964285714285714	0.7296989915838956	1.4944958686828613	4.0	0.7652173913043478	0.7758620689655172	0.7543859649122807	0.7652845036319613	0.7627118644067796	0.7678571428571429	0.7651463580667122	6.099748373031616	4.0	0.7652173913043478	0.7162162162162162	0.8536585365853658	0.7616525423728814	0.8983050847457628	0.625	0.7593209828695451	10.460326194763184	4.0	0.7304347826086957	0.7258064516129032	0.7358490566037735	0.7295702179176755	0.7627118644067796	0.6964285714285714	0.7296989915838956	11.727264165878296	4.0	0.6260869565217392	0.6111111111111112	0.6511627906976745	0.6228813559322034	0.7457627118644068	0.5	0.6187061454237026	13.769701719284058
39	4.0	0.7652173913043478	0.8181818181818182	0.7166666666666667	0.7685636031649422	0.7258064516129032	0.8113207547169812	0.765146358066712	1.5704729557037354	4.0	0.782608695652174	0.8363636363636363	0.7333333333333333	0.7860620815581254	0.7419354838709677	0.8301886792452831	0.7825429241358445	5.467074871063232	4.0	0.8	0.7910447761194029	0.8125	0.7953438831405965	0.8548387096774194	0.7358490566037735	0.7969913270396807	10.683430433273315	4.0	0.7391304347826086	0.7580645161290323	0.7169811320754716	0.737522824102252	0.7580645161290323	0.7169811320754716	0.737522824102252	11.45452094078064	4.0	0.7304347826086957	0.7066666666666667	0.775	0.7198721850273889	0.8548387096774194	0.5849056603773585	0.7201946472019465	13.974342346191406
40	5.0	0.7844827586206896	0.7457627118644068	0.8245614035087719	0.7864396654719235	0.8148148148148148	0.7580645161290323	0.7843385141667286	1.6818249225616455	5.0	0.7672413793103449	0.7454545454545455	0.7868852459016393	0.766726403823178	0.7592592592592593	0.7741935483870968	0.7663906914298502	6.912891626358032	5.0	0.7758620689655172	0.7121212121212122	0.86	0.7819593787335724	0.8703703703703703	0.6935483870967742	0.775595238095238	9.410710573196411	5.0	0.7672413793103449	0.7368421052631579	0.7966101694915254	0.7679211469534051	0.7777777777777778	0.7580645161290323	0.766808130444494	13.094627380371094	5.0	0.7327586206896551	0.7017543859649122	0.7627118644067796	0.733273596176822	0.7407407407407407	0.7258064516129032	0.7322611868066413	13.826305866241455
41	5.0	0.7565217391304347	0.7	0.8181818181818182	0.760989010989011	0.8076923076923077	0.7142857142857143	0.7563559322033899	1.6698813438415527	5.0	0.782608695652174	0.7142857142857143	0.8653846153846154	0.7898351648351649	0.8653846153846154	0.7142857142857143	0.7826086956521738	6.613758563995361	5.0	0.7478260869565218	0.6666666666666666	0.8695652173913043	0.7597680097680097	0.8846153846153846	0.6349206349206349	0.7471377663204185	9.59083342552185	5.0	0.7739130434782608	0.7407407407407407	0.8032786885245902	0.7735042735042735	0.7692307692307693	0.7777777777777778	0.7725197808886184	12.305867433547974	5.0	0.7652173913043478	0.7049180327868853	0.8333333333333334	0.7706043956043955	0.8269230769230769	0.7142857142857143	0.7651463580667119	14.446935653686523
42	5.0	0.7913043478260869	0.7450980392156863	0.828125	0.7892702535559678	0.7755102040816326	0.803030303030303	0.7876923076923077	1.6009280681610107	5.0	0.808695652173913	0.7454545454545455	0.8666666666666667	0.8123067408781695	0.8367346938775511	0.7878787878787878	0.806929181929182	6.492481470108032	5.0	0.7913043478260869	0.6923076923076923	0.92	0.8076685219542363	0.9183673469387755	0.696969696969697	0.7912885662431941	11.234261989593506	5.0	0.7652173913043478	0.7115384615384616	0.8095238095238095	0.7639146567717996	0.7551020408163265	0.7727272727272727	0.7616854708726687	13.063127040863037	5.0	0.7652173913043478	0.7115384615384616	0.8095238095238095	0.7639146567717996	0.7551020408163265	0.7727272727272727	0.7616854708726687	14.23229193687439
43	5.0	0.7913043478260869	0.8363636363636363	0.75	0.7937158469945356	0.7540983606557377	0.8333333333333334	0.7912885662431941	1.5532004833221436	5.0	0.7739130434782608	0.8181818181818182	0.7333333333333333	0.7762598664238008	0.7377049180327869	0.8148148148148148	0.7738959467634603	5.975944757461548	5.0	0.7478260869565218	0.75	0.7450980392156863	0.7452944748026715	0.7868852459016393	0.7037037037037037	0.745904761904762	10.065444231033325	5.0	0.7391304347826086	0.7627118644067796	0.7142857142857143	0.7392228293867638	0.7377049180327869	0.7407407407407407	0.7386363636363638	12.4517982006073	5.0	0.7391304347826086	0.7627118644067796	0.7142857142857143	0.7392228293867638	0.7377049180327869	0.7407407407407407	0.7386363636363638	14.095187664031982
44	5.0	0.7913043478260869	0.8269230769230769	0.7619047619047619	0.7917422867513612	0.7413793103448276	0.8421052631578947	0.7909090909090909	1.580152988433838	5.0	0.7565217391304347	0.8260869565217391	0.7101449275362319	0.7574107683000605	0.6551724137931034	0.8596491228070176	0.7542735042735043	5.602229595184326	5.0	0.7130434782608696	0.7049180327868853	0.7222222222222222	0.7127949183303086	0.7413793103448276	0.6842105263157895	0.7126958891664774	10.510786056518555	5.0	0.808695652173913	0.8214285714285714	0.7966101694915254	0.808832425892317	0.7931034482758621	0.8245614035087719	0.808681185722928	12.022194623947144	5.0	0.6782608695652174	0.6721311475409836	0.6851851851851852	0.6780096793708409	0.7068965517241379	0.6491228070175439	0.6778711484593837	13.760974168777466
45	5.0	0.8	0.796875	0.803921568627451	0.7976624165148756	0.8360655737704918	0.7592592592592593	0.7984761904761905	1.518540382385254	5.0	0.7652173913043478	0.75	0.7872340425531915	0.7606253794778386	0.8360655737704918	0.6851851851851852	0.7616854708726687	5.812278509140015	5.0	0.7478260869565218	0.7424242424242424	0.7551020408163265	0.7442319368548878	0.8032786885245902	0.6851851851851852	0.7450500726244171	10.580957889556885	5.0	0.7739130434782608	0.8070175438596491	0.7413793103448276	0.775197328476017	0.7540983606557377	0.7962962962962963	0.7737590799031477	11.520352840423584	5.0	0.6347826086956522	0.7435897435897436	0.5789473684210527	0.6451123254401943	0.47540983606557374	0.8148148148148148	0.6284615384615384	13.66871690750122
46	5.0	0.8260869565217391	0.8153846153846154	0.84	0.8233151183970856	0.8688524590163934	0.7777777777777778	0.8244810744810744	1.8991279602050781	5.0	0.782608695652174	0.8103448275862069	0.7543859649122807	0.7833940497874924	0.7704918032786885	0.7962962962962963	0.7823453705806647	6.7877678871154785	5.0	0.7130434782608696	0.7121212121212122	0.7142857142857143	0.7093199757134183	0.7704918032786885	0.6481481481481481	0.7098845654001987	10.83875584602356	5.0	0.782608695652174	0.8	0.7636363636363637	0.7823315118397085	0.7868852459016393	0.7777777777777778	0.7820153157934643	12.436269044876099	5.0	0.8434782608695652	0.864406779661017	0.8214285714285714	0.8439587128111719	0.8360655737704918	0.8518518518518519	0.8431818181818183	13.703274250030518
47	5.0	0.7391304347826086	0.7169811320754716	0.7580645161290323	0.737522824102252	0.7169811320754716	0.7580645161290323	0.737522824102252	1.693204402923584	5.0	0.7217391304347827	0.6909090909090909	0.75	0.7213937918441875	0.7169811320754716	0.7258064516129032	0.7207043108682454	6.601335287094116	5.0	0.7478260869565218	0.6714285714285714	0.8666666666666667	0.7579123554473524	0.8867924528301887	0.6290322580645161	0.7465998024466226	10.77143931388855	5.0	0.7391304347826086	0.7254901960784313	0.75	0.7361533779671332	0.6981132075471698	0.7741935483870968	0.7367216117216117	13.02161979675293	5.0	0.6782608695652174	0.6290322580645161	0.7358490566037735	0.6824406573341448	0.7358490566037735	0.6290322580645161	0.6782608695652174	14.414349555969238
48	5.0	0.7391304347826086	0.7543859649122807	0.7241379310344828	0.7394067796610169	0.7288135593220338	0.75	0.7391107078039928	1.5254461765289307	5.0	0.7652173913043478	0.7857142857142857	0.7457627118644068	0.7657384987893463	0.7457627118644068	0.7857142857142857	0.7652173913043477	6.596916913986206	5.0	0.8	0.75	0.8837209302325582	0.7969128329297821	0.9152542372881356	0.6785714285714286	0.796052124296399	11.2167329788208	5.0	0.7217391304347827	0.7288135593220338	0.7142857142857143	0.7215496368038741	0.7288135593220338	0.7142857142857143	0.7215496368038741	11.746872425079346	5.0	0.6782608695652174	0.6666666666666666	0.6938775510204082	0.6764527845036319	0.7457627118644068	0.6071428571428571	0.6758095238095237	14.501849889755249
49	5.0	0.7739130434782608	0.8333333333333334	0.7213114754098361	0.7779975654290932	0.7258064516129032	0.8301886792452831	0.7738959467634603	1.5423460006713867	5.0	0.7739130434782608	0.8214285714285714	0.7288135593220338	0.7766281192939745	0.7419354838709677	0.8113207547169812	0.7737590799031477	7.056002855300903	5.0	0.8173913043478261	0.7971014492753623	0.8478260869565217	0.811472915398661	0.8870967741935484	0.7358490566037735	0.8137867221836688	10.517693996429443	5.0	0.7478260869565218	0.7796610169491526	0.7142857142857143	0.7483262325015216	0.7419354838709677	0.7547169811320755	0.7471377663204186	11.903267621994019	5.0	0.7043478260869566	0.71875	0.6862745098039216	0.7011564211807668	0.7419354838709677	0.660377358490566	0.7016178266178267	14.304205179214478
50	6.0	0.7586206896551724	0.7321428571428571	0.7833333333333333	0.7586618876941458	0.7592592592592593	0.7580645161290323	0.7579731743666169	1.668036699295044	6.0	0.7758620689655172	0.7413793103448276	0.8103448275862069	0.7771804062126643	0.7962962962962963	0.7580645161290323	0.7755952380952381	6.6284098625183105	6.0	0.7068965517241379	0.6470588235294118	0.7916666666666666	0.7138590203106332	0.8148148148148148	0.6129032258064516	0.7061102831594634	10.921834945678711	6.0	0.8017241379310345	0.8163265306122449	0.7910447761194029	0.79778972520908	0.7407407407407407	0.8548387096774194	0.7992022277414015	14.212700843811035	6.0	0.7241379310344828	0.6964285714285714	0.75	0.7240143369175627	0.7222222222222222	0.7258064516129032	0.723397913561848	14.36428689956665
51	6.0	0.782608695652174	0.7368421052631579	0.8275862068965517	0.7847985347985348	0.8076923076923077	0.7619047619047619	0.7820153157934644	1.658130168914795	6.0	0.8	0.7377049180327869	0.8703703703703703	0.8057081807081807	0.8653846153846154	0.746031746031746	0.799939490204977	6.258615970611572	6.0	0.7652173913043478	0.6865671641791045	0.875	0.7756410256410255	0.8846153846153846	0.6666666666666666	0.7649330002271179	10.809588193893433	6.0	0.7739130434782608	0.7321428571428571	0.8135593220338984	0.7751831501831501	0.7884615384615384	0.7619047619047619	0.7730722525804492	12.14884328842163	6.0	0.782608695652174	0.7368421052631579	0.8275862068965517	0.7847985347985348	0.8076923076923077	0.7619047619047619	0.7820153157934644	14.424161672592163
52	6.0	0.8260869565217391	0.8085106382978723	0.8382352941176471	0.8195732838589982	0.7755102040816326	0.8636363636363636	0.8212064676616915	1.609140157699585	6.0	0.7652173913043478	0.6896551724137931	0.8421052631578947	0.7717996289424861	0.8163265306122449	0.7272727272727273	0.764075678139959	5.553576469421387	6.0	0.8	0.696969696969697	0.9387755102040817	0.8178726035868893	0.9387755102040817	0.696969696969697	0.8000000000000002	10.983579397201538	6.0	0.7913043478260869	0.7659574468085106	0.8088235294117647	0.7840136054421769	0.7346938775510204	0.8333333333333334	0.7854477611940298	13.140423059463501	6.0	0.782608695652174	0.75	0.8059701492537313	0.7764378478664193	0.7346938775510204	0.8181818181818182	0.7771490582125418	14.103296279907227
53	6.0	0.8	0.8653846153846154	0.746031746031746	0.8040376442015786	0.7377049180327869	0.8703703703703703	0.799939490204977	1.5006484985351562	6.0	0.782608695652174	0.8333333333333334	0.7377049180327869	0.7855191256830601	0.7377049180327869	0.8333333333333334	0.782608695652174	5.499344110488892	6.0	0.7391304347826086	0.7384615384615385	0.74	0.7360352155434122	0.7868852459016393	0.6851851851851852	0.7367216117216117	10.002992391586304	6.0	0.7391304347826086	0.803921568627451	0.6875	0.7434729811778992	0.6721311475409836	0.8148148148148148	0.7389527845036319	12.339251518249512	6.0	0.7304347826086957	0.7586206896551724	0.7017543859649122	0.7310261080752884	0.7213114754098361	0.7407407407407407	0.7301082595200241	13.05424451828003
54	6.0	0.782608695652174	0.8113207547169812	0.7580645161290323	0.7829703569267998	0.7413793103448276	0.8245614035087719	0.7823453705806647	1.5889742374420166	6.0	0.7565217391304347	0.7884615384615384	0.7301587301587301	0.7569570477918934	0.7068965517241379	0.8070175438596491	0.7560606060606061	5.783563137054443	6.0	0.6695652173913044	0.6923076923076923	0.6507936507936508	0.6699939503932244	0.6206896551724138	0.7192982456140351	0.668939393939394	10.421997547149658	6.0	0.7652173913043478	0.8297872340425532	0.7205882352941176	0.766031457955233	0.6724137931034483	0.8596491228070176	0.7634285714285713	11.721149206161499	6.0	0.7739130434782608	0.75	0.803921568627451	0.7734422262552934	0.8275862068965517	0.7192982456140351	0.7730722525804493	14.535726308822632
55	6.0	0.782608695652174	0.8103448275862069	0.7543859649122807	0.7833940497874924	0.7704918032786885	0.7962962962962963	0.7823453705806647	1.527038335800171	6.0	0.7652173913043478	0.75	0.7872340425531915	0.7606253794778386	0.8360655737704918	0.6851851851851852	0.7616854708726687	5.415971994400024	6.0	0.7391304347826086	0.7313432835820896	0.75	0.7349726775956285	0.8032786885245902	0.6666666666666666	0.7357536764705883	10.773271083831787	6.0	0.7913043478260869	0.8245614035087719	0.7586206896551724	0.7926533090467516	0.7704918032786885	0.8148148148148148	0.7911622276029056	11.333980083465576	6.0	0.7130434782608696	0.7413793103448276	0.6842105263157895	0.7135701275045537	0.7049180327868853	0.7222222222222222	0.7126958891664774	14.332911968231201
56	6.0	0.7913043478260869	0.7936507936507936	0.7884615384615384	0.7894656952034002	0.819672131147541	0.7592592592592593	0.7900182592818016	1.897019386291504	6.0	0.7652173913043478	0.8035714285714286	0.7288135593220338	0.7670006071645417	0.7377049180327869	0.7962962962962963	0.7651463580667122	5.709429979324341	6.0	0.7043478260869566	0.7014925373134329	0.7083333333333334	0.700060716454159	0.7704918032786885	0.6296296296296297	0.7005208333333334	10.257975816726685	6.0	0.7913043478260869	0.8135593220338984	0.7678571428571429	0.7915907710989678	0.7868852459016393	0.7962962962962963	0.790909090909091	12.77278995513916	6.0	0.8521739130434782	0.8928571428571429	0.8135593220338984	0.8542805100182149	0.819672131147541	0.8888888888888888	0.8521291884123743	14.741508722305298
57	6.0	0.7739130434782608	0.7647058823529411	0.78125	0.7711503347534996	0.7358490566037735	0.8064516129032258	0.7718253968253967	1.7422678470611572	6.0	0.7130434782608696	0.6724137931034483	0.7543859649122807	0.7146987218502738	0.7358490566037735	0.6935483870967742	0.7126958891664774	6.477020978927612	6.0	0.7478260869565218	0.6714285714285714	0.8666666666666667	0.7579123554473524	0.8867924528301887	0.6290322580645161	0.7465998024466226	11.062209606170654	6.0	0.7130434782608696	0.6785714285714286	0.7457627118644068	0.7133292757151553	0.7169811320754716	0.7096774193548387	0.7122602168473728	12.664855480194092	6.0	0.7217391304347827	0.6666666666666666	0.7884615384615384	0.7268715763846623	0.7924528301886793	0.6612903225806451	0.7217180883242589	13.878574132919312
58	6.0	0.7478260869565218	0.75	0.7454545454545455	0.7474273607748183	0.7627118644067796	0.7321428571428571	0.747520629873571	1.5679595470428467	6.0	0.7304347826086957	0.7413793103448276	0.7192982456140351	0.7304782082324455	0.7288135593220338	0.7321428571428571	0.7303532259284471	6.75847601890564	6.0	0.808695652173913	0.7681159420289855	0.8695652173913043	0.8062953995157385	0.8983050847457628	0.7142857142857143	0.806219362745098	10.483365058898926	6.0	0.7043478260869566	0.7049180327868853	0.7037037037037037	0.7036924939467313	0.7288135593220338	0.6785714285714286	0.7037878787878787	11.749280214309692	6.0	0.7130434782608696	0.6911764705882353	0.7446808510638298	0.7108050847457628	0.7966101694915254	0.625	0.7098845654001987	14.288713216781616
59	6.0	0.7913043478260869	0.8518518518518519	0.7377049180327869	0.7954960438222763	0.7419354838709677	0.8490566037735849	0.7912885662431942	1.5863277912139893	6.0	0.7565217391304347	0.8035714285714286	0.711864406779661	0.7591296409007913	0.7258064516129032	0.7924528301886793	0.7563559322033899	5.715052843093872	6.0	0.782608695652174	0.7681159420289855	0.8043478260869565	0.7764759586122946	0.8548387096774194	0.6981132075471698	0.7783175264091294	10.354870319366455	6.0	0.6956521739130435	0.7213114754098361	0.6666666666666666	0.6944613511868534	0.7096774193548387	0.6792452830188679	0.6941721753666135	11.900387287139893	6.0	0.6347826086956522	0.7	0.5846153846153846	0.6407486305538649	0.5645161290322581	0.7169811320754716	0.6345338983050848	15.706283330917358
60	7.0	0.7844827586206896	0.7377049180327869	0.8363636363636363	0.7876344086021505	0.8333333333333334	0.7419354838709677	0.7844667409884801	1.7650103569030762	7.0	0.8103448275862069	0.7758620689655172	0.8448275862068966	0.8118279569892473	0.8333333333333334	0.7903225806451613	0.8101190476190476	6.960175037384033	7.0	0.7672413793103449	0.6956521739130435	0.8723404255319149	0.7750896057347669	0.8888888888888888	0.6612903225806451	0.7663906914298502	10.282063484191895	7.0	0.8017241379310345	0.803921568627451	0.8	0.798984468339307	0.7592592592592593	0.8387096774193549	0.7999250093738284	12.739656925201416	7.0	0.7327586206896551	0.6949152542372882	0.7719298245614035	0.734468339307049	0.7592592592592593	0.7096774193548387	0.7325797575667434	15.681289434432983
61	7.0	0.7652173913043478	0.7272727272727273	0.8	0.7655677655677655	0.7692307692307693	0.7619047619047619	0.7640756781399589	1.6709520816802979	7.0	0.782608695652174	0.7288135593220338	0.8392857142857143	0.7864774114774115	0.8269230769230769	0.746031746031746	0.7823453705806647	6.672559499740601	7.0	0.7304347826086957	0.647887323943662	0.8636363636363636	0.7438949938949939	0.8846153846153846	0.6031746031746031	0.7291239267532862	10.926535606384277	7.0	0.7478260869565218	0.7090909090909091	0.7833333333333333	0.748015873015873	0.75	0.746031746031746	0.7465998024466227	13.028655290603638	7.0	0.7478260869565218	0.6949152542372882	0.8035714285714286	0.7513736263736264	0.7884615384615384	0.7142857142857143	0.747520629873571	15.37110185623169
62	7.0	0.8434782608695652	0.8444444444444444	0.8428571428571429	0.8347247990105133	0.7755102040816326	0.8939393939393939	0.8380788485607009	1.5929043292999268	7.0	0.7652173913043478	0.6833333333333333	0.8545454545454545	0.7744279529993816	0.8367346938775511	0.7121212121212122	0.7645765410569414	6.691340923309326	7.0	0.8260869565217391	0.7377049180327869	0.9259259259259259	0.8379715522572666	0.9183673469387755	0.7575757575757576	0.8257575757575758	11.93691349029541	7.0	0.8173913043478261	0.8181818181818182	0.8169014084507042	0.8067408781694496	0.7346938775510204	0.8787878787878788	0.8104544384271251	13.007651567459106	7.0	0.7739130434782608	0.7169811320754716	0.8225806451612904	0.7741187384044527	0.7755102040816326	0.7727272727272727	0.7709865196078431	15.557001829147339
63	7.0	0.808695652173913	0.8979591836734694	0.7424242424242424	0.8143594414086217	0.7213114754098361	0.9074074074074074	0.8083333333333333	1.4573657512664795	7.0	0.782608695652174	0.8214285714285714	0.7457627118644068	0.7844565877352763	0.7540983606557377	0.8148148148148148	0.7825429241358446	6.568983554840088	7.0	0.7391304347826086	0.7246376811594203	0.7608695652173914	0.7339101396478446	0.819672131147541	0.6481481481481481	0.7346153846153847	10.309656858444214	7.0	0.7478260869565218	0.7962962962962963	0.7049180327868853	0.7506071645415908	0.7049180327868853	0.7962962962962963	0.7478260869565216	12.718988418579102	7.0	0.7304347826086957	0.7884615384615384	0.6825396825396826	0.73421372191864	0.6721311475409836	0.7962962962962963	0.7303532259284471	14.954505681991577
64	7.0	0.808695652173913	0.8461538461538461	0.7777777777777778	0.809134906231095	0.7586206896551724	0.8596491228070176	0.8083333333333333	1.5503556728363037	7.0	0.7478260869565218	0.7959183673469388	0.7121212121212122	0.7484875983061101	0.6724137931034483	0.8245614035087719	0.7465998024466226	6.404305696487427	7.0	0.6782608695652174	0.7058823529411765	0.65625	0.6787658802177858	0.6206896551724138	0.7368421052631579	0.6773826673743271	10.328725337982178	7.0	0.7478260869565218	0.7843137254901961	0.71875	0.7483363581367211	0.6896551724137931	0.8070175438596491	0.7471377663204186	11.743304014205933	7.0	0.7478260869565218	0.7543859649122807	0.7413793103448276	0.7478826376285541	0.7413793103448276	0.7543859649122807	0.7478260869565219	15.386496782302856
65	7.0	0.782608695652174	0.8	0.7636363636363637	0.7823315118397085	0.7868852459016393	0.7777777777777778	0.7820153157934643	1.4992892742156982	7.0	0.7739130434782608	0.7692307692307693	0.78	0.7709471766848817	0.819672131147541	0.7222222222222222	0.771825396825397	5.956977844238281	7.0	0.7565217391304347	0.7391304347826086	0.782608695652174	0.7513661202185793	0.8360655737704918	0.6666666666666666	0.7523076923076923	10.185505151748657	7.0	0.7565217391304347	0.7894736842105263	0.7241379310344828	0.7577413479052824	0.7377049180327869	0.7777777777777778	0.7563559322033899	11.892733097076416	7.0	0.7217391304347827	0.7301587301587301	0.7115384615384616	0.7196417729204614	0.7540983606557377	0.6851851851851852	0.7200243457090687	14.623106479644775
66	7.0	0.7565217391304347	0.7538461538461538	0.76	0.7534911961141469	0.8032786885245902	0.7037037037037037	0.7542735042735043	1.8836188316345215	7.0	0.8	0.8518518518518519	0.7540983606557377	0.8029751062537948	0.7540983606557377	0.8518518518518519	0.7999999999999999	5.924565076828003	7.0	0.6869565217391305	0.6984126984126984	0.6730769230769231	0.6847298117789922	0.7213114754098361	0.6481481481481481	0.6850273889227024	10.114897012710571	7.0	0.782608695652174	0.78125	0.7843137254901961	0.7802064359441409	0.819672131147541	0.7407407407407407	0.7809523809523808	12.49162769317627	7.0	0.8173913043478261	0.8125	0.8235294117647058	0.8151183970856102	0.8524590163934426	0.7777777777777778	0.8159999999999998	15.578730821609497
67	7.0	0.7652173913043478	0.75	0.7777777777777778	0.7630858186244673	0.7358490566037735	0.7903225806451613	0.7634285714285713	1.6521341800689697	7.0	0.7217391304347827	0.6779661016949152	0.7678571428571429	0.7241326841144249	0.7547169811320755	0.6935483870967742	0.7215496368038741	5.549060821533203	7.0	0.7217391304347827	0.647887323943662	0.8409090909090909	0.732349360925137	0.8679245283018868	0.5967741935483871	0.7200243457090687	10.689778566360474	7.0	0.7217391304347827	0.6779661016949152	0.7678571428571429	0.7241326841144249	0.7547169811320755	0.6935483870967742	0.7215496368038741	12.197955846786499	7.0	0.7391304347826086	0.6949152542372882	0.7857142857142857	0.7416311625076081	0.7735849056603774	0.7096774193548387	0.7389527845036321	15.29498839378357
68	7.0	0.7391304347826086	0.7636363636363637	0.7166666666666667	0.739860774818402	0.711864406779661	0.7678571428571429	0.7391107078039928	1.536302089691162	7.0	0.7652173913043478	0.7857142857142857	0.7457627118644068	0.7657384987893463	0.7457627118644068	0.7857142857142857	0.7652173913043477	5.801424980163574	7.0	0.8	0.75	0.8837209302325582	0.7969128329297821	0.9152542372881356	0.6785714285714286	0.796052124296399	10.775589942932129	7.0	0.7043478260869566	0.711864406779661	0.6964285714285714	0.7041464891041163	0.711864406779661	0.6964285714285714	0.7041464891041163	11.988573551177979	7.0	0.7043478260869566	0.6923076923076923	0.72	0.7027845036319613	0.7627118644067796	0.6428571428571429	0.7025258673158856	15.270008325576782
69	7.0	0.782608695652174	0.8490566037735849	0.7258064516129032	0.7874315276932441	0.7258064516129032	0.8490566037735849	0.782608695652174	1.6519198417663574	7.0	0.7565217391304347	0.7833333333333333	0.7272727272727273	0.7563907486305539	0.7580645161290323	0.7547169811320755	0.7556162720097146	5.517048120498657	7.0	0.7739130434782608	0.7647058823529411	0.7872340425531915	0.7684114424832623	0.8387096774193549	0.6981132075471698	0.77	10.96366262435913	7.0	0.7043478260869566	0.7258064516129032	0.6792452830188679	0.7025258673158856	0.7258064516129032	0.6792452830188679	0.7025258673158856	10.480987310409546	7.0	0.6869565217391305	0.7241379310344828	0.6491228070175439	0.6877662811929397	0.6774193548387096	0.6981132075471698	0.6863636363636364	15.621474027633667
70	8.0	0.7586206896551724	0.7407407407407407	0.7741935483870968	0.7574671445639187	0.7407407407407407	0.7741935483870968	0.7574671445639187	1.6814403533935547	8.0	0.8017241379310345	0.7818181818181819	0.819672131147541	0.801373954599761	0.7962962962962963	0.8064516129032258	0.8009994778846872	7.070164203643799	8.0	0.7241379310344828	0.6527777777777778	0.8409090909090909	0.7335722819593787	0.8703703703703703	0.5967741935483871	0.722072476789458	10.288323163986206	8.0	0.8103448275862069	0.8333333333333334	0.7941176470588235	0.8058542413381122	0.7407407407407407	0.8709677419354839	0.8075414781297134	11.504573822021484	8.0	0.7586206896551724	0.7166666666666667	0.8035714285714286	0.7610513739545998	0.7962962962962963	0.7258064516129032	0.7585489146595301	15.997517585754395
71	8.0	0.7478260869565218	0.7090909090909091	0.7833333333333333	0.748015873015873	0.75	0.746031746031746	0.7465998024466227	1.646059513092041	8.0	0.8	0.7457627118644068	0.8571428571428571	0.8040293040293041	0.8461538461538461	0.7619047619047619	0.7997577409342116	6.405296087265015	8.0	0.7217391304347827	0.6428571428571429	0.8444444444444444	0.7342796092796093	0.8653846153846154	0.6031746031746031	0.7207043108682454	10.571165800094604	8.0	0.7652173913043478	0.7358490566037735	0.7903225806451613	0.7638888888888888	0.75	0.7777777777777778	0.7634285714285713	12.332431554794312	8.0	0.7217391304347827	0.7	0.7384615384615385	0.7174908424908425	0.6730769230769231	0.7619047619047619	0.7181372549019608	16.631239652633667
72	8.0	0.7739130434782608	0.7169811320754716	0.8225806451612904	0.7741187384044527	0.7755102040816326	0.7727272727272727	0.7709865196078431	1.6066575050354004	8.0	0.782608695652174	0.7068965517241379	0.8596491228070176	0.7895794681508967	0.8367346938775511	0.7424242424242424	0.7815515538332953	5.746421575546265	8.0	0.808695652173913	0.7076923076923077	0.94	0.8254483611626469	0.9387755102040817	0.7121212121212122	0.8086811857229281	11.161426782608032	8.0	0.7913043478260869	0.7777777777777778	0.8	0.7813852813852814	0.7142857142857143	0.8484848484848485	0.7841051314142679	13.107794523239136	8.0	0.8260869565217391	0.7843137254901961	0.859375	0.8248299319727892	0.8163265306122449	0.8333333333333334	0.823076923076923	15.712796688079834
73	8.0	0.8521739130434782	0.8928571428571429	0.8135593220338984	0.8542805100182149	0.819672131147541	0.8888888888888888	0.8521291884123743	1.4717535972595215	8.0	0.782608695652174	0.8461538461538461	0.7301587301587301	0.786581663630844	0.7213114754098361	0.8518518518518519	0.7825429241358445	5.4393744468688965	8.0	0.7217391304347827	0.7301587301587301	0.7115384615384616	0.7196417729204614	0.7540983606557377	0.6851851851851852	0.7200243457090687	9.997965574264526	8.0	0.6956521739130435	0.7708333333333334	0.6417910447761194	0.7014268366727383	0.6065573770491803	0.7962962962962963	0.6948214421108498	12.48835802078247	8.0	0.6956521739130435	0.7407407407407407	0.6557377049180327	0.6982392228293868	0.6557377049180327	0.7407407407407407	0.6956521739130433	14.978527784347534
74	8.0	0.808695652173913	0.8333333333333334	0.7868852459016393	0.808983666061706	0.7758620689655172	0.8421052631578947	0.8085653753026634	1.5469725131988525	8.0	0.7565217391304347	0.8	0.7230769230769231	0.7571082879612825	0.6896551724137931	0.8245614035087719	0.7556162720097146	5.392036437988281	8.0	0.7304347826086957	0.7368421052631579	0.7241379310344828	0.7304900181488203	0.7241379310344828	0.7368421052631579	0.7304347826086957	10.65201997756958	8.0	0.7304347826086957	0.7647058823529411	0.703125	0.7309437386569873	0.6724137931034483	0.7894736842105263	0.7296989915838956	11.961694717407227	8.0	0.7304347826086957	0.7288135593220338	0.7321428571428571	0.7303387779794314	0.7413793103448276	0.7192982456140351	0.7303532259284471	15.206660747528076
75	8.0	0.7652173913043478	0.7833333333333333	0.7454545454545455	0.7648755312689739	0.7704918032786885	0.7592592592592593	0.7645765410569414	1.5172851085662842	8.0	0.7913043478260869	0.8032786885245902	0.7777777777777778	0.790528233151184	0.8032786885245902	0.7777777777777778	0.790528233151184	5.293050527572632	8.0	0.7565217391304347	0.7323943661971831	0.7954545454545454	0.7503035822707953	0.8524590163934426	0.6481481481481481	0.7510822510822511	10.47706651687622	8.0	0.7913043478260869	0.8363636363636363	0.75	0.7937158469945356	0.7540983606557377	0.8333333333333334	0.7912885662431941	11.244905233383179	8.0	0.7391304347826086	0.7627118644067796	0.7142857142857143	0.7392228293867638	0.7377049180327869	0.7407407407407407	0.7386363636363638	15.081453561782837
76	8.0	0.7478260869565218	0.75	0.7450980392156863	0.7452944748026715	0.7868852459016393	0.7037037037037037	0.745904761904762	1.9118566513061523	8.0	0.7913043478260869	0.8363636363636363	0.75	0.7937158469945356	0.7540983606557377	0.8333333333333334	0.7912885662431941	5.897693157196045	8.0	0.6695652173913044	0.6825396825396826	0.6538461538461539	0.6672738312082575	0.7049180327868853	0.6296296296296297	0.6675289105295192	10.153501987457275	8.0	0.7739130434782608	0.7777777777777778	0.7692307692307693	0.7720097146326654	0.8032786885245902	0.7407407407407407	0.7725197808886184	12.508301258087158	8.0	0.782608695652174	0.7903225806451613	0.7735849056603774	0.7812689738919247	0.8032786885245902	0.7592592592592593	0.7815515538332953	15.84344220161438
77	8.0	0.7565217391304347	0.7272727272727273	0.7833333333333333	0.7563907486305539	0.7547169811320755	0.7580645161290323	0.7556162720097146	1.6481962203979492	8.0	0.7304347826086957	0.6896551724137931	0.7719298245614035	0.7321972002434571	0.7547169811320755	0.7096774193548387	0.7301082595200242	5.710128307342529	8.0	0.7478260869565218	0.6666666666666666	0.8837209302325582	0.7592818015824712	0.9056603773584906	0.6129032258064516	0.7459047619047618	10.590590476989746	8.0	0.7391304347826086	0.7169811320754716	0.7580645161290323	0.737522824102252	0.7169811320754716	0.7580645161290323	0.737522824102252	12.788974046707153	8.0	0.7565217391304347	0.7272727272727273	0.7833333333333333	0.7563907486305539	0.7547169811320755	0.7580645161290323	0.7556162720097146	15.371638298034668
78	8.0	0.7130434782608696	0.703125	0.7254901960784313	0.7117130750605327	0.7627118644067796	0.6607142857142857	0.7116480510599499	1.4995362758636475	8.0	0.7565217391304347	0.7719298245614035	0.7413793103448276	0.7568099273607749	0.7457627118644068	0.7678571428571429	0.7565033272837265	5.6165337562561035	8.0	0.7739130434782608	0.726027397260274	0.8571428571428571	0.7705811138014529	0.8983050847457628	0.6428571428571429	0.7688620902906618	10.899299144744873	8.0	0.7217391304347827	0.7368421052631579	0.7068965517241379	0.722003631961259	0.711864406779661	0.7321428571428571	0.7217180883242589	11.829897403717041	8.0	0.7304347826086957	0.7121212121212122	0.7551020408163265	0.7286622276029056	0.7966101694915254	0.6607142857142857	0.7283809523809524	15.934101581573486
79	8.0	0.7565217391304347	0.8541666666666666	0.6865671641791045	0.764607425441266	0.6612903225806451	0.8679245283018868	0.7560606060606061	1.528393268585205	8.0	0.7565217391304347	0.8035714285714286	0.711864406779661	0.7591296409007913	0.7258064516129032	0.7924528301886793	0.7563559322033899	5.680266857147217	8.0	0.808695652173913	0.8125	0.803921568627451	0.8061472915398662	0.8387096774193549	0.7735849056603774	0.806929181929182	10.31227993965149	8.0	0.7043478260869566	0.7333333333333333	0.6727272727272727	0.7038953134510042	0.7096774193548387	0.6981132075471698	0.7032483302975107	11.700752019882202	8.0	0.6869565217391305	0.7321428571428571	0.6440677966101694	0.6891357273280584	0.6612903225806451	0.7169811320754716	0.6867433414043582	16.41688632965088
80	9.0	0.7327586206896551	0.6949152542372882	0.7719298245614035	0.734468339307049	0.7592592592592593	0.7096774193548387	0.7325797575667434	1.6929991245269775	9.0	0.7586206896551724	0.7166666666666667	0.8035714285714286	0.7610513739545998	0.7962962962962963	0.7258064516129032	0.7585489146595301	6.4779157638549805	9.0	0.7672413793103449	0.7076923076923077	0.8431372549019608	0.772700119474313	0.8518518518518519	0.6935483870967742	0.767085595300067	10.833414316177368	9.0	0.8103448275862069	0.82	0.803030303030303	0.8070489844683393	0.7592592592592593	0.8548387096774194	0.8082932692307692	13.117454528808594	9.0	0.7413793103448276	0.6935483870967742	0.7962962962962963	0.7449223416965353	0.7962962962962963	0.6935483870967742	0.7413793103448276	16.449191331863403
81	9.0	0.782608695652174	0.7454545454545455	0.8166666666666667	0.7831196581196581	0.7884615384615384	0.7777777777777778	0.7815515538332953	1.6609501838684082	9.0	0.7739130434782608	0.7166666666666667	0.8363636363636363	0.7785409035409034	0.8269230769230769	0.7301587301587301	0.7737590799031477	6.096238374710083	9.0	0.7739130434782608	0.6911764705882353	0.8936170212765957	0.7852564102564102	0.9038461538461539	0.6666666666666666	0.7734848484848484	9.764829158782959	9.0	0.7565217391304347	0.7142857142857143	0.7966101694915254	0.7576312576312576	0.7692307692307693	0.746031746031746	0.7556162720097146	11.955200672149658	9.0	0.7217391304347827	0.6785714285714286	0.7627118644067796	0.7225274725274725	0.7307692307692307	0.7142857142857143	0.7207043108682454	16.588392972946167
82	9.0	0.8260869565217391	0.8085106382978723	0.8382352941176471	0.8195732838589982	0.7755102040816326	0.8636363636363636	0.8212064676616915	1.6756319999694824	9.0	0.782608695652174	0.7068965517241379	0.8596491228070176	0.7895794681508967	0.8367346938775511	0.7424242424242424	0.7815515538332953	5.803510665893555	9.0	0.808695652173913	0.7076923076923077	0.94	0.8254483611626469	0.9387755102040817	0.7121212121212122	0.8086811857229281	10.44605040550232	9.0	0.7739130434782608	0.7555555555555555	0.7857142857142857	0.7636054421768708	0.6938775510204082	0.8333333333333334	0.7661138923654569	11.651828289031982	9.0	0.808695652173913	0.7547169811320755	0.8548387096774194	0.809678416821274	0.8163265306122449	0.803030303030303	0.8062193627450981	15.89052677154541
83	9.0	0.808695652173913	0.8421052631578947	0.7758620689655172	0.8101092896174864	0.7868852459016393	0.8333333333333334	0.8085653753026634	1.475919246673584	9.0	0.8173913043478261	0.8571428571428571	0.7796610169491526	0.8193685488767456	0.7868852459016393	0.8518518518518519	0.8173360562741094	5.45796012878418	9.0	0.7391304347826086	0.7384615384615385	0.74	0.7360352155434122	0.7868852459016393	0.6851851851851852	0.7367216117216117	10.24677586555481	9.0	0.7565217391304347	0.8	0.7166666666666667	0.7588038858530661	0.7213114754098361	0.7962962962962963	0.7565033272837265	12.126550674438477	9.0	0.7130434782608696	0.7916666666666666	0.6567164179104478	0.7188828172434729	0.6229508196721312	0.8148148148148148	0.7122602168473728	15.69759464263916
84	9.0	0.782608695652174	0.8235294117647058	0.75	0.7831215970961887	0.7241379310344828	0.8421052631578947	0.7820153157934642	1.5773262977600098	9.0	0.7652173913043478	0.803921568627451	0.734375	0.7657289776164549	0.7068965517241379	0.8245614035087719	0.7645765410569414	6.231033802032471	9.0	0.7304347826086957	0.7288135593220338	0.7321428571428571	0.7303387779794314	0.7413793103448276	0.7192982456140351	0.7303532259284471	10.345092296600342	9.0	0.7391304347826086	0.7692307692307693	0.7142857142857143	0.7395644283121597	0.6896551724137931	0.7894736842105263	0.7386363636363638	11.809504270553589	9.0	0.7130434782608696	0.711864406779661	0.7142857142857143	0.7129461584996974	0.7241379310344828	0.7017543859649122	0.7129566598593147	15.667498588562012
85	9.0	0.7913043478260869	0.8032786885245902	0.7777777777777778	0.790528233151184	0.8032786885245902	0.7777777777777778	0.790528233151184	1.5292048454284668	9.0	0.808695652173913	0.819672131147541	0.7962962962962963	0.8079842137219186	0.819672131147541	0.7962962962962963	0.8079842137219186	6.461816310882568	9.0	0.7478260869565218	0.7424242424242424	0.7551020408163265	0.7442319368548878	0.8032786885245902	0.6851851851851852	0.7450500726244171	10.509554147720337	9.0	0.8	0.8166666666666667	0.7818181818181819	0.7997874924104432	0.8032786885245902	0.7962962962962963	0.7994540905299872	11.818432331085205	9.0	0.7565217391304347	0.7894736842105263	0.7241379310344828	0.7577413479052824	0.7377049180327869	0.7777777777777778	0.7563559322033899	15.322353839874268
86	9.0	0.782608695652174	0.7903225806451613	0.7735849056603774	0.7812689738919247	0.8032786885245902	0.7592592592592593	0.7815515538332953	1.879720687866211	9.0	0.7565217391304347	0.7894736842105263	0.7241379310344828	0.7577413479052824	0.7377049180327869	0.7777777777777778	0.7563559322033899	6.877241373062134	9.0	0.7130434782608696	0.7258064516129032	0.6981132075471698	0.7114450516089861	0.7377049180327869	0.6851851851851852	0.7116480510599499	10.247774600982666	9.0	0.7739130434782608	0.7966101694915254	0.75	0.7741347905282332	0.7704918032786885	0.7777777777777778	0.7734848484848486	12.662410259246826	9.0	0.7652173913043478	0.7575757575757576	0.7755102040816326	0.7616879174256224	0.819672131147541	0.7037037037037037	0.7626328262365263	16.401044607162476
87	9.0	0.7304347826086957	0.7115384615384616	0.746031746031746	0.728088861838101	0.6981132075471698	0.7580645161290323	0.7283809523809524	1.655472993850708	9.0	0.7217391304347827	0.6842105263157895	0.7586206896551724	0.7227632379793061	0.7358490566037735	0.7096774193548387	0.7212121212121212	7.06775426864624	9.0	0.7304347826086957	0.6617647058823529	0.8297872340425532	0.7390444309190505	0.8490566037735849	0.6290322580645161	0.7296989915838956	10.62392807006836	9.0	0.7304347826086957	0.6964285714285714	0.7627118644067796	0.7308277541083383	0.7358490566037735	0.7258064516129032	0.7296989915838956	13.589820623397827	9.0	0.7217391304347827	0.6779661016949152	0.7678571428571429	0.7241326841144249	0.7547169811320755	0.6935483870967742	0.7215496368038741	15.944977283477783
88	9.0	0.7217391304347827	0.7288135593220338	0.7142857142857143	0.7215496368038741	0.7288135593220338	0.7142857142857143	0.7215496368038741	1.5565025806427002	9.0	0.7304347826086957	0.7413793103448276	0.7192982456140351	0.7304782082324455	0.7288135593220338	0.7321428571428571	0.7303532259284471	6.4413511753082275	9.0	0.7652173913043478	0.7222222222222222	0.8372093023255814	0.7621065375302664	0.8813559322033898	0.6428571428571429	0.7605829285218598	12.01004934310913	9.0	0.7217391304347827	0.7368421052631579	0.7068965517241379	0.722003631961259	0.711864406779661	0.7321428571428571	0.7217180883242589	10.734184980392456	9.0	0.7217391304347827	0.7014925373134329	0.75	0.7197336561743342	0.7966101694915254	0.6428571428571429	0.7191697191697193	16.184799194335938
89	9.0	0.7478260869565218	0.8235294117647058	0.6875	0.7538040170419964	0.6774193548387096	0.8301886792452831	0.7477497919975795	1.5568437576293945	9.0	0.782608695652174	0.8363636363636363	0.7333333333333333	0.7860620815581254	0.7419354838709677	0.8301886792452831	0.7825429241358445	6.436378479003906	9.0	0.7913043478260869	0.7794117647058824	0.8085106382978723	0.7859099208764455	0.8548387096774194	0.7169811320754716	0.7876923076923077	10.133403778076172	9.0	0.6695652173913044	0.7142857142857143	0.6271186440677966	0.6716372489348752	0.6451612903225806	0.6981132075471698	0.6693401937046004	11.475521802902222	9.0	0.7130434782608696	0.7377049180327869	0.6851851851851852	0.7119598295800365	0.7258064516129032	0.6981132075471698	0.7116480510599499	16.679088592529297
90	10.0	0.7672413793103449	0.7288135593220338	0.8070175438596491	0.769115890083632	0.7962962962962963	0.7419354838709677	0.7670855953000669	1.6555564403533936	10.0	0.7586206896551724	0.7241379310344828	0.7931034482758621	0.7598566308243728	0.7777777777777778	0.7419354838709677	0.7583333333333333	6.937038421630859	10.0	0.75	0.6811594202898551	0.851063829787234	0.7577658303464755	0.8703703703703703	0.6451612903225806	0.7490862982024316	10.994080781936646	10.0	0.7844827586206896	0.7959183673469388	0.7761194029850746	0.7804659498207885	0.7222222222222222	0.8387096774193549	0.7817415518928275	13.371376037597656	10.0	0.7672413793103449	0.7213114754098361	0.8181818181818182	0.770310633213859	0.8148148148148148	0.7258064516129032	0.7672240802675585	16.85438299179077
91	10.0	0.7391304347826086	0.6896551724137931	0.7894736842105263	0.7417582417582418	0.7692307692307693	0.7142857142857143	0.7386363636363638	1.6381690502166748	10.0	0.8173913043478261	0.7719298245614035	0.8620689655172413	0.8199023199023199	0.8461538461538461	0.7936507936507936	0.81689286526651	6.80419659614563	10.0	0.7391304347826086	0.6571428571428571	0.8666666666666667	0.7518315018315018	0.8846153846153846	0.6190476190476191	0.73816029143898	10.892911672592163	10.0	0.782608695652174	0.7647058823529411	0.796875	0.7797619047619048	0.75	0.8095238095238095	0.7802155798486354	12.61696743965149	10.0	0.7652173913043478	0.711864406779661	0.8214285714285714	0.7689255189255189	0.8076923076923077	0.7301587301587301	0.764933000227118	16.660616874694824
92	10.0	0.8434782608695652	0.8297872340425532	0.8529411764705882	0.8373531230674087	0.7959183673469388	0.8787878787878788	0.8390858208955223	1.5838181972503662	10.0	0.7652173913043478	0.6833333333333333	0.8545454545454545	0.7744279529993816	0.8367346938775511	0.7121212121212122	0.7645765410569414	6.752363443374634	10.0	0.808695652173913	0.7142857142857143	0.9230769230769231	0.8228200371057515	0.9183673469387755	0.7272727272727273	0.8085653753026635	11.004276990890503	10.0	0.8	0.7954545454545454	0.8028169014084507	0.788961038961039	0.7142857142857143	0.8636363636363636	0.7924024801820893	12.821275472640991	10.0	0.8	0.7708333333333334	0.8208955223880597	0.7942176870748299	0.7551020408163265	0.8333333333333334	0.7949771335555385	16.083003759384155
93	10.0	0.7913043478260869	0.8936170212765957	0.7205882352941176	0.7979659987856709	0.6885245901639344	0.9074074074074074	0.7905282331511838	1.4645600318908691	10.0	0.808695652173913	0.8421052631578947	0.7758620689655172	0.8101092896174864	0.7868852459016393	0.8333333333333334	0.8085653753026634	7.258062362670898	10.0	0.7565217391304347	0.7704918032786885	0.7407407407407407	0.7556162720097146	0.7704918032786885	0.7407407407407407	0.7556162720097146	9.811272621154785	10.0	0.7565217391304347	0.8113207547169812	0.7096774193548387	0.75986642380085	0.7049180327868853	0.8148148148148148	0.7565033272837265	12.222278833389282	10.0	0.7478260869565218	0.82	0.6923076923076923	0.7527322404371585	0.6721311475409836	0.8333333333333334	0.747520629873571	15.671232223510742
94	10.0	0.782608695652174	0.8113207547169812	0.7580645161290323	0.7829703569267998	0.7413793103448276	0.8245614035087719	0.7823453705806647	1.6175620555877686	10.0	0.782608695652174	0.8113207547169812	0.7580645161290323	0.7829703569267998	0.7413793103448276	0.8245614035087719	0.7823453705806647	7.169952392578125	10.0	0.7217391304347827	0.7407407407407407	0.7049180327868853	0.722020568663037	0.6896551724137931	0.7543859649122807	0.7215496368038741	9.920722723007202	10.0	0.7739130434782608	0.8333333333333334	0.7313432835820896	0.7746521476104054	0.6896551724137931	0.8596491228070176	0.7725197808886184	11.725695610046387	10.0	0.7565217391304347	0.7419354838709677	0.7735849056603774	0.7562008469449486	0.7931034482758621	0.7192982456140351	0.7560606060606061	15.247076272964478
95	10.0	0.7304347826086957	0.7419354838709677	0.7169811320754716	0.7289010321797207	0.7540983606557377	0.7037037037037037	0.7291239267532863	1.5327835083007812	10.0	0.7913043478260869	0.7936507936507936	0.7884615384615384	0.7894656952034002	0.819672131147541	0.7592592592592593	0.7900182592818016	6.711553573608398	10.0	0.7304347826086957	0.7272727272727273	0.7346938775510204	0.7267759562841529	0.7868852459016393	0.6666666666666666	0.727467319012308	10.523685693740845	10.0	0.8173913043478261	0.8571428571428571	0.7796610169491526	0.8193685488767456	0.7868852459016393	0.8518518518518519	0.8173360562741094	11.2839195728302	10.0	0.7913043478260869	0.8363636363636363	0.75	0.7937158469945356	0.7540983606557377	0.8333333333333334	0.7912885662431941	16.22457265853882
96	10.0	0.7652173913043478	0.765625	0.7647058823529411	0.7627504553734061	0.8032786885245902	0.7222222222222222	0.7634285714285713	1.8615434169769287	10.0	0.8347826086956521	0.9038461538461539	0.7777777777777778	0.838949605343048	0.7704918032786885	0.9074074074074074	0.8347326223432419	6.784055233001709	10.0	0.6869565217391305	0.6923076923076923	0.68	0.6836672738312083	0.7377049180327869	0.6296296296296297	0.6840659340659341	10.347697734832764	10.0	0.7391304347826086	0.7540983606557377	0.7222222222222222	0.73816029143898	0.7540983606557377	0.7222222222222222	0.73816029143898	12.165574312210083	10.0	0.782608695652174	0.7903225806451613	0.7735849056603774	0.7812689738919247	0.8032786885245902	0.7592592592592593	0.7815515538332953	16.175225973129272
97	10.0	0.7565217391304347	0.7272727272727273	0.7833333333333333	0.7563907486305539	0.7547169811320755	0.7580645161290323	0.7556162720097146	1.6567699909210205	10.0	0.6956521739130435	0.65	0.7454545454545455	0.6985696895922093	0.7358490566037735	0.6612903225806451	0.6955600937901824	6.816731929779053	10.0	0.7739130434782608	0.6956521739130435	0.8913043478260869	0.7834753499695679	0.9056603773584906	0.6612903225806451	0.7730722525804493	10.620563745498657	10.0	0.7391304347826086	0.7090909090909091	0.7666666666666667	0.7388922702373706	0.7358490566037735	0.7419354838709677	0.7381602914389799	12.67344331741333	10.0	0.7304347826086957	0.6833333333333333	0.7818181818181819	0.7335666463785758	0.7735849056603774	0.6935483870967742	0.7303532259284472	16.02119517326355
98	10.0	0.7043478260869566	0.7049180327868853	0.7037037037037037	0.7036924939467313	0.7288135593220338	0.6785714285714286	0.7037878787878787	1.4905660152435303	10.0	0.7652173913043478	0.7758620689655172	0.7543859649122807	0.7652845036319613	0.7627118644067796	0.7678571428571429	0.7651463580667122	6.384762525558472	10.0	0.7739130434782608	0.726027397260274	0.8571428571428571	0.7705811138014529	0.8983050847457628	0.6428571428571429	0.7688620902906618	9.185733318328857	10.0	0.6956521739130435	0.7068965517241379	0.6842105263157895	0.6956719128329298	0.6949152542372882	0.6964285714285714	0.6955600937901822	11.53145432472229	10.0	0.7043478260869566	0.6865671641791045	0.7291666666666666	0.7023305084745763	0.7796610169491526	0.625	0.7016178266178266	16.36529278755188
99	10.0	0.7391304347826086	0.82	0.676923076923077	0.7457395009129641	0.6612903225806451	0.8301886792452831	0.738952784503632	1.5633437633514404	10.0	0.7739130434782608	0.8214285714285714	0.7288135593220338	0.7766281192939745	0.7419354838709677	0.8113207547169812	0.7737590799031477	6.609203577041626	10.0	0.8	0.782608695652174	0.8260869565217391	0.7939744370054778	0.8709677419354839	0.7169811320754716	0.7960521242963992	10.20967149734497	10.0	0.6869565217391305	0.7241379310344828	0.6491228070175439	0.6877662811929397	0.6774193548387096	0.6981132075471698	0.6863636363636364	11.389214038848877	10.0	0.7217391304347827	0.75	0.6909090909090909	0.7213937918441875	0.7258064516129032	0.7169811320754716	0.7207043108682454	16.298920154571533
100	11.0	0.7327586206896551	0.6949152542372882	0.7719298245614035	0.734468339307049	0.7592592592592593	0.7096774193548387	0.7325797575667434	1.673647165298462	11.0	0.7758620689655172	0.7413793103448276	0.8103448275862069	0.7771804062126643	0.7962962962962963	0.7580645161290323	0.7755952380952381	6.361026287078857	11.0	0.7672413793103449	0.7076923076923077	0.8431372549019608	0.772700119474313	0.8518518518518519	0.6935483870967742	0.767085595300067	10.479111671447754	11.0	0.8362068965517241	0.8181818181818182	0.8524590163934426	0.8360215053763441	0.8333333333333334	0.8387096774193549	0.8356082643395242	12.651675939559937	11.0	0.7758620689655172	0.7413793103448276	0.8103448275862069	0.7771804062126643	0.7962962962962963	0.7580645161290323	0.7755952380952381	16.830926418304443
101	11.0	0.7739130434782608	0.7321428571428571	0.8135593220338984	0.7751831501831501	0.7884615384615384	0.7619047619047619	0.7730722525804492	1.6302239894866943	11.0	0.8	0.7543859649122807	0.8448275862068966	0.8023504273504274	0.8269230769230769	0.7777777777777778	0.7994540905299872	6.371316909790039	11.0	0.7391304347826086	0.6571428571428571	0.8666666666666667	0.7518315018315018	0.8846153846153846	0.6190476190476191	0.73816029143898	11.065094470977783	11.0	0.782608695652174	0.7547169811320755	0.8064516129032258	0.7814407814407814	0.7692307692307693	0.7936507936507936	0.7809523809523808	12.738077163696289	11.0	0.7652173913043478	0.711864406779661	0.8214285714285714	0.7689255189255189	0.8076923076923077	0.7301587301587301	0.764933000227118	16.70010209083557
102	11.0	0.7739130434782608	0.7169811320754716	0.8225806451612904	0.7741187384044527	0.7755102040816326	0.7727272727272727	0.7709865196078431	1.588399887084961	11.0	0.7913043478260869	0.7192982456140351	0.8620689655172413	0.7971552257266543	0.8367346938775511	0.7575757575757576	0.7900182592818015	5.677285671234131	11.0	0.808695652173913	0.7142857142857143	0.9230769230769231	0.8228200371057515	0.9183673469387755	0.7272727272727273	0.8085653753026635	11.541348695755005	11.0	0.8	0.8095238095238095	0.7945205479452054	0.7863327149041435	0.6938775510204082	0.8787878787878788	0.7908925606767332	12.760464429855347	11.0	0.7565217391304347	0.7142857142857143	0.7878787878787878	0.751082251082251	0.7142857142857143	0.7878787878787878	0.751082251082251	17.166995763778687
103	11.0	0.808695652173913	0.8823529411764706	0.75	0.8132969034608379	0.7377049180327869	0.8888888888888888	0.8085653753026634	1.458456039428711	11.0	0.7652173913043478	0.8035714285714286	0.7288135593220338	0.7670006071645417	0.7377049180327869	0.7962962962962963	0.7651463580667122	5.863295793533325	11.0	0.7391304347826086	0.7246376811594203	0.7608695652173914	0.7339101396478446	0.819672131147541	0.6481481481481481	0.7346153846153847	10.015327453613281	11.0	0.7391304347826086	0.7719298245614035	0.7068965517241379	0.7402853673345478	0.7213114754098361	0.7592592592592593	0.7389527845036319	12.169960498809814	11.0	0.7739130434782608	0.8301886792452831	0.7258064516129032	0.7773224043715847	0.7213114754098361	0.8333333333333334	0.7738959467634603	16.01560640335083
104	11.0	0.782608695652174	0.8113207547169812	0.7580645161290323	0.7829703569267998	0.7413793103448276	0.8245614035087719	0.7823453705806647	1.5591464042663574	11.0	0.7565217391304347	0.8	0.7230769230769231	0.7571082879612825	0.6896551724137931	0.8245614035087719	0.7556162720097146	5.528289794921875	11.0	0.6956521739130435	0.7017543859649122	0.6896551724137931	0.6957047791893527	0.6896551724137931	0.7017543859649122	0.6956521739130435	9.672643661499023	11.0	0.7304347826086957	0.7755102040816326	0.696969696969697	0.7310949788263763	0.6551724137931034	0.8070175438596491	0.7291239267532862	11.522921323776245	11.0	0.6956521739130435	0.6949152542372882	0.6964285714285714	0.6955535390199636	0.7068965517241379	0.6842105263157895	0.6955600937901822	16.24960494041443
105	11.0	0.7739130434782608	0.8070175438596491	0.7413793103448276	0.775197328476017	0.7540983606557377	0.7962962962962963	0.7737590799031477	1.5234904289245605	11.0	0.7652173913043478	0.7575757575757576	0.7755102040816326	0.7616879174256224	0.819672131147541	0.7037037037037037	0.7626328262365263	5.333019971847534	11.0	0.7478260869565218	0.7352941176470589	0.7659574468085106	0.7431693989071038	0.819672131147541	0.6666666666666666	0.7440325427891625	12.281455993652344	11.0	0.7739130434782608	0.8070175438596491	0.7413793103448276	0.775197328476017	0.7540983606557377	0.7962962962962963	0.7737590799031477	11.281615734100342	11.0	0.7565217391304347	0.7704918032786885	0.7407407407407407	0.7556162720097146	0.7704918032786885	0.7407407407407407	0.7556162720097146	15.78718376159668
106	11.0	0.7652173913043478	0.7575757575757576	0.7755102040816326	0.7616879174256224	0.819672131147541	0.7037037037037037	0.7626328262365263	1.9020094871520996	11.0	0.7913043478260869	0.8490566037735849	0.7419354838709677	0.7947783849423193	0.7377049180327869	0.8518518518518519	0.7912885662431942	5.916484832763672	11.0	0.6956521739130435	0.696969696969697	0.6938775510204082	0.6918639951426837	0.7540983606557377	0.6296296296296297	0.6923018117880896	10.604922533035278	11.0	0.7652173913043478	0.7931034482758621	0.7368421052631579	0.7659380692167577	0.7540983606557377	0.7777777777777778	0.7649330002271177	12.539821147918701	11.0	0.7739130434782608	0.7868852459016393	0.7592592592592593	0.7730722525804493	0.7868852459016393	0.7592592592592593	0.7730722525804492	16.951679944992065
107	11.0	0.7739130434782608	0.7368421052631579	0.8103448275862069	0.7752586731588558	0.7924528301886793	0.7580645161290323	0.7734848484848484	1.6549015045166016	11.0	0.7043478260869566	0.6666666666666666	0.7413793103448276	0.705264759586123	0.7169811320754716	0.6935483870967742	0.7037878787878789	6.127202749252319	11.0	0.7478260869565218	0.6666666666666666	0.8837209302325582	0.7592818015824712	0.9056603773584906	0.6129032258064516	0.7459047619047618	10.467154264450073	11.0	0.7130434782608696	0.6724137931034483	0.7543859649122807	0.7146987218502738	0.7358490566037735	0.6935483870967742	0.7126958891664774	12.510628938674927	11.0	0.7565217391304347	0.711864406779661	0.8035714285714286	0.7591296409007913	0.7924528301886793	0.7258064516129032	0.7563559322033899	16.947434425354004
108	11.0	0.7391304347826086	0.7377049180327869	0.7407407407407407	0.7384987893462469	0.7627118644067796	0.7142857142857143	0.7386363636363638	1.5145220756530762	11.0	0.7652173913043478	0.7758620689655172	0.7543859649122807	0.7652845036319613	0.7627118644067796	0.7678571428571429	0.7651463580667122	6.467613935470581	11.0	0.7739130434782608	0.7323943661971831	0.8409090909090909	0.7710351089588378	0.8813559322033898	0.6607142857142857	0.77	11.033909559249878	11.0	0.7043478260869566	0.7049180327868853	0.7037037037037037	0.7036924939467313	0.7288135593220338	0.6785714285714286	0.7037878787878787	12.068212747573853	11.0	0.7130434782608696	0.696969696969697	0.7346938775510204	0.7112590799031477	0.7796610169491526	0.6428571428571429	0.7108571428571429	17.620131254196167
109	11.0	0.7304347826086957	0.8163265306122449	0.6666666666666666	0.7376749847839319	0.6451612903225806	0.8301886792452831	0.7301082595200242	1.3452167510986328	11.0	0.7739130434782608	0.8333333333333334	0.7213114754098361	0.7779975654290932	0.7258064516129032	0.8301886792452831	0.7738959467634603	6.016305685043335	11.0	0.808695652173913	0.7857142857142857	0.8444444444444444	0.80203895313451	0.8870967741935484	0.7169811320754716	0.8044217687074829	10.61147689819336	11.0	0.6869565217391305	0.7166666666666667	0.6545454545454545	0.6863968350578211	0.6935483870967742	0.6792452830188679	0.6857923497267759	11.780030965805054	11.0	0.7043478260869566	0.7258064516129032	0.6792452830188679	0.7025258673158856	0.7258064516129032	0.6792452830188679	0.7025258673158856	17.108343839645386
110	12.0	0.75	0.711864406779661	0.7894736842105263	0.7517921146953406	0.7777777777777778	0.7258064516129032	0.7498326764334052	1.6763226985931396	12.0	0.7586206896551724	0.7166666666666667	0.8035714285714286	0.7610513739545998	0.7962962962962963	0.7258064516129032	0.7585489146595301	6.366246700286865	12.0	0.7586206896551724	0.6857142857142857	0.8695652173913043	0.7670250896057347	0.8888888888888888	0.6451612903225806	0.7574671445639187	10.883384227752686	12.0	0.7844827586206896	0.8085106382978723	0.7681159420289855	0.7792712066905616	0.7037037037037037	0.8548387096774194	0.780817776434132	13.321967601776123	12.0	0.7586206896551724	0.7166666666666667	0.8035714285714286	0.7610513739545998	0.7962962962962963	0.7258064516129032	0.7585489146595301	16.622738122940063
111	12.0	0.7913043478260869	0.75	0.8305084745762712	0.7927350427350428	0.8076923076923077	0.7777777777777778	0.790528233151184	1.6185836791992188	12.0	0.808695652173913	0.7419354838709677	0.8867924528301887	0.8153235653235653	0.8846153846153846	0.746031746031746	0.808681185722928	6.895727634429932	12.0	0.7391304347826086	0.6571428571428571	0.8666666666666667	0.7518315018315018	0.8846153846153846	0.6190476190476191	0.73816029143898	11.098603248596191	12.0	0.808695652173913	0.7884615384615384	0.8253968253968254	0.806929181929182	0.7884615384615384	0.8253968253968254	0.806929181929182	12.232226133346558	12.0	0.7652173913043478	0.7272727272727273	0.8	0.7655677655677655	0.7692307692307693	0.7619047619047619	0.7640756781399589	17.51383328437805
112	12.0	0.7913043478260869	0.7659574468085106	0.8088235294117647	0.7840136054421769	0.7346938775510204	0.8333333333333334	0.7854477611940298	1.6383295059204102	12.0	0.8	0.7321428571428571	0.864406779661017	0.8047309833024119	0.8367346938775511	0.7727272727272727	0.7984761904761905	6.554210424423218	12.0	0.8173913043478261	0.71875	0.9411764705882353	0.8330241187384044	0.9387755102040817	0.7272727272727273	0.8173360562741093	11.35042428970337	12.0	0.8	0.8095238095238095	0.7945205479452054	0.7863327149041435	0.6938775510204082	0.8787878787878788	0.7908925606767332	12.87656855583191	12.0	0.8	0.7708333333333334	0.8208955223880597	0.7942176870748299	0.7551020408163265	0.8333333333333334	0.7949771335555385	16.747246503829956
113	12.0	0.808695652173913	0.8679245283018868	0.7580645161290323	0.812234365513054	0.7540983606557377	0.8703703703703703	0.8086811857229279	1.497666358947754	12.0	0.7739130434782608	0.8181818181818182	0.7333333333333333	0.7762598664238008	0.7377049180327869	0.8148148148148148	0.7738959467634603	6.5030882358551025	12.0	0.7304347826086957	0.7272727272727273	0.7346938775510204	0.7267759562841529	0.7868852459016393	0.6666666666666666	0.727467319012308	9.906882524490356	12.0	0.7478260869565218	0.7758620689655172	0.7192982456140351	0.7484820886460231	0.7377049180327869	0.7592592592592593	0.747520629873571	11.928253650665283	12.0	0.7913043478260869	0.8363636363636363	0.75	0.7937158469945356	0.7540983606557377	0.8333333333333334	0.7912885662431941	16.802603483200073
114	12.0	0.7913043478260869	0.8148148148148148	0.7704918032786885	0.7915910465819722	0.7586206896551724	0.8245614035087719	0.7911622276029056	1.5804307460784912	12.0	0.7652173913043478	0.8163265306122449	0.7272727272727273	0.7658802177858439	0.6896551724137931	0.8421052631578947	0.764075678139959	5.754822015762329	12.0	0.7130434782608696	0.7049180327868853	0.7222222222222222	0.7127949183303086	0.7413793103448276	0.6842105263157895	0.7126958891664774	10.28291368484497	12.0	0.7043478260869566	0.75	0.6716417910447762	0.7050816696914701	0.6206896551724138	0.7894736842105263	0.7025258673158856	11.883710384368896	12.0	0.7565217391304347	0.7586206896551724	0.7543859649122807	0.7565033272837265	0.7586206896551724	0.7543859649122807	0.7565033272837265	16.92597532272339
115	12.0	0.8	0.796875	0.803921568627451	0.7976624165148756	0.8360655737704918	0.7592592592592593	0.7984761904761905	1.5195086002349854	12.0	0.7478260869565218	0.7580645161290323	0.7358490566037735	0.7463570127504553	0.7704918032786885	0.7222222222222222	0.7465998024466226	6.268591642379761	12.0	0.7565217391304347	0.746268656716418	0.7708333333333334	0.7524286581663631	0.819672131147541	0.6851851851851852	0.7533700980392157	10.28665280342102	12.0	0.7478260869565218	0.7758620689655172	0.7192982456140351	0.7484820886460231	0.7377049180327869	0.7592592592592593	0.747520629873571	11.894758939743042	12.0	0.7565217391304347	0.7704918032786885	0.7407407407407407	0.7556162720097146	0.7704918032786885	0.7407407407407407	0.7556162720097146	17.200925827026367
116	12.0	0.7652173913043478	0.7741935483870968	0.7547169811320755	0.76381299332119	0.7868852459016393	0.7407407407407407	0.764075678139959	1.873082160949707	12.0	0.8	0.8518518518518519	0.7540983606557377	0.8029751062537948	0.7540983606557377	0.8518518518518519	0.7999999999999999	6.848052978515625	12.0	0.6956521739130435	0.703125	0.6862745098039216	0.6929265330904675	0.7377049180327869	0.6481481481481481	0.6933333333333334	9.925044536590576	12.0	0.7739130434782608	0.7868852459016393	0.7592592592592593	0.7730722525804493	0.7868852459016393	0.7592592592592593	0.7730722525804492	13.123019695281982	12.0	0.782608695652174	0.8	0.7636363636363637	0.7823315118397085	0.7868852459016393	0.7777777777777778	0.7820153157934643	17.891766786575317
117	12.0	0.7391304347826086	0.7169811320754716	0.7580645161290323	0.737522824102252	0.7169811320754716	0.7580645161290323	0.737522824102252	1.6477031707763672	12.0	0.6869565217391305	0.6440677966101694	0.7321428571428571	0.6891357273280584	0.7169811320754716	0.6612903225806451	0.6867433414043582	6.593710899353027	12.0	0.7565217391304347	0.6811594202898551	0.8695652173913043	0.7659768715763846	0.8867924528301887	0.6451612903225806	0.7556162720097146	10.675429582595825	12.0	0.6782608695652174	0.6379310344827587	0.7192982456140351	0.6797017650639074	0.6981132075471698	0.6612903225806451	0.6778711484593838	13.053711652755737	12.0	0.7565217391304347	0.7358490566037735	0.7741935483870968	0.7550213024954351	0.7358490566037735	0.7741935483870968	0.7550213024954351	17.852588653564453
118	12.0	0.7565217391304347	0.7719298245614035	0.7413793103448276	0.7568099273607749	0.7457627118644068	0.7678571428571429	0.7565033272837265	1.5101885795593262	12.0	0.7565217391304347	0.7627118644067796	0.75	0.7563559322033898	0.7627118644067796	0.75	0.7563559322033898	6.062047481536865	12.0	0.7739130434782608	0.726027397260274	0.8571428571428571	0.7705811138014529	0.8983050847457628	0.6428571428571429	0.7688620902906618	10.398464679718018	12.0	0.7130434782608696	0.7241379310344828	0.7017543859649122	0.7130750605326877	0.711864406779661	0.7142857142857143	0.7129566598593147	11.332270622253418	12.0	0.7043478260869566	0.6865671641791045	0.7291666666666666	0.7023305084745763	0.7796610169491526	0.625	0.7016178266178266	16.33941888809204
119	12.0	0.7043478260869566	0.7916666666666666	0.6417910447761194	0.7121119902617163	0.6129032258064516	0.8113207547169812	0.7037878787878789	1.647346019744873	12.0	0.7913043478260869	0.8392857142857143	0.7457627118644068	0.7941265976871577	0.7580645161290323	0.8301886792452831	0.7911622276029057	6.613041877746582	12.0	0.7913043478260869	0.7794117647058824	0.8085106382978723	0.7859099208764455	0.8548387096774194	0.7169811320754716	0.7876923076923077	10.167291164398193	12.0	0.6434782608695652	0.6721311475409836	0.6111111111111112	0.6419659160073037	0.6612903225806451	0.6226415094339622	0.6417445482866043	11.550333499908447	12.0	0.7043478260869566	0.71875	0.6862745098039216	0.7011564211807668	0.7419354838709677	0.660377358490566	0.7016178266178267	15.836146354675293
120	13.0	0.7586206896551724	0.7166666666666667	0.8035714285714286	0.7610513739545998	0.7962962962962963	0.7258064516129032	0.7585489146595301	1.6612541675567627	13.0	0.8017241379310345	0.7719298245614035	0.8305084745762712	0.802568697729988	0.8148148148148148	0.7903225806451613	0.8013550740823467	7.283198356628418	13.0	0.7413793103448276	0.6818181818181818	0.82	0.7473118279569892	0.8333333333333334	0.6612903225806451	0.7410714285714286	10.660554885864258	13.0	0.8103448275862069	0.7962962962962963	0.8225806451612904	0.8094384707287934	0.7962962962962963	0.8225806451612904	0.8094384707287934	12.855196714401245	13.0	0.7672413793103449	0.7213114754098361	0.8181818181818182	0.770310633213859	0.8148148148148148	0.7258064516129032	0.7672240802675585	16.45185160636902
121	13.0	0.7478260869565218	0.7090909090909091	0.7833333333333333	0.748015873015873	0.75	0.746031746031746	0.7465998024466227	1.6484014987945557	13.0	0.8	0.7377049180327869	0.8703703703703703	0.8057081807081807	0.8653846153846154	0.746031746031746	0.799939490204977	7.297146558761597	13.0	0.7565217391304347	0.6714285714285714	0.8888888888888888	0.7693833943833943	0.9038461538461539	0.6349206349206349	0.7556162720097146	10.371240854263306	13.0	0.7478260869565218	0.7017543859649122	0.7931034482758621	0.7496947496947497	0.7692307692307693	0.7301587301587301	0.7471377663204186	12.161145687103271	13.0	0.7391304347826086	0.6774193548387096	0.8113207547169812	0.7451159951159951	0.8076923076923077	0.6825396825396826	0.7391107078039927	17.326621532440186
122	13.0	0.8173913043478261	0.78	0.8461538461538461	0.814625850340136	0.7959183673469388	0.8333333333333334	0.8137867221836688	1.5685498714447021	13.0	0.782608695652174	0.7068965517241379	0.8596491228070176	0.7895794681508967	0.8367346938775511	0.7424242424242424	0.7815515538332953	6.721926927566528	13.0	0.7913043478260869	0.6811594202898551	0.9565217391304348	0.8129251700680271	0.9591836734693877	0.6666666666666666	0.7911622276029056	10.786925315856934	13.0	0.8173913043478261	0.85	0.8	0.8014842300556586	0.6938775510204082	0.9090909090909091	0.8075543868037294	13.15347933769226	13.0	0.7739130434782608	0.7346938775510204	0.803030303030303	0.7688620902906618	0.7346938775510204	0.803030303030303	0.7688620902906617	18.024085760116577
123	13.0	0.8	0.88	0.7384615384615385	0.8051001821493624	0.7213114754098361	0.8888888888888888	0.7997577409342116	1.4744830131530762	13.0	0.7739130434782608	0.8070175438596491	0.7413793103448276	0.775197328476017	0.7540983606557377	0.7962962962962963	0.7737590799031477	6.44638466835022	13.0	0.7652173913043478	0.7741935483870968	0.7547169811320755	0.76381299332119	0.7868852459016393	0.7407407407407407	0.764075678139959	9.24460768699646	13.0	0.7478260869565218	0.8076923076923077	0.6984126984126984	0.7516697024893746	0.6885245901639344	0.8148148148148148	0.7477497919975795	12.222844123840332	13.0	0.7913043478260869	0.8363636363636363	0.75	0.7937158469945356	0.7540983606557377	0.8333333333333334	0.7912885662431941	17.106773614883423
124	13.0	0.8347826086956521	0.8679245283018868	0.8064516129032258	0.8351482153660013	0.7931034482758621	0.8771929824561403	0.8345824816413052	1.5816407203674316	13.0	0.7391304347826086	0.8043478260869565	0.6956521739130435	0.7400181488203267	0.6379310344827587	0.8421052631578947	0.7367216117216118	6.708112478256226	13.0	0.7043478260869566	0.75	0.6716417910447762	0.7050816696914701	0.6206896551724138	0.7894736842105263	0.7025258673158856	8.920613050460815	13.0	0.7565217391304347	0.8409090909090909	0.704225352112676	0.7575620084694494	0.6379310344827587	0.8771929824561403	0.7533700980392155	11.463048458099365	13.0	0.7217391304347827	0.7166666666666667	0.7272727272727273	0.7215668481548699	0.7413793103448276	0.7017543859649122	0.7215496368038741	16.71115493774414
125	13.0	0.7565217391304347	0.7894736842105263	0.7241379310344828	0.7577413479052824	0.7377049180327869	0.7777777777777778	0.7563559322033899	1.5200684070587158	13.0	0.7304347826086957	0.7142857142857143	0.7555555555555555	0.7246508803885854	0.819672131147541	0.6296296296296297	0.7251137327473205	6.208933115005493	13.0	0.7391304347826086	0.7384615384615385	0.74	0.7360352155434122	0.7868852459016393	0.6851851851851852	0.7367216117216117	10.367374181747437	13.0	0.8173913043478261	0.8333333333333334	0.8	0.8172434729811779	0.819672131147541	0.8148148148148148	0.8168928652665101	10.426141023635864	13.0	0.7478260869565218	0.7758620689655172	0.7192982456140351	0.7484820886460231	0.7377049180327869	0.7592592592592593	0.747520629873571	16.354798555374146
126	13.0	0.7565217391304347	0.7619047619047619	0.75	0.7545537340619308	0.7868852459016393	0.7222222222222222	0.7550213024954351	1.9124326705932617	13.0	0.808695652173913	0.8545454545454545	0.7666666666666667	0.8111718275652702	0.7704918032786885	0.8518518518518519	0.808681185722928	6.905324935913086	13.0	0.6608695652173913	0.6666666666666666	0.6530612244897959	0.6569520340012143	0.7213114754098361	0.5925925925925926	0.6571363045638713	9.8587646484375	13.0	0.7739130434782608	0.7966101694915254	0.75	0.7741347905282332	0.7704918032786885	0.7777777777777778	0.7734848484848486	11.186280012130737	13.0	0.7652173913043478	0.7833333333333333	0.7454545454545455	0.7648755312689739	0.7704918032786885	0.7592592592592593	0.7645765410569414	17.2126407623291
127	13.0	0.7565217391304347	0.7272727272727273	0.7833333333333333	0.7563907486305539	0.7547169811320755	0.7580645161290323	0.7556162720097146	1.6694221496582031	13.0	0.6782608695652174	0.6333333333333333	0.7272727272727273	0.6810712111990261	0.7169811320754716	0.6451612903225806	0.6781635277210498	6.53082275390625	13.0	0.7478260869565218	0.6714285714285714	0.8666666666666667	0.7579123554473524	0.8867924528301887	0.6290322580645161	0.7465998024466226	11.160207509994507	13.0	0.6956521739130435	0.6607142857142857	0.7288135593220338	0.695830797321972	0.6981132075471698	0.6935483870967742	0.69482144211085	11.477671384811401	13.0	0.7478260869565218	0.7142857142857143	0.7796610169491526	0.7483262325015216	0.7547169811320755	0.7419354838709677	0.7471377663204186	16.40580105781555
128	13.0	0.7565217391304347	0.7627118644067796	0.75	0.7563559322033898	0.7627118644067796	0.75	0.7563559322033898	1.6680912971496582	13.0	0.7478260869565218	0.7678571428571429	0.7288135593220338	0.7483353510895884	0.7288135593220338	0.7678571428571429	0.7478260869565218	6.730930805206299	13.0	0.7913043478260869	0.7464788732394366	0.8636363636363636	0.7884382566585957	0.8983050847457628	0.6785714285714286	0.7876923076923077	10.46349835395813	13.0	0.7217391304347827	0.7368421052631579	0.7068965517241379	0.722003631961259	0.711864406779661	0.7321428571428571	0.7217180883242589	11.61471176147461	13.0	0.7043478260869566	0.7049180327868853	0.7037037037037037	0.7036924939467313	0.7288135593220338	0.6785714285714286	0.7037878787878787	15.170119285583496
129	13.0	0.7391304347826086	0.8076923076923077	0.6825396825396826	0.7443700547778453	0.6774193548387096	0.8113207547169812	0.7391107078039927	1.5532591342926025	13.0	0.782608695652174	0.8363636363636363	0.7333333333333333	0.7860620815581254	0.7419354838709677	0.8301886792452831	0.7825429241358445	6.700883865356445	13.0	0.8173913043478261	0.8059701492537313	0.8333333333333334	0.8128423615337796	0.8709677419354839	0.7547169811320755	0.8146442551231867	10.971297025680542	13.0	0.7304347826086957	0.7719298245614035	0.6896551724137931	0.7321972002434571	0.7096774193548387	0.7547169811320755	0.7301082595200242	10.972586631774902	13.0	0.6869565217391305	0.7096774193548387	0.660377358490566	0.6850273889227023	0.7096774193548387	0.660377358490566	0.6850273889227024	16.710318326950073
130	14.0	0.7672413793103449	0.7288135593220338	0.8070175438596491	0.769115890083632	0.7962962962962963	0.7419354838709677	0.7670855953000669	1.6933703422546387	14.0	0.7758620689655172	0.7413793103448276	0.8103448275862069	0.7771804062126643	0.7962962962962963	0.7580645161290323	0.7755952380952381	6.843897581100464	14.0	0.7844827586206896	0.7164179104477612	0.8775510204081632	0.7912186379928315	0.8888888888888888	0.6935483870967742	0.7840816022634203	10.232595443725586	14.0	0.75	0.7272727272727273	0.7704918032786885	0.7494026284348865	0.7407407407407407	0.7580645161290323	0.7490862982024316	12.540862083435059	14.0	0.7672413793103449	0.7368421052631579	0.7966101694915254	0.7679211469534051	0.7777777777777778	0.7580645161290323	0.766808130444494	16.368732690811157
131	14.0	0.782608695652174	0.7368421052631579	0.8275862068965517	0.7847985347985348	0.8076923076923077	0.7619047619047619	0.7820153157934644	1.6718707084655762	14.0	0.7652173913043478	0.7192982456140351	0.8103448275862069	0.7672466422466422	0.7884615384615384	0.746031746031746	0.7645765410569414	6.905355215072632	14.0	0.7217391304347827	0.6388888888888888	0.8604651162790697	0.735958485958486	0.8846153846153846	0.5873015873015873	0.7200243457090687	10.999146699905396	14.0	0.782608695652174	0.7547169811320755	0.8064516129032258	0.7814407814407814	0.7692307692307693	0.7936507936507936	0.7809523809523808	13.339665651321411	14.0	0.7391304347826086	0.6833333333333333	0.8	0.7434371184371185	0.7884615384615384	0.6984126984126984	0.7389527845036319	16.84386682510376
132	14.0	0.808695652173913	0.7755102040816326	0.8333333333333334	0.804421768707483	0.7755102040816326	0.8333333333333334	0.804421768707483	1.5784785747528076	14.0	0.782608695652174	0.7307692307692307	0.8253968253968254	0.7816944959802102	0.7755102040816326	0.7878787878787878	0.7793383989561746	6.951672554016113	14.0	0.7913043478260869	0.6923076923076923	0.92	0.8076685219542363	0.9183673469387755	0.696969696969697	0.7912885662431941	11.125781059265137	14.0	0.7652173913043478	0.75	0.7746478873239436	0.7534013605442177	0.673469387755102	0.8333333333333334	0.7562985636920179	14.104724884033203	14.0	0.7913043478260869	0.7358490566037735	0.8387096774193549	0.7918985776128633	0.7959183673469388	0.7878787878787878	0.7886029411764706	16.011889696121216
133	14.0	0.7739130434782608	0.8431372549019608	0.71875	0.7783849423193685	0.7049180327868853	0.8518518518518519	0.7737590799031477	1.4845280647277832	14.0	0.7739130434782608	0.8070175438596491	0.7413793103448276	0.775197328476017	0.7540983606557377	0.7962962962962963	0.7737590799031477	6.901402950286865	14.0	0.7304347826086957	0.7205882352941176	0.7446808510638298	0.7257134183363692	0.8032786885245902	0.6481481481481481	0.7263796147056567	10.060055255889893	14.0	0.7217391304347827	0.7543859649122807	0.6896551724137931	0.7228293867638129	0.7049180327868853	0.7407407407407407	0.7215496368038741	11.945367097854614	14.0	0.7652173913043478	0.8035714285714286	0.7288135593220338	0.7670006071645417	0.7377049180327869	0.7962962962962963	0.7651463580667122	14.786608934402466
134	14.0	0.808695652173913	0.8214285714285714	0.7966101694915254	0.808832425892317	0.7931034482758621	0.8245614035087719	0.808681185722928	1.5517644882202148	14.0	0.7565217391304347	0.8260869565217391	0.7101449275362319	0.7574107683000605	0.6551724137931034	0.8596491228070176	0.7542735042735043	6.360522985458374	14.0	0.7043478260869566	0.7	0.7090909090909091	0.7041742286751361	0.7241379310344828	0.6842105263157895	0.7041464891041163	9.816609144210815	14.0	0.7391304347826086	0.7692307692307693	0.7142857142857143	0.7395644283121597	0.6896551724137931	0.7894736842105263	0.7386363636363638	11.476198196411133	14.0	0.7217391304347827	0.7166666666666667	0.7272727272727273	0.7215668481548699	0.7413793103448276	0.7017543859649122	0.7215496368038741	16.86538529396057
135	14.0	0.7913043478260869	0.7846153846153846	0.8	0.7884031572556163	0.8360655737704918	0.7407407407407407	0.7893772893772893	1.5018987655639648	14.0	0.7739130434782608	0.7868852459016393	0.7592592592592593	0.7730722525804493	0.7868852459016393	0.7592592592592593	0.7730722525804492	6.110056638717651	14.0	0.7478260869565218	0.7222222222222222	0.7906976744186046	0.7410443230115361	0.8524590163934426	0.6296296296296297	0.7414929075265484	10.769688129425049	14.0	0.782608695652174	0.8103448275862069	0.7543859649122807	0.7833940497874924	0.7704918032786885	0.7962962962962963	0.7823453705806647	11.358838081359863	14.0	0.7565217391304347	0.7704918032786885	0.7407407407407407	0.7556162720097146	0.7704918032786885	0.7407407407407407	0.7556162720097146	15.048206567764282
136	14.0	0.7478260869565218	0.7666666666666667	0.7272727272727273	0.7474195506982392	0.7540983606557377	0.7407407407407407	0.7471377663204186	1.8489408493041992	14.0	0.782608695652174	0.8333333333333334	0.7377049180327869	0.7855191256830601	0.7377049180327869	0.8333333333333334	0.782608695652174	6.538094758987427	14.0	0.7130434782608696	0.71875	0.7058823529411765	0.7103825136612021	0.7540983606557377	0.6666666666666666	0.7108571428571429	10.370049476623535	14.0	0.7913043478260869	0.8245614035087719	0.7586206896551724	0.7926533090467516	0.7704918032786885	0.8148148148148148	0.7911622276029056	11.948827981948853	14.0	0.7652173913043478	0.7741935483870968	0.7547169811320755	0.76381299332119	0.7868852459016393	0.7407407407407407	0.764075678139959	16.099910259246826
137	14.0	0.782608695652174	0.7592592592592593	0.8032786885245902	0.7819537431527693	0.7735849056603774	0.7903225806451613	0.7815515538332953	1.5512821674346924	14.0	0.7217391304347827	0.6842105263157895	0.7586206896551724	0.7227632379793061	0.7358490566037735	0.7096774193548387	0.7212121212121212	6.773989677429199	14.0	0.7391304347826086	0.6666666666666666	0.8478260869565217	0.7484783931832015	0.8679245283018868	0.6290322580645161	0.7381602914389799	10.391276359558105	14.0	0.7043478260869566	0.6610169491525424	0.75	0.7066342057212416	0.7358490566037735	0.6774193548387096	0.7041464891041163	12.378236770629883	14.0	0.7739130434782608	0.7454545454545455	0.8	0.7738892270237371	0.7735849056603774	0.7741935483870968	0.7730722525804493	15.149044275283813
138	14.0	0.7304347826086957	0.7413793103448276	0.7192982456140351	0.7304782082324455	0.7288135593220338	0.7321428571428571	0.7303532259284471	1.3015153408050537	14.0	0.782608695652174	0.8035714285714286	0.7627118644067796	0.7831416464891041	0.7627118644067796	0.8035714285714286	0.782608695652174	6.8838050365448	14.0	0.7739130434782608	0.7323943661971831	0.8409090909090909	0.7710351089588378	0.8813559322033898	0.6607142857142857	0.77	10.546848058700562	14.0	0.7130434782608696	0.7166666666666667	0.7090909090909091	0.7126210653753027	0.7288135593220338	0.6964285714285714	0.7126958891664774	11.563024282455444	14.0	0.6956521739130435	0.6818181818181818	0.7142857142857143	0.6938559322033898	0.7627118644067796	0.625	0.6933333333333332	16.433227062225342
139	14.0	0.7391304347826086	0.82	0.676923076923077	0.7457395009129641	0.6612903225806451	0.8301886792452831	0.738952784503632	1.3301243782043457	14.0	0.782608695652174	0.8245614035087719	0.7413793103448276	0.7846926354230067	0.7580645161290323	0.8113207547169812	0.7823453705806647	6.891716718673706	14.0	0.8	0.782608695652174	0.8260869565217391	0.7939744370054778	0.8709677419354839	0.7169811320754716	0.7960521242963992	10.72315526008606	14.0	0.6869565217391305	0.696969696969697	0.673469387755102	0.6822884966524649	0.7419354838709677	0.6226415094339622	0.6829044117647058	11.692812442779541	14.0	0.7043478260869566	0.7592592592592593	0.6557377049180327	0.7080036518563604	0.6612903225806451	0.7547169811320755	0.7043254688445251	17.930188417434692
140	15.0	0.7327586206896551	0.7017543859649122	0.7627118644067796	0.733273596176822	0.7407407407407407	0.7258064516129032	0.7322611868066413	1.6644175052642822	15.0	0.8017241379310345	0.7627118644067796	0.8421052631578947	0.803763440860215	0.8333333333333334	0.7741935483870968	0.8015914330333903	7.388887643814087	15.0	0.7586206896551724	0.6805555555555556	0.8863636363636364	0.7682198327359617	0.9074074074074074	0.6290322580645161	0.7568134171907757	10.520021915435791	15.0	0.7672413793103449	0.7454545454545455	0.7868852459016393	0.766726403823178	0.7592592592592593	0.7741935483870968	0.7663906914298502	12.457646131515503	15.0	0.7672413793103449	0.7454545454545455	0.7868852459016393	0.766726403823178	0.7592592592592593	0.7741935483870968	0.7663906914298502	16.500575065612793
141	15.0	0.7652173913043478	0.7272727272727273	0.8	0.7655677655677655	0.7692307692307693	0.7619047619047619	0.7640756781399589	1.7067756652832031	15.0	0.7652173913043478	0.6923076923076923	0.86	0.773962148962149	0.8653846153846154	0.6825396825396826	0.7651463580667119	6.996405124664307	15.0	0.7391304347826086	0.6571428571428571	0.8666666666666667	0.7518315018315018	0.8846153846153846	0.6190476190476191	0.73816029143898	10.494038343429565	15.0	0.7565217391304347	0.7142857142857143	0.7966101694915254	0.7576312576312576	0.7692307692307693	0.746031746031746	0.7556162720097146	12.336427450180054	15.0	0.7391304347826086	0.6833333333333333	0.8	0.7434371184371185	0.7884615384615384	0.6984126984126984	0.7389527845036319	15.140571594238281
142	15.0	0.8173913043478261	0.78	0.8461538461538461	0.814625850340136	0.7959183673469388	0.8333333333333334	0.8137867221836688	1.5977404117584229	15.0	0.808695652173913	0.7454545454545455	0.8666666666666667	0.8123067408781695	0.8367346938775511	0.7878787878787878	0.806929181929182	7.012887477874756	15.0	0.808695652173913	0.7076923076923077	0.94	0.8254483611626469	0.9387755102040817	0.7121212121212122	0.8086811857229281	11.34185266494751	15.0	0.7739130434782608	0.7674418604651163	0.7777777777777778	0.7609771181199753	0.673469387755102	0.8484848484848485	0.7644927536231882	12.947575092315674	15.0	0.7565217391304347	0.6842105263157895	0.8275862068965517	0.761595547309833	0.7959183673469388	0.7272727272727273	0.7550213024954351	17.10806155204773
143	15.0	0.7739130434782608	0.8181818181818182	0.7333333333333333	0.7762598664238008	0.7377049180327869	0.8148148148148148	0.7738959467634603	1.4834089279174805	15.0	0.7304347826086957	0.75	0.7090909090909091	0.7299635701275046	0.7377049180327869	0.7222222222222222	0.7296989915838956	6.875890493392944	15.0	0.7565217391304347	0.7619047619047619	0.75	0.7545537340619308	0.7868852459016393	0.7222222222222222	0.7550213024954351	9.739814758300781	15.0	0.7217391304347827	0.7636363636363637	0.6833333333333333	0.7238919247115969	0.6885245901639344	0.7592592592592593	0.7217180883242589	12.113179922103882	15.0	0.7565217391304347	0.7704918032786885	0.7407407407407407	0.7556162720097146	0.7704918032786885	0.7407407407407407	0.7556162720097146	17.639119148254395
144	15.0	0.8	0.8181818181818182	0.7833333333333333	0.8002117362371446	0.7758620689655172	0.8245614035087719	0.7999394902049769	1.5507535934448242	15.0	0.7304347826086957	0.7872340425531915	0.6911764705882353	0.7312462189957654	0.6379310344827587	0.8245614035087719	0.7283809523809524	6.61157488822937	15.0	0.6782608695652174	0.6909090909090909	0.6666666666666666	0.6784633998790078	0.6551724137931034	0.7017543859649122	0.6781635277210498	10.367036581039429	15.0	0.7391304347826086	0.7692307692307693	0.7142857142857143	0.7395644283121597	0.6896551724137931	0.7894736842105263	0.7386363636363638	11.931984186172485	15.0	0.7652173913043478	0.7818181818181819	0.75	0.765426497277677	0.7413793103448276	0.7894736842105263	0.7651463580667119	17.087281465530396
145	15.0	0.7652173913043478	0.8035714285714286	0.7288135593220338	0.7670006071645417	0.7377049180327869	0.7962962962962963	0.7651463580667122	1.504037857055664	15.0	0.782608695652174	0.78125	0.7843137254901961	0.7802064359441409	0.819672131147541	0.7407407407407407	0.7809523809523808	6.1583850383758545	15.0	0.7304347826086957	0.7205882352941176	0.7446808510638298	0.7257134183363692	0.8032786885245902	0.6481481481481481	0.7263796147056567	10.587639331817627	15.0	0.7652173913043478	0.8035714285714286	0.7288135593220338	0.7670006071645417	0.7377049180327869	0.7962962962962963	0.7651463580667122	11.387035369873047	15.0	0.7304347826086957	0.7419354838709677	0.7169811320754716	0.7289010321797207	0.7540983606557377	0.7037037037037037	0.7291239267532863	17.879090785980225
146	15.0	0.7739130434782608	0.7868852459016393	0.7592592592592593	0.7730722525804493	0.7868852459016393	0.7592592592592593	0.7730722525804492	1.878819227218628	15.0	0.808695652173913	0.8545454545454545	0.7666666666666667	0.8111718275652702	0.7704918032786885	0.8518518518518519	0.808681185722928	6.943315744400024	15.0	0.6434782608695652	0.6612903225806451	0.6226415094339622	0.6416211293260474	0.6721311475409836	0.6111111111111112	0.6417445482866043	10.150736331939697	15.0	0.7739130434782608	0.7868852459016393	0.7592592592592593	0.7730722525804493	0.7868852459016393	0.7592592592592593	0.7730722525804492	12.151939868927002	15.0	0.7652173913043478	0.7741935483870968	0.7547169811320755	0.76381299332119	0.7868852459016393	0.7407407407407407	0.764075678139959	18.95653200149536
147	15.0	0.7478260869565218	0.7222222222222222	0.7704918032786885	0.7469567863664028	0.7358490566037735	0.7580645161290323	0.7465998024466226	1.7068583965301514	15.0	0.6956521739130435	0.65	0.7454545454545455	0.6985696895922093	0.7358490566037735	0.6612903225806451	0.6955600937901824	6.4893341064453125	15.0	0.7304347826086957	0.6527777777777778	0.8604651162790697	0.7417833231892879	0.8867924528301887	0.5967741935483871	0.7283809523809524	10.261907577514648	15.0	0.6956521739130435	0.65	0.7454545454545455	0.6985696895922093	0.7358490566037735	0.6612903225806451	0.6955600937901824	12.360308170318604	15.0	0.7565217391304347	0.7272727272727273	0.7833333333333333	0.7563907486305539	0.7547169811320755	0.7580645161290323	0.7556162720097146	17.750450372695923
148	15.0	0.7130434782608696	0.7166666666666667	0.7090909090909091	0.7126210653753027	0.7288135593220338	0.6964285714285714	0.7126958891664774	1.490114688873291	15.0	0.7652173913043478	0.7857142857142857	0.7457627118644068	0.7657384987893463	0.7457627118644068	0.7857142857142857	0.7652173913043477	6.550509214401245	15.0	0.7739130434782608	0.726027397260274	0.8571428571428571	0.7705811138014529	0.8983050847457628	0.6428571428571429	0.7688620902906618	10.985151290893555	15.0	0.7130434782608696	0.7166666666666667	0.7090909090909091	0.7126210653753027	0.7288135593220338	0.6964285714285714	0.7126958891664774	11.441165924072266	15.0	0.7217391304347827	0.7142857142857143	0.7307692307692307	0.7206416464891041	0.7627118644067796	0.6785714285714286	0.7207043108682454	17.26290798187256
149	15.0	0.7304347826086957	0.803921568627451	0.671875	0.7363055386488131	0.6612903225806451	0.8113207547169812	0.7303532259284471	1.4751250743865967	15.0	0.7565217391304347	0.8035714285714286	0.711864406779661	0.7591296409007913	0.7258064516129032	0.7924528301886793	0.7563559322033899	6.755611181259155	15.0	0.808695652173913	0.803030303030303	0.8163265306122449	0.8047778454047474	0.8548387096774194	0.7547169811320755	0.8062193627450981	10.26976466178894	15.0	0.6869565217391305	0.7096774193548387	0.660377358490566	0.6850273889227023	0.7096774193548387	0.660377358490566	0.6850273889227024	11.636305809020996	15.0	0.7304347826086957	0.7540983606557377	0.7037037037037037	0.7294583079732198	0.7419354838709677	0.7169811320754716	0.7291239267532863	17.656646728515625
150	16.0	0.7327586206896551	0.6949152542372882	0.7719298245614035	0.734468339307049	0.7592592592592593	0.7096774193548387	0.7325797575667434	1.6638619899749756	16.0	0.7844827586206896	0.7543859649122807	0.8135593220338984	0.7852449223416965	0.7962962962962963	0.7741935483870968	0.7840816022634205	6.659595251083374	16.0	0.75	0.676056338028169	0.8666666666666667	0.7589605734767024	0.8888888888888888	0.6290322580645161	0.7484859813084113	10.585679531097412	16.0	0.7586206896551724	0.7321428571428571	0.7833333333333333	0.7586618876941458	0.7592592592592593	0.7580645161290323	0.7579731743666169	12.128837585449219	16.0	0.7758620689655172	0.75	0.8	0.7759856630824373	0.7777777777777778	0.7741935483870968	0.7752608047690015	17.70285129547119
151	16.0	0.7913043478260869	0.7413793103448276	0.8421052631578947	0.7944139194139194	0.8269230769230769	0.7619047619047619	0.7909090909090909	1.6586322784423828	16.0	0.782608695652174	0.7288135593220338	0.8392857142857143	0.7864774114774115	0.8269230769230769	0.746031746031746	0.7823453705806647	6.940835475921631	16.0	0.7478260869565218	0.6666666666666666	0.8695652173913043	0.7597680097680097	0.8846153846153846	0.6349206349206349	0.7471377663204185	10.23633098602295	16.0	0.7913043478260869	0.7692307692307693	0.8095238095238095	0.7893772893772895	0.7692307692307693	0.8095238095238095	0.7893772893772895	12.218991994857788	16.0	0.7304347826086957	0.6666666666666666	0.8076923076923077	0.7371794871794872	0.8076923076923077	0.6666666666666666	0.7304347826086955	18.511438846588135
152	16.0	0.8347826086956521	0.8125	0.8507462686567164	0.8297773654916512	0.7959183673469388	0.8636363636363636	0.8306332842415316	1.5996513366699219	16.0	0.8	0.7321428571428571	0.864406779661017	0.8047309833024119	0.8367346938775511	0.7727272727272727	0.7984761904761905	6.546103000640869	16.0	0.7913043478260869	0.6865671641791045	0.9375	0.8102968460111317	0.9387755102040817	0.6818181818181818	0.7912885662431943	10.110562801361084	16.0	0.8260869565217391	0.8372093023255814	0.8194444444444444	0.8143166357452072	0.7346938775510204	0.8939393939393939	0.818840579710145	12.819871425628662	16.0	0.782608695652174	0.7307692307692307	0.8253968253968254	0.7816944959802102	0.7755102040816326	0.7878787878787878	0.7793383989561746	17.751856565475464
153	16.0	0.808695652173913	0.8979591836734694	0.7424242424242424	0.8143594414086217	0.7213114754098361	0.9074074074074074	0.8083333333333333	1.4679374694824219	16.0	0.8	0.8518518518518519	0.7540983606557377	0.8029751062537948	0.7540983606557377	0.8518518518518519	0.7999999999999999	6.610086917877197	16.0	0.7565217391304347	0.7619047619047619	0.75	0.7545537340619308	0.7868852459016393	0.7222222222222222	0.7550213024954351	8.843323469161987	16.0	0.7217391304347827	0.7377049180327869	0.7037037037037037	0.7207043108682454	0.7377049180327869	0.7037037037037037	0.7207043108682454	11.828669786453247	16.0	0.7652173913043478	0.8148148148148148	0.7213114754098361	0.7680631451123254	0.7213114754098361	0.8148148148148148	0.7652173913043478	16.92648720741272
154	16.0	0.7913043478260869	0.8269230769230769	0.7619047619047619	0.7917422867513612	0.7413793103448276	0.8421052631578947	0.7909090909090909	1.6092772483825684	16.0	0.7739130434782608	0.8478260869565217	0.7246376811594203	0.7748033877797943	0.6724137931034483	0.8771929824561403	0.7718253968253967	6.696778297424316	16.0	0.6956521739130435	0.7017543859649122	0.6896551724137931	0.6957047791893527	0.6896551724137931	0.7017543859649122	0.6956521739130435	10.130648136138916	16.0	0.7565217391304347	0.7777777777777778	0.7377049180327869	0.7568058076225046	0.7241379310344828	0.7894736842105263	0.7563559322033899	11.537582635879517	16.0	0.7652173913043478	0.7719298245614035	0.7586206896551724	0.7652752571082879	0.7586206896551724	0.7719298245614035	0.7652173913043477	17.70210552215576
155	16.0	0.8	0.8064516129032258	0.7924528301886793	0.7987249544626593	0.819672131147541	0.7777777777777778	0.7990274295266317	1.546529769897461	16.0	0.808695652173913	0.819672131147541	0.7962962962962963	0.8079842137219186	0.819672131147541	0.7962962962962963	0.8079842137219186	6.570903539657593	16.0	0.7304347826086957	0.7142857142857143	0.7555555555555555	0.7246508803885854	0.819672131147541	0.6296296296296297	0.7251137327473205	10.765690803527832	16.0	0.7739130434782608	0.7868852459016393	0.7592592592592593	0.7730722525804493	0.7868852459016393	0.7592592592592593	0.7730722525804492	10.880852460861206	16.0	0.7565217391304347	0.7619047619047619	0.75	0.7545537340619308	0.7868852459016393	0.7222222222222222	0.7550213024954351	18.726688623428345
156	16.0	0.8	0.7794117647058824	0.8297872340425532	0.7955373406193078	0.8688524590163934	0.7222222222222222	0.7969913270396807	1.9350993633270264	16.0	0.7913043478260869	0.8490566037735849	0.7419354838709677	0.7947783849423193	0.7377049180327869	0.8518518518518519	0.7912885662431942	6.669823169708252	16.0	0.6782608695652174	0.6935483870967742	0.660377358490566	0.6765330904675166	0.7049180327868853	0.6481481481481481	0.6766962996732772	11.282661199569702	16.0	0.7478260869565218	0.7580645161290323	0.7358490566037735	0.7463570127504553	0.7704918032786885	0.7222222222222222	0.7465998024466226	12.301567792892456	16.0	0.7478260869565218	0.7580645161290323	0.7358490566037735	0.7463570127504553	0.7704918032786885	0.7222222222222222	0.7465998024466226	18.08981227874756
157	16.0	0.7652173913043478	0.75	0.7777777777777778	0.7630858186244673	0.7358490566037735	0.7903225806451613	0.7634285714285713	1.6847872734069824	16.0	0.7304347826086957	0.6896551724137931	0.7719298245614035	0.7321972002434571	0.7547169811320755	0.7096774193548387	0.7301082595200242	6.725424528121948	16.0	0.7478260869565218	0.6666666666666666	0.8837209302325582	0.7592818015824712	0.9056603773584906	0.6129032258064516	0.7459047619047618	10.609535932540894	16.0	0.7217391304347827	0.6909090909090909	0.75	0.7213937918441875	0.7169811320754716	0.7258064516129032	0.7207043108682454	13.023407459259033	16.0	0.7565217391304347	0.7192982456140351	0.7931034482758621	0.7577601947656726	0.7735849056603774	0.7419354838709677	0.7560606060606061	17.49751114845276
158	16.0	0.7217391304347827	0.7288135593220338	0.7142857142857143	0.7215496368038741	0.7288135593220338	0.7142857142857143	0.7215496368038741	1.5148100852966309	16.0	0.7130434782608696	0.7321428571428571	0.6949152542372882	0.7135290556900726	0.6949152542372882	0.7321428571428571	0.7130434782608696	6.101232290267944	16.0	0.7913043478260869	0.7397260273972602	0.8809523809523809	0.7879842615012107	0.9152542372881356	0.6607142857142857	0.7866419294990723	10.468864679336548	16.0	0.6869565217391305	0.6885245901639344	0.6851851851851852	0.6862893462469734	0.711864406779661	0.6607142857142857	0.6863636363636363	11.715872526168823	16.0	0.7391304347826086	0.7301587301587301	0.75	0.7380447941888619	0.7796610169491526	0.6964285714285714	0.73816029143898	17.342018842697144
159	16.0	0.7739130434782608	0.8214285714285714	0.7288135593220338	0.7766281192939745	0.7419354838709677	0.8113207547169812	0.7737590799031477	1.5580790042877197	16.0	0.7565217391304347	0.8148148148148148	0.7049180327868853	0.76049908703591	0.7096774193548387	0.8113207547169812	0.7565033272837265	5.664774179458618	16.0	0.8	0.782608695652174	0.8260869565217391	0.7939744370054778	0.8709677419354839	0.7169811320754716	0.7960521242963992	10.126750230789185	16.0	0.6956521739130435	0.7368421052631579	0.6551724137931034	0.6972002434570906	0.6774193548387096	0.7169811320754716	0.6952835188129305	11.349972248077393	16.0	0.7043478260869566	0.7333333333333333	0.6727272727272727	0.7038953134510042	0.7096774193548387	0.6981132075471698	0.7032483302975107	18.205060243606567
160	17.0	0.7586206896551724	0.7321428571428571	0.7833333333333333	0.7586618876941458	0.7592592592592593	0.7580645161290323	0.7579731743666169	1.6528873443603516	17.0	0.7931034482758621	0.7777777777777778	0.8064516129032258	0.7921146953405018	0.7777777777777778	0.8064516129032258	0.7921146953405018	6.632803201675415	17.0	0.7413793103448276	0.6764705882352942	0.8333333333333334	0.7485065710872163	0.8518518518518519	0.6451612903225806	0.7406855439642325	10.405974864959717	17.0	0.8620689655172413	0.8518518518518519	0.8709677419354839	0.8614097968936678	0.8518518518518519	0.8709677419354839	0.8614097968936678	12.848051071166992	17.0	0.7758620689655172	0.7413793103448276	0.8103448275862069	0.7771804062126643	0.7962962962962963	0.7580645161290323	0.7755952380952381	18.400248289108276
161	17.0	0.8	0.7636363636363637	0.8333333333333334	0.8006715506715507	0.8076923076923077	0.7936507936507936	0.7990274295266317	1.63150954246521	17.0	0.8260869565217391	0.7666666666666667	0.8909090909090909	0.8311965811965811	0.8846153846153846	0.7777777777777778	0.8259685230024214	6.416666030883789	17.0	0.7391304347826086	0.6571428571428571	0.8666666666666667	0.7518315018315018	0.8846153846153846	0.6190476190476191	0.73816029143898	10.430994272232056	17.0	0.8	0.7843137254901961	0.8125	0.7973137973137974	0.7692307692307693	0.8253968253968254	0.7977983334607446	13.02424931526184	17.0	0.7739130434782608	0.703125	0.8627450980392157	0.7818986568986569	0.8653846153846154	0.6984126984126984	0.7738959467634603	17.891129732131958
162	17.0	0.7739130434782608	0.7254901960784313	0.8125	0.7714904143475572	0.7551020408163265	0.7878787878787878	0.77	1.6258654594421387	17.0	0.8	0.7407407407407407	0.8524590163934426	0.8021026592455164	0.8163265306122449	0.7878787878787878	0.7977983334607447	6.713543891906738	17.0	0.8	0.696969696969697	0.9387755102040817	0.8178726035868893	0.9387755102040817	0.696969696969697	0.8000000000000002	10.929155111312866	17.0	0.7739130434782608	0.7674418604651163	0.7777777777777778	0.7609771181199753	0.673469387755102	0.8484848484848485	0.7644927536231882	13.74373984336853	17.0	0.7565217391304347	0.6909090909090909	0.8166666666666667	0.7589672232529375	0.7755102040816326	0.7424242424242424	0.7542735042735043	18.954038619995117
163	17.0	0.8260869565217391	0.8867924528301887	0.7741935483870968	0.8296903460837887	0.7704918032786885	0.8888888888888888	0.8260738052026618	1.506476640701294	17.0	0.7565217391304347	0.8	0.7166666666666667	0.7588038858530661	0.7213114754098361	0.7962962962962963	0.7565033272837265	6.6821441650390625	17.0	0.7478260869565218	0.75	0.7450980392156863	0.7452944748026715	0.7868852459016393	0.7037037037037037	0.745904761904762	10.252273082733154	17.0	0.7391304347826086	0.7924528301886793	0.6935483870967742	0.7424104432301153	0.6885245901639344	0.7962962962962963	0.7391107078039927	12.313624858856201	17.0	0.782608695652174	0.8103448275862069	0.7543859649122807	0.7833940497874924	0.7704918032786885	0.7962962962962963	0.7823453705806647	16.893040418624878
164	17.0	0.7478260869565218	0.7843137254901961	0.71875	0.7483363581367211	0.6896551724137931	0.8070175438596491	0.7471377663204186	1.5667939186096191	17.0	0.782608695652174	0.8	0.7666666666666667	0.7828191167574108	0.7586206896551724	0.8070175438596491	0.7825429241358445	6.423041105270386	17.0	0.7130434782608696	0.711864406779661	0.7142857142857143	0.7129461584996974	0.7241379310344828	0.7017543859649122	0.7129566598593147	10.247072219848633	17.0	0.7739130434782608	0.8076923076923077	0.746031746031746	0.7743496672716274	0.7241379310344828	0.8245614035087719	0.7734848484848484	11.691802501678467	17.0	0.7478260869565218	0.7735849056603774	0.7258064516129032	0.7481851179673321	0.7068965517241379	0.7894736842105263	0.747520629873571	17.276322841644287
165	17.0	0.7913043478260869	0.8032786885245902	0.7777777777777778	0.790528233151184	0.8032786885245902	0.7777777777777778	0.790528233151184	1.552405595779419	17.0	0.8	0.796875	0.803921568627451	0.7976624165148756	0.8360655737704918	0.7592592592592593	0.7984761904761905	6.519169092178345	17.0	0.7739130434782608	0.7611940298507462	0.7916666666666666	0.7698846387370978	0.8360655737704918	0.7037037037037037	0.7709865196078431	10.03021240234375	17.0	0.8	0.8392857142857143	0.7627118644067796	0.8019125683060109	0.7704918032786885	0.8333333333333334	0.799939490204977	11.8094642162323	17.0	0.8	0.8275862068965517	0.7719298245614035	0.8008500303582271	0.7868852459016393	0.8148148148148148	0.7997577409342116	18.88414430618286
166	17.0	0.7652173913043478	0.765625	0.7647058823529411	0.7627504553734061	0.8032786885245902	0.7222222222222222	0.7634285714285713	1.9120087623596191	17.0	0.8	0.8518518518518519	0.7540983606557377	0.8029751062537948	0.7540983606557377	0.8518518518518519	0.7999999999999999	6.681463956832886	17.0	0.6869565217391305	0.6984126984126984	0.6730769230769231	0.6847298117789922	0.7213114754098361	0.6481481481481481	0.6850273889227024	10.231298446655273	17.0	0.7565217391304347	0.7619047619047619	0.75	0.7545537340619308	0.7868852459016393	0.7222222222222222	0.7550213024954351	12.393752813339233	17.0	0.782608695652174	0.7903225806451613	0.7735849056603774	0.7812689738919247	0.8032786885245902	0.7592592592592593	0.7815515538332953	18.164700031280518
167	17.0	0.7565217391304347	0.7272727272727273	0.7833333333333333	0.7563907486305539	0.7547169811320755	0.7580645161290323	0.7556162720097146	1.6831696033477783	17.0	0.7217391304347827	0.6779661016949152	0.7678571428571429	0.7241326841144249	0.7547169811320755	0.6935483870967742	0.7215496368038741	6.674379348754883	17.0	0.7565217391304347	0.676056338028169	0.8863636363636364	0.7673463177115034	0.9056603773584906	0.6290322580645161	0.7550213024954351	10.977046966552734	17.0	0.6782608695652174	0.6333333333333333	0.7272727272727273	0.6810712111990261	0.7169811320754716	0.6451612903225806	0.6781635277210498	12.346662998199463	17.0	0.7217391304347827	0.6842105263157895	0.7586206896551724	0.7227632379793061	0.7358490566037735	0.7096774193548387	0.7212121212121212	19.0625102519989
168	17.0	0.7217391304347827	0.7288135593220338	0.7142857142857143	0.7215496368038741	0.7288135593220338	0.7142857142857143	0.7215496368038741	1.5349364280700684	17.0	0.7739130434782608	0.7894736842105263	0.7586206896551724	0.7742130750605327	0.7627118644067796	0.7857142857142857	0.7738959467634603	6.557528734207153	17.0	0.808695652173913	0.7605633802816901	0.8863636363636364	0.8058414043583535	0.9152542372881356	0.6964285714285714	0.8053846153846154	10.13607144355774	17.0	0.7217391304347827	0.7288135593220338	0.7142857142857143	0.7215496368038741	0.7288135593220338	0.7142857142857143	0.7215496368038741	11.366084814071655	17.0	0.7478260869565218	0.7419354838709677	0.7547169811320755	0.7469733656174334	0.7796610169491526	0.7142857142857143	0.7471377663204186	17.69242787361145
169	17.0	0.808695652173913	0.8703703703703703	0.7540983606557377	0.8129945222154595	0.7580645161290323	0.8679245283018868	0.8086811857229279	1.5761432647705078	17.0	0.7565217391304347	0.8148148148148148	0.7049180327868853	0.76049908703591	0.7096774193548387	0.8113207547169812	0.7565033272837265	6.625663757324219	17.0	0.8173913043478261	0.7971014492753623	0.8478260869565217	0.811472915398661	0.8870967741935484	0.7358490566037735	0.8137867221836688	10.607719421386719	17.0	0.6608695652173913	0.6825396825396826	0.6346153846153846	0.6580949482653682	0.6935483870967742	0.6226415094339622	0.6582857142857143	12.24944257736206	17.0	0.7304347826086957	0.7627118644067796	0.6964285714285714	0.7308277541083383	0.7258064516129032	0.7358490566037735	0.7296989915838956	17.51029062271118
170	18.0	0.7844827586206896	0.7543859649122807	0.8135593220338984	0.7852449223416965	0.7962962962962963	0.7741935483870968	0.7840816022634205	1.6934659481048584	18.0	0.7672413793103449	0.7288135593220338	0.8070175438596491	0.769115890083632	0.7962962962962963	0.7419354838709677	0.7670855953000669	6.716285943984985	18.0	0.7413793103448276	0.6764705882352942	0.8333333333333334	0.7485065710872163	0.8518518518518519	0.6451612903225806	0.7406855439642325	11.076229572296143	18.0	0.7844827586206896	0.7735849056603774	0.7936507936507936	0.7828554360812425	0.7592592592592593	0.8064516129032258	0.7831775700934579	13.02763319015503	18.0	0.7672413793103449	0.7368421052631579	0.7966101694915254	0.7679211469534051	0.7777777777777778	0.7580645161290323	0.766808130444494	19.42674994468689
171	18.0	0.8173913043478261	0.803921568627451	0.828125	0.8148656898656899	0.7884615384615384	0.8412698412698413	0.8153810870728537	1.696413516998291	18.0	0.8	0.7457627118644068	0.8571428571428571	0.8040293040293041	0.8461538461538461	0.7619047619047619	0.7997577409342116	6.68144679069519	18.0	0.7739130434782608	0.696969696969697	0.8775510204081632	0.7835775335775336	0.8846153846153846	0.6825396825396826	0.7737590799031477	10.67599630355835	18.0	0.7913043478260869	0.7692307692307693	0.8095238095238095	0.7893772893772895	0.7692307692307693	0.8095238095238095	0.7893772893772895	12.119518280029297	18.0	0.7652173913043478	0.7049180327868853	0.8333333333333334	0.7706043956043955	0.8269230769230769	0.7142857142857143	0.7651463580667119	18.972200632095337
172	18.0	0.7652173913043478	0.7115384615384616	0.8095238095238095	0.7639146567717996	0.7551020408163265	0.7727272727272727	0.7616854708726687	1.6560940742492676	18.0	0.7913043478260869	0.7192982456140351	0.8620689655172413	0.7971552257266543	0.8367346938775511	0.7575757575757576	0.7900182592818015	6.163070201873779	18.0	0.8	0.703125	0.9215686274509803	0.8152442795299939	0.9183673469387755	0.7121212121212122	0.799939490204977	10.93315315246582	18.0	0.8173913043478261	0.8043478260869565	0.8260869565217391	0.809369202226345	0.7551020408163265	0.8636363636363636	0.8116959064327485	12.879480838775635	18.0	0.8	0.76	0.8307692307692308	0.7968460111317255	0.7755102040816326	0.8181818181818182	0.7960521242963992	21.50149416923523
173	18.0	0.808695652173913	0.8823529411764706	0.75	0.8132969034608379	0.7377049180327869	0.8888888888888888	0.8085653753026634	1.5197904109954834	18.0	0.782608695652174	0.8333333333333334	0.7377049180327869	0.7855191256830601	0.7377049180327869	0.8333333333333334	0.782608695652174	5.684184789657593	18.0	0.7478260869565218	0.7424242424242424	0.7551020408163265	0.7442319368548878	0.8032786885245902	0.6851851851851852	0.7450500726244171	9.81921124458313	18.0	0.6956521739130435	0.75	0.6507936507936508	0.6993017607771707	0.639344262295082	0.7592592592592593	0.6955600937901822	12.090272426605225	18.0	0.7478260869565218	0.7758620689655172	0.7192982456140351	0.7484820886460231	0.7377049180327869	0.7592592592592593	0.747520629873571	18.482889413833618
174	18.0	0.782608695652174	0.8113207547169812	0.7580645161290323	0.7829703569267998	0.7413793103448276	0.8245614035087719	0.7823453705806647	1.5601427555084229	18.0	0.7652173913043478	0.8297872340425532	0.7205882352941176	0.766031457955233	0.6724137931034483	0.8596491228070176	0.7634285714285713	5.8072075843811035	18.0	0.7130434782608696	0.711864406779661	0.7142857142857143	0.7129461584996974	0.7241379310344828	0.7017543859649122	0.7129566598593147	10.319958925247192	18.0	0.7565217391304347	0.7777777777777778	0.7377049180327869	0.7568058076225046	0.7241379310344828	0.7894736842105263	0.7563559322033899	11.878692865371704	18.0	0.782608695652174	0.8	0.7666666666666667	0.7828191167574108	0.7586206896551724	0.8070175438596491	0.7825429241358445	18.682379722595215
175	18.0	0.8173913043478261	0.8125	0.8235294117647058	0.8151183970856102	0.8524590163934426	0.7777777777777778	0.8159999999999998	1.503112554550171	18.0	0.7565217391304347	0.7619047619047619	0.75	0.7545537340619308	0.7868852459016393	0.7222222222222222	0.7550213024954351	5.847366809844971	18.0	0.7391304347826086	0.7246376811594203	0.7608695652173914	0.7339101396478446	0.819672131147541	0.6481481481481481	0.7346153846153847	10.327725887298584	18.0	0.8173913043478261	0.8703703703703703	0.7704918032786885	0.8204310868245295	0.7704918032786885	0.8703703703703703	0.817391304347826	12.34310245513916	18.0	0.7478260869565218	0.7857142857142857	0.711864406779661	0.7495446265938069	0.7213114754098361	0.7777777777777778	0.7477497919975796	20.23345160484314
176	18.0	0.7652173913043478	0.7833333333333333	0.7454545454545455	0.7648755312689739	0.7704918032786885	0.7592592592592593	0.7645765410569414	1.8815677165985107	18.0	0.7913043478260869	0.8363636363636363	0.75	0.7937158469945356	0.7540983606557377	0.8333333333333334	0.7912885662431941	6.858417510986328	18.0	0.6782608695652174	0.6764705882352942	0.6808510638297872	0.6733454766241651	0.7540983606557377	0.5925925925925926	0.6734208304551385	9.133615732192993	18.0	0.782608695652174	0.8	0.7636363636363637	0.7823315118397085	0.7868852459016393	0.7777777777777778	0.7820153157934643	12.387427806854248	18.0	0.782608695652174	0.7727272727272727	0.7959183673469388	0.779143897996357	0.8360655737704918	0.7222222222222222	0.7802155798486354	18.640932321548462
177	18.0	0.7652173913043478	0.7321428571428571	0.7966101694915254	0.7658247108947048	0.7735849056603774	0.7580645161290323	0.7645765410569414	1.7022151947021484	18.0	0.6782608695652174	0.6333333333333333	0.7272727272727273	0.6810712111990261	0.7169811320754716	0.6451612903225806	0.6781635277210498	6.775018215179443	18.0	0.7478260869565218	0.6666666666666666	0.8837209302325582	0.7592818015824712	0.9056603773584906	0.6129032258064516	0.7459047619047618	9.449530839920044	18.0	0.7130434782608696	0.6724137931034483	0.7543859649122807	0.7146987218502738	0.7358490566037735	0.6935483870967742	0.7126958891664774	12.690577983856201	18.0	0.7478260869565218	0.7222222222222222	0.7704918032786885	0.7469567863664028	0.7358490566037735	0.7580645161290323	0.7465998024466226	19.25772261619568
178	18.0	0.7565217391304347	0.7924528301886793	0.7258064516129032	0.7577179176755449	0.711864406779661	0.8035714285714286	0.7563559322033899	1.5848209857940674	18.0	0.7130434782608696	0.7407407407407407	0.6885245901639344	0.7139830508474576	0.6779661016949152	0.75	0.7129566598593147	6.878089189529419	18.0	0.7913043478260869	0.7397260273972602	0.8809523809523809	0.7879842615012107	0.9152542372881356	0.6607142857142857	0.7866419294990723	9.478842973709106	18.0	0.6956521739130435	0.7	0.6909090909090909	0.6952179176755449	0.711864406779661	0.6785714285714286	0.6952835188129305	11.747775554656982	18.0	0.7478260869565218	0.7419354838709677	0.7547169811320755	0.7469733656174334	0.7796610169491526	0.7142857142857143	0.7471377663204186	19.265857696533203
179	18.0	0.7391304347826086	0.82	0.676923076923077	0.7457395009129641	0.6612903225806451	0.8301886792452831	0.738952784503632	1.5951263904571533	18.0	0.7739130434782608	0.8333333333333334	0.7213114754098361	0.7779975654290932	0.7258064516129032	0.8301886792452831	0.7738959467634603	6.226702690124512	18.0	0.8	0.7910447761194029	0.8125	0.7953438831405965	0.8548387096774194	0.7358490566037735	0.7969913270396807	9.847323417663574	18.0	0.6956521739130435	0.7142857142857143	0.6730769230769231	0.6930919050517346	0.7258064516129032	0.660377358490566	0.6933333333333334	11.517594814300537	18.0	0.7130434782608696	0.7457627118644068	0.6785714285714286	0.7133292757151553	0.7096774193548387	0.7169811320754716	0.7122602168473728	18.648958444595337
180	19.0	0.7327586206896551	0.7169811320754716	0.746031746031746	0.730884109916368	0.7037037037037037	0.7580645161290323	0.7311401869158879	1.7267265319824219	19.0	0.8017241379310345	0.7818181818181819	0.819672131147541	0.801373954599761	0.7962962962962963	0.8064516129032258	0.8009994778846872	6.805937051773071	19.0	0.7068965517241379	0.6351351351351351	0.8333333333333334	0.7174432497013142	0.8703703703703703	0.5645161290322581	0.7037259615384616	10.80865740776062	19.0	0.7758620689655172	0.78	0.7727272727272727	0.7724014336917563	0.7222222222222222	0.8225806451612904	0.7734375	12.85905408859253	19.0	0.7327586206896551	0.7017543859649122	0.7627118644067796	0.733273596176822	0.7407407407407407	0.7258064516129032	0.7322611868066413	18.615885496139526
181	19.0	0.7652173913043478	0.7192982456140351	0.8103448275862069	0.7672466422466422	0.7884615384615384	0.746031746031746	0.7645765410569414	1.708169937133789	19.0	0.8260869565217391	0.7666666666666667	0.8909090909090909	0.8311965811965811	0.8846153846153846	0.7777777777777778	0.8259685230024214	6.439305782318115	19.0	0.7478260869565218	0.6666666666666666	0.8695652173913043	0.7597680097680097	0.8846153846153846	0.6349206349206349	0.7471377663204185	9.528636932373047	19.0	0.7913043478260869	0.7692307692307693	0.8095238095238095	0.7893772893772895	0.7692307692307693	0.8095238095238095	0.7893772893772895	11.798729181289673	19.0	0.7130434782608696	0.6557377049180327	0.7777777777777778	0.717948717948718	0.7692307692307693	0.6666666666666666	0.7129566598593147	18.85482406616211
182	19.0	0.7652173913043478	0.7037037037037037	0.819672131147541	0.7665429808286951	0.7755102040816326	0.7575757575757576	0.7626328262365263	1.643918752670288	19.0	0.7913043478260869	0.711864406779661	0.875	0.7997835497835497	0.8571428571428571	0.7424242424242424	0.7905282331511839	5.728148698806763	19.0	0.8173913043478261	0.71875	0.9411764705882353	0.8330241187384044	0.9387755102040817	0.7272727272727273	0.8173360562741093	10.458220481872559	19.0	0.8347826086956521	0.875	0.8133333333333334	0.8192640692640693	0.7142857142857143	0.9242424242424242	0.8258825404414694	13.191219568252563	19.0	0.7913043478260869	0.7358490566037735	0.8387096774193549	0.7918985776128633	0.7959183673469388	0.7878787878787878	0.7886029411764706	20.04393219947815
183	19.0	0.8	0.88	0.7384615384615385	0.8051001821493624	0.7213114754098361	0.8888888888888888	0.7997577409342116	1.509908676147461	19.0	0.7652173913043478	0.7931034482758621	0.7368421052631579	0.7659380692167577	0.7540983606557377	0.7777777777777778	0.7649330002271177	5.8947577476501465	19.0	0.7478260869565218	0.7580645161290323	0.7358490566037735	0.7463570127504553	0.7704918032786885	0.7222222222222222	0.7465998024466226	9.940295457839966	19.0	0.7478260869565218	0.8076923076923077	0.6984126984126984	0.7516697024893746	0.6885245901639344	0.8148148148148148	0.7477497919975795	11.92155933380127	19.0	0.782608695652174	0.8103448275862069	0.7543859649122807	0.7833940497874924	0.7704918032786885	0.7962962962962963	0.7823453705806647	18.443023204803467
184	19.0	0.7565217391304347	0.7884615384615384	0.7301587301587301	0.7569570477918934	0.7068965517241379	0.8070175438596491	0.7560606060606061	1.5865745544433594	19.0	0.7478260869565218	0.7843137254901961	0.71875	0.7483363581367211	0.6896551724137931	0.8070175438596491	0.7471377663204186	6.258305549621582	19.0	0.7130434782608696	0.7192982456140351	0.7068965517241379	0.7130973986690865	0.7068965517241379	0.7192982456140351	0.7130434782608696	10.559880256652832	19.0	0.7652173913043478	0.8297872340425532	0.7205882352941176	0.766031457955233	0.6724137931034483	0.8596491228070176	0.7634285714285713	11.62391972541809	19.0	0.8	0.7966101694915254	0.8035714285714286	0.7999092558983666	0.8103448275862069	0.7894736842105263	0.7999394902049768	22.04885172843933
185	19.0	0.8	0.8064516129032258	0.7924528301886793	0.7987249544626593	0.819672131147541	0.7777777777777778	0.7990274295266317	1.4973506927490234	19.0	0.7391304347826086	0.7246376811594203	0.7608695652173914	0.7339101396478446	0.819672131147541	0.6481481481481481	0.7346153846153847	6.218217134475708	19.0	0.7652173913043478	0.7428571428571429	0.8	0.7595628415300546	0.8524590163934426	0.6666666666666666	0.7605829285218597	9.229841470718384	19.0	0.782608695652174	0.8333333333333334	0.7377049180327869	0.7855191256830601	0.7377049180327869	0.8333333333333334	0.782608695652174	11.225899934768677	19.0	0.7304347826086957	0.7419354838709677	0.7169811320754716	0.7289010321797207	0.7540983606557377	0.7037037037037037	0.7291239267532863	17.967203617095947
186	19.0	0.7913043478260869	0.8135593220338984	0.7678571428571429	0.7915907710989678	0.7868852459016393	0.7962962962962963	0.790909090909091	1.8828620910644531	19.0	0.782608695652174	0.8214285714285714	0.7457627118644068	0.7844565877352763	0.7540983606557377	0.8148148148148148	0.7825429241358446	6.741672039031982	19.0	0.7130434782608696	0.7121212121212122	0.7142857142857143	0.7093199757134183	0.7704918032786885	0.6481481481481481	0.7098845654001987	9.686766386032104	19.0	0.7478260869565218	0.7580645161290323	0.7358490566037735	0.7463570127504553	0.7704918032786885	0.7222222222222222	0.7465998024466226	11.481032133102417	19.0	0.7739130434782608	0.7692307692307693	0.78	0.7709471766848817	0.819672131147541	0.7222222222222222	0.771825396825397	17.53655242919922
187	19.0	0.7565217391304347	0.7358490566037735	0.7741935483870968	0.7550213024954351	0.7358490566037735	0.7741935483870968	0.7550213024954351	1.6426265239715576	19.0	0.7043478260869566	0.6557377049180327	0.7592592592592593	0.7080036518563604	0.7547169811320755	0.6612903225806451	0.7043254688445251	6.804751873016357	19.0	0.7478260869565218	0.6714285714285714	0.8666666666666667	0.7579123554473524	0.8867924528301887	0.6290322580645161	0.7465998024466226	10.623676061630249	19.0	0.7217391304347827	0.6842105263157895	0.7586206896551724	0.7227632379793061	0.7358490566037735	0.7096774193548387	0.7212121212121212	12.030806541442871	19.0	0.7565217391304347	0.711864406779661	0.8035714285714286	0.7591296409007913	0.7924528301886793	0.7258064516129032	0.7563559322033899	18.29934287071228
188	19.0	0.7478260869565218	0.7678571428571429	0.7288135593220338	0.7483353510895884	0.7288135593220338	0.7678571428571429	0.7478260869565218	1.5132477283477783	19.0	0.7478260869565218	0.7586206896551724	0.7368421052631579	0.7478813559322034	0.7457627118644068	0.75	0.7477497919975795	6.8369433879852295	19.0	0.808695652173913	0.7681159420289855	0.8695652173913043	0.8062953995157385	0.8983050847457628	0.7142857142857143	0.806219362745098	10.7490873336792	19.0	0.7217391304347827	0.7368421052631579	0.7068965517241379	0.722003631961259	0.711864406779661	0.7321428571428571	0.7217180883242589	11.368316888809204	19.0	0.7478260869565218	0.7419354838709677	0.7547169811320755	0.7469733656174334	0.7796610169491526	0.7142857142857143	0.7471377663204186	18.585561990737915
189	19.0	0.7217391304347827	0.8	0.6615384615384615	0.7282410225197808	0.6451612903225806	0.8113207547169812	0.7215496368038741	1.529676914215088	19.0	0.7652173913043478	0.8181818181818182	0.7166666666666667	0.7685636031649422	0.7258064516129032	0.8113207547169812	0.765146358066712	6.5416717529296875	19.0	0.7913043478260869	0.7794117647058824	0.8085106382978723	0.7859099208764455	0.8548387096774194	0.7169811320754716	0.7876923076923077	10.578683376312256	19.0	0.6869565217391305	0.7096774193548387	0.660377358490566	0.6850273889227023	0.7096774193548387	0.660377358490566	0.6850273889227024	11.208834886550903	19.0	0.7217391304347827	0.75	0.6909090909090909	0.7213937918441875	0.7258064516129032	0.7169811320754716	0.7207043108682454	18.517240047454834
190	20.0	0.75	0.7049180327868853	0.8	0.7529868578255675	0.7962962962962963	0.7096774193548387	0.7499814195466369	1.659965991973877	20.0	0.7586206896551724	0.7096774193548387	0.8148148148148148	0.7622461170848267	0.8148148148148148	0.7096774193548387	0.7586206896551724	6.519218921661377	20.0	0.6896551724137931	0.625	0.7954545454545454	0.6989247311827957	0.8333333333333334	0.5645161290322581	0.6873315363881403	10.307120323181152	20.0	0.7931034482758621	0.8125	0.7794117647058824	0.7885304659498208	0.7222222222222222	0.8548387096774194	0.7900452488687782	13.373670101165771	20.0	0.8017241379310345	0.7924528301886793	0.8095238095238095	0.8001792114695341	0.7777777777777778	0.8225806451612904	0.8005233644859813	18.820676803588867
191	20.0	0.8	0.7636363636363637	0.8333333333333334	0.8006715506715507	0.8076923076923077	0.7936507936507936	0.7990274295266317	1.6131532192230225	20.0	0.7913043478260869	0.7258064516129032	0.8679245283018868	0.7977716727716728	0.8653846153846154	0.7301587301587301	0.7912885662431942	6.570261240005493	20.0	0.7391304347826086	0.6571428571428571	0.8666666666666667	0.7518315018315018	0.8846153846153846	0.6190476190476191	0.73816029143898	10.341045379638672	20.0	0.7652173913043478	0.7358490566037735	0.7903225806451613	0.7638888888888888	0.75	0.7777777777777778	0.7634285714285713	11.829468965530396	20.0	0.7652173913043478	0.7272727272727273	0.8	0.7655677655677655	0.7692307692307693	0.7619047619047619	0.7640756781399589	22.08002018928528
192	20.0	0.808695652173913	0.7755102040816326	0.8333333333333334	0.804421768707483	0.7755102040816326	0.8333333333333334	0.804421768707483	1.594820499420166	20.0	0.8173913043478261	0.7592592592592593	0.8688524590163934	0.819882498453927	0.8367346938775511	0.803030303030303	0.8153810870728537	6.105573654174805	20.0	0.7739130434782608	0.6716417910447762	0.9166666666666666	0.7925170068027211	0.9183673469387755	0.6666666666666666	0.7738959467634603	10.908584833145142	20.0	0.7478260869565218	0.7083333333333334	0.7761194029850746	0.7408781694495981	0.6938775510204082	0.7878787878787878	0.7414929075265484	12.751737594604492	20.0	0.7913043478260869	0.7551020408163265	0.8181818181818182	0.7866419294990723	0.7551020408163265	0.8181818181818182	0.7866419294990723	20.022374391555786
193	20.0	0.782608695652174	0.8333333333333334	0.7377049180327869	0.7855191256830601	0.7377049180327869	0.8333333333333334	0.782608695652174	1.5380864143371582	20.0	0.782608695652174	0.8214285714285714	0.7457627118644068	0.7844565877352763	0.7540983606557377	0.8148148148148148	0.7825429241358446	6.593703508377075	20.0	0.7478260869565218	0.75	0.7450980392156863	0.7452944748026715	0.7868852459016393	0.7037037037037037	0.745904761904762	10.115974426269531	20.0	0.7478260869565218	0.7962962962962963	0.7049180327868853	0.7506071645415908	0.7049180327868853	0.7962962962962963	0.7478260869565216	11.96636414527893	20.0	0.7739130434782608	0.8301886792452831	0.7258064516129032	0.7773224043715847	0.7213114754098361	0.8333333333333334	0.7738959467634603	18.333736896514893
194	20.0	0.808695652173913	0.8461538461538461	0.7777777777777778	0.809134906231095	0.7586206896551724	0.8596491228070176	0.8083333333333333	1.5531728267669678	20.0	0.7478260869565218	0.7843137254901961	0.71875	0.7483363581367211	0.6896551724137931	0.8070175438596491	0.7471377663204186	6.5602874755859375	20.0	0.7043478260869566	0.7142857142857143	0.6949152542372882	0.7044767090139141	0.6896551724137931	0.7192982456140351	0.7043254688445251	10.427591562271118	20.0	0.7652173913043478	0.8297872340425532	0.7205882352941176	0.766031457955233	0.6724137931034483	0.8596491228070176	0.7634285714285713	11.491714477539062	20.0	0.7391304347826086	0.75	0.7288135593220338	0.7392619479733817	0.7241379310344828	0.7543859649122807	0.7391107078039928	20.616814374923706
195	20.0	0.8	0.8064516129032258	0.7924528301886793	0.7987249544626593	0.819672131147541	0.7777777777777778	0.7990274295266317	1.49159836769104	20.0	0.8173913043478261	0.8225806451612904	0.8113207547169812	0.8161809350333941	0.8360655737704918	0.7962962962962963	0.8165033052199682	6.295840501785278	20.0	0.7478260869565218	0.7424242424242424	0.7551020408163265	0.7442319368548878	0.8032786885245902	0.6851851851851852	0.7450500726244171	10.395599365234375	20.0	0.782608695652174	0.8103448275862069	0.7543859649122807	0.7833940497874924	0.7704918032786885	0.7962962962962963	0.7823453705806647	11.070323944091797	20.0	0.7652173913043478	0.7741935483870968	0.7547169811320755	0.76381299332119	0.7868852459016393	0.7407407407407407	0.764075678139959	18.49796748161316
196	20.0	0.7391304347826086	0.7540983606557377	0.7222222222222222	0.73816029143898	0.7540983606557377	0.7222222222222222	0.73816029143898	1.8461530208587646	20.0	0.7913043478260869	0.8363636363636363	0.75	0.7937158469945356	0.7540983606557377	0.8333333333333334	0.7912885662431941	6.714978218078613	20.0	0.7043478260869566	0.7142857142857143	0.6923076923076923	0.7021857923497268	0.7377049180327869	0.6666666666666666	0.7025258673158856	9.542251825332642	20.0	0.7739130434782608	0.7868852459016393	0.7592592592592593	0.7730722525804493	0.7868852459016393	0.7592592592592593	0.7730722525804492	11.892173290252686	20.0	0.7565217391304347	0.7619047619047619	0.75	0.7545537340619308	0.7868852459016393	0.7222222222222222	0.7550213024954351	18.279916524887085
197	20.0	0.7478260869565218	0.7307692307692307	0.7619047619047619	0.7455873402312843	0.7169811320754716	0.7741935483870968	0.7459047619047618	1.7917091846466064	20.0	0.7478260869565218	0.7142857142857143	0.7796610169491526	0.7483262325015216	0.7547169811320755	0.7419354838709677	0.7471377663204186	6.440087795257568	20.0	0.7565217391304347	0.676056338028169	0.8863636363636364	0.7673463177115034	0.9056603773584906	0.6290322580645161	0.7550213024954351	9.463821172714233	20.0	0.7043478260869566	0.6610169491525424	0.75	0.7066342057212416	0.7358490566037735	0.6774193548387096	0.7041464891041163	11.68562388420105	20.0	0.7565217391304347	0.7450980392156863	0.765625	0.7536518563603165	0.7169811320754716	0.7903225806451613	0.7542735042735043	22.013580560684204
198	20.0	0.7478260869565218	0.7586206896551724	0.7368421052631579	0.7478813559322034	0.7457627118644068	0.75	0.7477497919975795	1.630239486694336	20.0	0.7652173913043478	0.7857142857142857	0.7457627118644068	0.7657384987893463	0.7457627118644068	0.7857142857142857	0.7652173913043477	6.590059757232666	20.0	0.808695652173913	0.7605633802816901	0.8863636363636364	0.8058414043583535	0.9152542372881356	0.6964285714285714	0.8053846153846154	11.541629076004028	20.0	0.6869565217391305	0.6949152542372882	0.6785714285714286	0.6867433414043584	0.6949152542372882	0.6785714285714286	0.6867433414043584	11.734729051589966	20.0	0.6956521739130435	0.6935483870967742	0.6981132075471698	0.6947639225181598	0.7288135593220338	0.6607142857142857	0.69482144211085	17.616346836090088
199	20.0	0.7739130434782608	0.8461538461538461	0.7142857142857143	0.7793670115642118	0.7096774193548387	0.8490566037735849	0.7738959467634604	1.5960733890533447	20.0	0.7391304347826086	0.7857142857142857	0.6949152542372882	0.7416311625076081	0.7096774193548387	0.7735849056603774	0.7389527845036321	6.740155935287476	20.0	0.7913043478260869	0.7878787878787878	0.7959183673469388	0.7872793670115642	0.8387096774193549	0.7358490566037735	0.7886029411764706	10.341842412948608	20.0	0.6695652173913044	0.7	0.6363636363636364	0.6688983566646378	0.6774193548387096	0.660377358490566	0.6683363691560412	10.564249038696289	20.0	0.7043478260869566	0.7413793103448276	0.6666666666666666	0.705264759586123	0.6935483870967742	0.7169811320754716	0.7037878787878789	19.35433030128479
200	21.0	0.7672413793103449	0.7288135593220338	0.8070175438596491	0.769115890083632	0.7962962962962963	0.7419354838709677	0.7670855953000669	1.6877787113189697	21.0	0.8189655172413793	0.7894736842105263	0.847457627118644	0.8198924731182795	0.8333333333333334	0.8064516129032258	0.8186285459012732	6.717663288116455	21.0	0.7413793103448276	0.6818181818181818	0.82	0.7473118279569892	0.8333333333333334	0.6612903225806451	0.7410714285714286	10.446265459060669	21.0	0.7844827586206896	0.7543859649122807	0.8135593220338984	0.7852449223416965	0.7962962962962963	0.7741935483870968	0.7840816022634205	12.77890682220459	21.0	0.8189655172413793	0.7796610169491526	0.8596491228070176	0.8210872162485066	0.8518518518518519	0.7903225806451613	0.8188443519000521	20.64367437362671
201	21.0	0.7652173913043478	0.7358490566037735	0.7903225806451613	0.7638888888888888	0.75	0.7777777777777778	0.7634285714285713	1.6606032848358154	21.0	0.782608695652174	0.7213114754098361	0.8518518518518519	0.7881562881562881	0.8461538461538461	0.7301587301587301	0.7825429241358445	6.879009485244751	21.0	0.7304347826086957	0.647887323943662	0.8636363636363636	0.7438949938949939	0.8846153846153846	0.6031746031746031	0.7291239267532862	11.108352899551392	21.0	0.7478260869565218	0.6949152542372882	0.8035714285714286	0.7513736263736264	0.7884615384615384	0.7142857142857143	0.747520629873571	11.726485013961792	21.0	0.7478260869565218	0.6949152542372882	0.8035714285714286	0.7513736263736264	0.7884615384615384	0.7142857142857143	0.747520629873571	18.987460136413574
202	21.0	0.808695652173913	0.7872340425531915	0.8235294117647058	0.8017934446505874	0.7551020408163265	0.8484848484848485	0.8033271144278606	1.6320667266845703	21.0	0.7913043478260869	0.7192982456140351	0.8620689655172413	0.7971552257266543	0.8367346938775511	0.7575757575757576	0.7900182592818015	7.1894872188568115	21.0	0.808695652173913	0.7076923076923077	0.94	0.8254483611626469	0.9387755102040817	0.7121212121212122	0.8086811857229281	10.833807945251465	21.0	0.7913043478260869	0.7777777777777778	0.8	0.7813852813852814	0.7142857142857143	0.8484848484848485	0.7841051314142679	12.365300416946411	21.0	0.782608695652174	0.74	0.8153846153846154	0.7790661719233147	0.7551020408163265	0.803030303030303	0.7783175264091294	20.55083417892456
203	21.0	0.7478260869565218	0.7962962962962963	0.7049180327868853	0.7506071645415908	0.7049180327868853	0.7962962962962963	0.7478260869565216	1.5469393730163574	21.0	0.782608695652174	0.8333333333333334	0.7377049180327869	0.7855191256830601	0.7377049180327869	0.8333333333333334	0.782608695652174	6.660037279129028	21.0	0.7478260869565218	0.75	0.7450980392156863	0.7452944748026715	0.7868852459016393	0.7037037037037037	0.745904761904762	10.54062271118164	21.0	0.7304347826086957	0.7586206896551724	0.7017543859649122	0.7310261080752884	0.7213114754098361	0.7407407407407407	0.7301082595200241	12.252652883529663	21.0	0.7043478260869566	0.7547169811320755	0.6612903225806451	0.7074984820886461	0.6557377049180327	0.7592592592592593	0.7043254688445251	19.909257173538208
204	21.0	0.782608695652174	0.8113207547169812	0.7580645161290323	0.7829703569267998	0.7413793103448276	0.8245614035087719	0.7823453705806647	1.6558842658996582	21.0	0.7913043478260869	0.84	0.7538461538461538	0.7918935269207501	0.7241379310344828	0.8596491228070176	0.7905282331511839	6.69350004196167	21.0	0.7130434782608696	0.711864406779661	0.7142857142857143	0.7129461584996974	0.7241379310344828	0.7017543859649122	0.7129566598593147	9.900973796844482	21.0	0.7304347826086957	0.7454545454545455	0.7166666666666667	0.7306412583182094	0.7068965517241379	0.7543859649122807	0.7303532259284471	11.662418127059937	21.0	0.7739130434782608	0.8076923076923077	0.746031746031746	0.7743496672716274	0.7241379310344828	0.8245614035087719	0.7734848484848484	19.022641897201538
[truncated: 85 more rows]

## Sheet: PosFIdf
Column1	PosfIdf(1,1)_deep	PosfIdf(1,1)_prec	PosfIdf(1,1)_prec_fake	PosfIdf(1,1)_prec_real	PosfIdf(1,1)_rec	PosfIdf(1,1)_rec_fake	PosfIdf(1,1)_rec_real	PosfIdf(1,1)_f1-sc	PosfIdf(1,1)_time	PosfIdf(2,2)_deep	PosfIdf(2,2)_prec	PosfIdf(2,2)_prec_fake	PosfIdf(2,2)_prec_real	PosfIdf(2,2)_rec	PosfIdf(2,2)_rec_fake	PosfIdf(2,2)_rec_real	PosfIdf(2,2)_f1-sc	PosfIdf(2,2)_time	PosfIdf(3,3)_deep	PosfIdf(3,3)_prec	PosfIdf(3,3)_prec_fake	PosfIdf(3,3)_prec_real	PosfIdf(3,3)_rec	PosfIdf(3,3)_rec_fake	PosfIdf(3,3)_rec_real	PosfIdf(3,3)_f1-sc	PosfIdf(3,3)_time	PosfIdf(1,3)_deep	PosfIdf(1,3)_prec	PosfIdf(1,3)_prec_fake	PosfIdf(1,3)_prec_real	PosfIdf(1,3)_rec	PosfIdf(1,3)_rec_fake	PosfIdf(1,3)_rec_real	PosfIdf(1,3)_f1-sc	PosfIdf(1,3)_time	PosfIdf(1,4)_deep	PosfIdf(1,4)_prec	PosfIdf(1,4)_prec_fake	PosfIdf(1,4)_prec_real	PosfIdf(1,4)_rec	PosfIdf(1,4)_rec_fake	PosfIdf(1,4)_rec_real	PosfIdf(1,4)_f1-sc	PosfIdf(1,4)_time
[truncated: 290 more rows]

[truncated: 2 more sheets: PosF, merge]
